# Supplementary material for: Stereoselective construction of a 5-aza-spiro[2,4]heptane motif via catalytic asymmetric 1,3-dipolar cycloaddition of azomethine ylides and ethyl cyclopropylidene acetate
Source: Royal Society of Chemistry journal article supplement (doi:10.1039/c0cc04329j), 2011-01-01
Supplement: c0cc04329j.pdf [file c0cc04329j.pdf]

**Stereoselective Construction of 5-*aza*-Spiro[2,4]heptane Motif via  
Catalytic Asymmetric 1,3-Dipolar Cycloaddition of Azomethine  
Ylides and Ethyl Cyclopropylidene Acetate**

Tang-Lin Liu, Zhao-Lin He, Hai-Yan Tao, Yue-Peng Cai, and Chun-Jiang Wang\*

*E-mail:* [cjwang@whu.edu.cn](mailto:cjwang@whu.edu.cn)

Table of Contents

|       |                                                                                                                                                                                                                     |       |
|-------|---------------------------------------------------------------------------------------------------------------------------------------------------------------------------------------------------------------------|-------|
| I.    | General Remarks                                                                                                                                                                                                     | 2     |
| II.   | General Procedure for racemic 1,3-Dipolar Cycloaddition of Imino Esters with Ethyl Cyclopropylidene Acetate Catalyzed by Cu(CH <sub>3</sub> CN) <sub>4</sub> BF <sub>4</sub> /( $\pm$ )-TF-BiphamPhos Complex       | 2     |
| III.  | General Procedure for Asymmetric 1,3-Dipolar Cycloaddition of Imino Ester with Ethyl cyclopropylidene acetate Catalyzed by Cu(CHC <sub>3</sub> CN) <sub>4</sub> BF <sub>4</sub> /( <i>S</i> )-TF-BiphamPhos Complex | 3-12  |
| IV.   | X-Ray Crystal Structures of <i>endo</i> -Adducts ( <i>4R,6S,7R</i> )- <b>3aa</b> (absolute configuration)                                                                                                           | 13    |
| V.    | Proposed Transition States of the <i>endo</i> -Selectivity for Asymmetric 1,3-Dipolar Cycloaddition of Imino Esters with 2-Cyclopropylidene Acetate                                                                 | 13-14 |
| VI.   | References                                                                                                                                                                                                          | 15    |
| VII.  | <sup>1</sup> H NMR and <sup>13</sup> C NMR spectra                                                                                                                                                                  | 16-51 |
| VIII. | HPLC Chromatograms                                                                                                                                                                                                  | 52-87 |

## General Remarks.

<sup>1</sup>H NMR spectra were recorded on a VARIAN Mercury 300 MHz spectrometer in chloroform-d<sub>3</sub>. Chemical shifts are reported in ppm with the internal TMS signal at 0.0 ppm as a standard. The data are reported as (s = single, d = double, t = triple, q = quarte, m = multiple or unresolved, brs = broad single, coupling constant(s) in Hz, integration). <sup>13</sup>C NMR spectra were recorded on a VARIAN Mercury 75 MHz spectrometer in CDCl<sub>3</sub>. Chemical shifts are reported in ppm with the internal chloroform signal at 77.0 ppm as a standard. Commercially obtained reagents were used without further purification. All reactions were monitored by TLC with silica gel-coated plates. Diastereomeric ratios were determined from crude <sup>1</sup>H NMR or HPLC analysis. Enantiomeric ratios were determined by HPLC, using a chiralcel AD-H column, a chiralpak AS-H column with hexane and *i*-PrOH as solvents. Ligands **L1** and **L2** were prepared according to the literature procedure reported by us.<sup>[1]</sup> Ethyl cyclopropylidene acetate and imino esters were prepared according to the literature procedure.<sup>[1,2]</sup> The racemic adducts were attained by using Cu(CH<sub>3</sub>CN)<sub>4</sub>BF<sub>4</sub>/(±)-TF-BiphamPhos as the catalyst. The absolute (4*R*,6*S*,7*R*)-**3aa** achieved by Cu(CH<sub>3</sub>CN)<sub>4</sub>BF<sub>4</sub>/(*S*)-TF-BiphamPhos was determined unequivocally according to the X-ray diffraction analysis, and those of other adducts were deduced on the basis of these results.

## General Procedure for racemic 1,3-Dipolar Cycloaddition of Azomethine Ylides with Ethyl Cyclopropylidene Acetate Catalyzed by Cu(CH<sub>3</sub>CN)<sub>4</sub>BF<sub>4</sub>/(±)-TF-BiphamPhos Complex

Under argon atmosphere, (±)-TF-BiphamPhos (4.6 mg, 0.0072 mmol) and Cu(CH<sub>3</sub>CN)<sub>4</sub>BF<sub>4</sub> (1.9 mg, 0.006 mmol) were dissolved in 2 mL DCM, and stirred at room temperature for about 1h. Then, imine substrate (0.4 mmol), Et<sub>3</sub>N (0.03 mmol) and Ethyl cyclopropylidene acetate (0.2 mmol) were added sequentially. Once starting material was consumed (monitored by TLC), the organic solvent was removed and the residue was purified by column chromatography to give the cycloaddition product (76-90% yield), which was used as the racemic sample for the chiral HPLC analysis.

## General Procedure for Asymmetric 1,3-Dipolar Cycloaddition of Azomethine Ylides with Ethyl cyclopropylidene acetate Catalyzed by $\text{Cu}(\text{CH}_3\text{CN})_4\text{BF}_4/(\text{S})\text{-TF-BiphamPhos}$ Complex

Under argon atmosphere (*S*)-TF-BiphamPhos **1a** (4.6 mg, 0.0072 mmol) and  $\text{Cu}(\text{CH}_3\text{CN})_4\text{BF}_4$  (1.9 mg, 0.006 mmol) were dissolved in 2 mL DCM, and stirred at room temperature for about 1h. After it was cooled to the indicated temperature, imine substrate (0.4 mmol),  $\text{Et}_3\text{N}$  (0.03 mmol) and Ethyl cyclopropylidene acetate (0.2 mmol) were added sequentially. Once starting material was consumed (monitored by TLC), the mixture was filtered through celite and the filtrate was concentrated to dryness. The product purified by column chromatography to give the corresponding cycloaddition product, which was then directly analyzed by chiral HPLC to determine the enantiomeric excess.

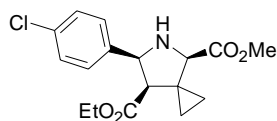

**(3aa)**

**(4*R*,6*S*,7*R*)-7-ethyl 4-methyl 6-(4-chlorophenyl)-5-azaspiro[2.4]heptane-4,7-dicarboxylate (Table 2, entry 1)**

The title compound was prepared according to the general procedure as described above in 90% yield.  $[\alpha]_{\text{D}}^{25} = -14.6$  (*c* 0.82,  $\text{CHCl}_3$ );  $^1\text{H NMR}$  ( $\text{CDCl}_3$ , TMS, 300 MHz)  $\delta$  7.24 (m, 4H), 4.61 (d, *J* = 5.7 Hz, 1H), 3.78-3.71 (m, 6H), 3.41 (br, 1H), 2.76 (d, *J* = 6.0 Hz, 1H), 0.92-0.60 (m, 7H);  $^{13}\text{C NMR}$  ( $\text{CDCl}_3$ , TMS, 75 MHz)  $\delta$  172.01, 171.57, 136.43, 133.07, 128.43, 127.66, 65.49, 64.34, 60.30, 58.47, 52.07, 29.42, 15.52, 13.88, 8.05; IR (KBr)  $\nu$  3685, 3624, 3019, 2977, 2400, 1731, 1519, 1426, 1215, 1045, 929, 756  $\text{cm}^{-1}$ . HRMS: calcd. for  $\text{C}_{17}\text{H}_{20}\text{ClNO}_4$ : 337.1076, found. 337.1075. dr > 98:2; 98% ee, HPLC (Chiralcel AS-H, *i*-propanol/hexane = 10/90, flow rate 1.0 mL/min,  $\lambda$  = 220 nm);  $t_{\text{r}}$  = 6.69 and 9.80 min.

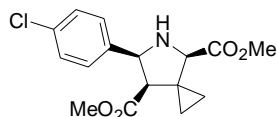

**(3ba)**

**(4R,6S,7R)-dimethyl 6-(4-chlorophenyl)-5-azaspiro[2.4]heptane-4,7-dicarboxylate (Table 1, entry 9)**

The title compound was prepared according to the general procedure as described above in 87% yield.  $[\alpha]_D^{25} = -15.0$  (*c* 0.64, CHCl<sub>3</sub>); <sup>1</sup>H NMR (CDCl<sub>3</sub>, TMS, 300 MHz)  $\delta$  7.23 (m, 4H), 4.61 (d, *J* = 5.7 Hz, 1H), 3.75-3.72 (m, 4H), 3.39 (br, 1H), 3.28 (s, 3H), 2.77 (d, *J* = 5.4 Hz, 1H), 0.92-0.61 (m, 7H); <sup>13</sup>C NMR (CDCl<sub>3</sub>, TMS, 75 MHz)  $\delta$  172.74, 171.86, 136.58, 133.43, 128.77, 127.86, 65.68, 64.67, 60.56, 58.63, 52.39, 51.53, 15.83, 8.27; IR (KBr)  $\nu$  3684, 3626, 3018, 2978, 2401, 1730, 1518, 1427, 1214, 1046, 930, 757 cm<sup>-1</sup>. *dr* = 86:14; 98% *ee*, HPLC (Chiralcel AS-H, *i*-propanol/hexane = 10/90, flow rate 1.0 mL/min,  $\lambda$  = 220 nm); *t<sub>r</sub>* = 8.15 and 13.19 min.

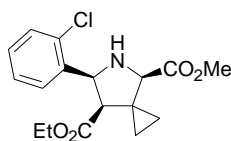

**(3ab)**

**(4R,6S,7R)-7-ethyl 4-methyl 6-(2-chlorophenyl)-5-azaspiro[2.4]heptane-4,7-dicarboxylate (Table 2, entry 2)**

The title compound was prepared according to the general procedure as described above in 97% yield.  $[\alpha]_D^{25} = -63.2$  (*c* 0.84, CHCl<sub>3</sub>); <sup>1</sup>H NMR (CDCl<sub>3</sub>, TMS, 300 MHz)  $\delta$  7.43 (d, *J* = 6.6 Hz, 1H), 7.29 (d, *J* = 7.2 Hz, 1H), 7.24-7.16 (m, 2H), 4.88 (s, 1H), 3.74 (m, 4H), 3.64 (q, *J* = 6.9 Hz, 7.2 Hz, 2H), 3.09 (s, 1H), 2.92 (br, 1H), 0.95-0.59 (m, 7H); <sup>13</sup>C NMR (CDCl<sub>3</sub>, TMS, 75 MHz)  $\delta$  172.02, 135.30, 133.26, 129.36, 128.68, 126.87, 126.75, 65.15, 62.46, 60.09, 56.44, 52.10, 29.33, 15.44, 13.85, 8.45; IR (KBr)  $\nu$  3683, 3625, 3020, 2976, 2401, 1732, 1520, 1425, 1214, 1047, 926, 754 cm<sup>-1</sup>. HRMS calcd. for C<sub>17</sub>H<sub>20</sub>ClNO<sub>4</sub>: 337.1081, found 337.1080. *dr* = 97:3; 97% *ee*, HPLC (Chiralcel AS-H, *i*-propanol/hexane = 10/90, flow rate 1.0 mL/min,  $\lambda$  = 220 nm); *t<sub>r</sub>* = 5.81 and 11.27 min.

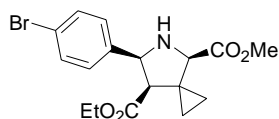

**(3ac)**

**(4R,6S,7R)-7-ethyl 4-methyl 6-(4-bromophenyl)-5-azaspiro[2.4]heptane-4,7-dicarboxylate (Table 2, entry 3)**

The title compound was prepared according to the general procedure as described above in 87% yield.  $[\alpha]_D^{25} = -16.5$  (*c* 0.46, CHCl<sub>3</sub>); <sup>1</sup>H NMR (CDCl<sub>3</sub>, TMS, 300 MHz)  $\delta$  7.39 (d, *J* = 7.8 Hz, 2H), 7.18 (d, *J* = 8.1 Hz, 2H), 4.59 (d, *J* = 5.1 Hz, 1H), 3.78-3.71 (m, 6H), 3.17 (br, 1H), 2.76 (d, *J* = 4.8 Hz, 1H), 0.92-0.60 (m, 7H); <sup>13</sup>C NMR (CDCl<sub>3</sub>, TMS, 75 MHz)  $\delta$  171.99, 171.58, 137.00, 131.32, 127.97, 121.12, 65.44, 64.37, 60.26, 58.39, 52.05, 29.43, 15.48, 13.86, 8.03; IR (KBr)  $\nu$  3683, 3622, 3017, 2979, 2402, 1735, 1515, 1423, 1217, 1045, 924, 759 cm<sup>-1</sup>. HRMS calcd. for C<sub>17</sub>H<sub>20</sub>BrNO<sub>4</sub>: 381.0576, found 381.0568. *dr* = 95:5; 98% ee, HPLC (Chiralcel AS-H, *i*-propanol/hexane = 10/90, flow rate 1.0 mL/min,  $\lambda$  = 220 nm); *t<sub>r</sub>* = 7.07 and 11.14 min.

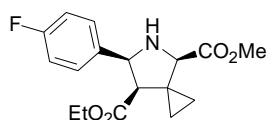

**(3ad)**

**(4R,6S,7R)-7-ethyl 4-methyl 6-(4-fluorophenyl)-5-azaspiro[2.4]heptane-4,7-dicarboxylate (Table 2, entry 4)**

The title compound was prepared according to the general procedure as described above in 85% yield.  $[\alpha]_D^{25} = -15.6$  (*c* 0.64, CHCl<sub>3</sub>); <sup>1</sup>H NMR (CDCl<sub>3</sub>, TMS, 300 MHz)  $\delta$  7.27 (d, *J* = 6.6 Hz, 2H), 6.96 (t, *J* = 8.4 Hz, 2H), 4.63 (d, *J* = 5.7 Hz, 1H), 3.77-3.72 (m, 6H), 3.37 (br, 1H), 2.75 (d, *J* = 5.1 Hz, 1H), 0.92-0.60 (m, 7H); <sup>13</sup>C NMR (CDCl<sub>3</sub>, TMS, 75 MHz)  $\delta$  172.11, 171.63, 163.57, 133.62, 127.93, 115.29, 115.00, 65.52, 60.21, 58.65, 52.05, 29.39, 15.52, 13.86, 8.03; IR (KBr)  $\nu$  3681, 3622, 3021, 2980, 2403, 1733, 1516, 1429, 1217, 1049, 924, 751 cm<sup>-1</sup>. HRMS calcd. for C<sub>17</sub>H<sub>20</sub>FNO<sub>4</sub>: 321.1376, found 321.1374. *dr* = 97:3; 97% ee, HPLC (Chiralcel AS-H,

*i*-propanol/hexane = 10/90, flow rate 1.0 mL/min,  $\lambda$  = 220 nm);  $t_r$  = 6.58 and 9.39 min.

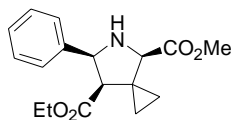

**(3ae)**

**(4*R*,6*S*,7*R*)-7-ethyl 4-methyl 6-phenyl-5-azaspiro[2.4]heptane-4,7-dicarboxylate**

**(Table 2, entry 5)**

The title compound was prepared according to the general procedure as described above in 81% yield.  $[\alpha]_D^{25} = -20.3$  (*c* 0.54, CHCl<sub>3</sub>); <sup>1</sup>H NMR (CDCl<sub>3</sub>, TMS, 300 MHz)  $\delta$  7.31-7.18 (m, 5H), 4.67 (d, *J* = 5.7 Hz, 1H), 3.75-3.67 (m, 6H), 3.42 (br, 1H), 2.78 (d, *J* = 5.7 Hz, 1H), 0.93-0.60 (m, 7H); <sup>13</sup>C NMR (CDCl<sub>3</sub>, TMS, 75 MHz)  $\delta$  172.22, 171.68, 137.77, 128.27, 127.29, 126.17, 65.59, 64.97, 60.11, 58.76, 52.02, 29.38, 15.54, 13.78, 8.06; IR (KBr)  $\nu$  3681, 3620, 3015, 2972, 2397, 1728, 1523, 1429, 1211, 1040, 926, 759 cm<sup>-1</sup>. HRMS calcd. for C<sub>17</sub>H<sub>21</sub>NO<sub>4</sub>: 303.1471, found 303.1478. dr = 95:5; 95% ee, HPLC (Chiralcel AS-H, *i*-propanol/hexane = 10/90, flow rate 1.0 mL/min,  $\lambda$  = 220 nm);  $t_r$  = 6.06 and 9.36 min.

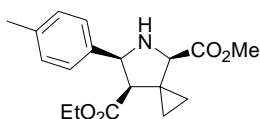

**(3af)**

**(4*R*,6*S*,7*R*)-7-ethyl 4-methyl 6-*p*-tolyl-5-azaspiro[2.4]heptane-4,7-dicarboxylate**

**(Table 2, entry 6)**

The title compound was prepared according to the general procedure as described above in 78% yield.  $[\alpha]_D^{25} = -14.7$  (*c* 0.64, CHCl<sub>3</sub>); <sup>1</sup>H NMR (CDCl<sub>3</sub>, TMS, 300 MHz)  $\delta$  7.17 (d, *J* = 8.1 Hz, 2H), 7.06 (d, *J* = 8.7 Hz, 2H), 4.64 (d, *J* = 5.7 Hz, 1H), 3.77-3.70 (m, 6H), 2.75 (d, *J* = 5.7 Hz, 1H), 2.25 (s, 3H), 0.94-0.61 (m, 7H); <sup>13</sup>C NMR (CDCl<sub>3</sub>, TMS, 75 MHz)  $\delta$  172.31, 171.66, 136.93, 134.57, 128.95, 126.04, 65.56, 64.81, 60.14, 58.79, 52.05, 29.33, 21.03, 15.58, 13.84, 8.02; IR (KBr)  $\nu$  3682, 3623, 3016, 2975, 2403, 1727, 1521, 1422, 1214, 1043, 927, 754 cm<sup>-1</sup>. HRMS calcd.

for C<sub>18</sub>H<sub>23</sub>NO<sub>4</sub>: 317.1627, found 317.1625. dr = 96:4; 97% ee, HPLC (Chiralcel AS-H, *i*-propanol/hexane = 10/90, flow rate 1.0 mL/min, λ = 220 nm); t<sub>r</sub> = 5.84 and 9.39 min.

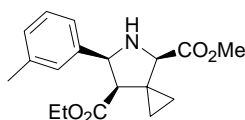

**(3ag)**

**(4R,6S,7R)-7-ethyl 4-methyl 6-*m*-tolyl-5-azaspiro[2.4]heptane-4,7-dicarboxylate**

**(Table 2, entry 7)**

The title compound was prepared according to the general procedure as described above in 90% yield.  $[\alpha]_D^{25} = -7.3$  (*c* 0.76, CHCl<sub>3</sub>); <sup>1</sup>H NMR (CDCl<sub>3</sub>, TMS, 300 MHz) δ 7.20-6.99 (m, 4H), 4.64 (m 1H), 3.78-3.73 (m, 6H), 2.78 (s, 1H), 2.27 (s, 3H), 0.93-0.62 (m, 7H); <sup>13</sup>C NMR (CDCl<sub>3</sub>, TMS, 75 MHz) δ 172.32, 171.74, 137.77, 128.11, 127.90, 126.84, 123.18, 65.60, 64.94, 60.01, 58.78, 51.94, 29.44, 21.39, 15.48, 13.77, 8.08; IR (KBr) ν 3685, 3623, 3020, 2974, 2399, 1730, 1518, 1425, 1213, 1043, 932, 754 cm<sup>-1</sup>. HRMS calcd. for C<sub>18</sub>H<sub>23</sub>NO<sub>4</sub>: 317.1627, found 317.1631. dr > 98:2; 98% ee, HPLC (Chiralcel AS-H, *i*-propanol/hexane = 10/90, flow rate 1.0 mL/min, λ = 220 nm); t<sub>r</sub> = 5.57 and 8.72 min.

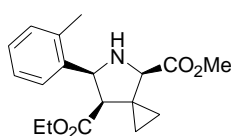

**(3ah)**

**(4R,6S,7R)-7-ethyl 4-methyl 6-*o*-tolyl-5-azaspiro[2.4]heptane-4,7-dicarboxylate**

**(Table 2, entry 8)**

The title compound was prepared according to the general procedure as described above in 87% yield.  $[\alpha]_D^{25} = -43.5$  (*c* 0.72, CHCl<sub>3</sub>); <sup>1</sup>H NMR (CDCl<sub>3</sub>, TMS, 300 MHz) δ 7.32 (d, *J* = 6.6 Hz, 1H), 7.12-7.08 (m, 3H), 4.74 (s, 1H), 3.74 (m, 4H), 3.60 (q, *J* = 7.2 Hz, 2H), 3.37 (br, 1H), 2.83 (d, *J* = 5.1 Hz, 1H), 2.29 (s, 3H), 0.98-0.54 (m, 7H); <sup>13</sup>C NMR (CDCl<sub>3</sub>, TMS, 75 MHz) δ 172.07, 135.49, 130.26, 127.36, 125.92, 124.71,

65.29, 62.60, 60.09, 57.20, 52.09, 29.32, 19.75, 15.50, 13.79, 8.60; IR (KBr)  $\nu$  3685, 3624, 3020, 2980, 2402, 1732, 1518, 1425, 1214, 1043, 929, 756  $\text{cm}^{-1}$ . HRMS calcd. for  $\text{C}_{18}\text{H}_{23}\text{NO}_4$ : 317.1627; found 317.1626. dr > 98:2; 96% ee, HPLC (Chiralcel AS-H, *i*-propanol/hexane = 10/90, flow rate 1.0 mL/min,  $\lambda$  = 220 nm);  $t_r$  = 5.30 and 10.94 min.

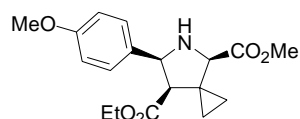

**(3ai)**

**(4*R*,6*S*,7*R*)-7-ethyl 4-methyl 6-(4-methoxyphenyl)-5-azaspiro[2.4]heptane-4,7-dicarboxylate (Table 2, entry 9)**

The title compound was prepared according to the general procedure as described above in 78% yield.  $[\alpha]_D^{25} = -3.2$  (*c* 0.64,  $\text{CHCl}_3$ );  $^1\text{H}$  NMR ( $\text{CDCl}_3$ , TMS, 300 MHz)  $\delta$  7.22 (d, *J* = 6.6 Hz, 2H), 6.79 (d, *J* = 5.1 Hz, 2H), 4.63 (d, *J* = 5.7 Hz, 1H), 3.78-3.72 (m, 9H), 2.74 (d, *J* = 5.7 Hz, 1H), 0.95-0.61 (m, 7H);  $^{13}\text{C}$  NMR ( $\text{CDCl}_3$ , TMS, 75 MHz)  $\delta$  172.77, 172.15, 159.08, 130.24, 127.71, 114.00, 65.98, 64.92, 60.51, 59.27, 55.58, 52.39, 15.92, 14.27, 8.42; IR (KBr)  $\nu$  3685, 3624, 3019, 2977, 2400, 1731, 1519, 1426, 1215, 1045, 929, 756  $\text{cm}^{-1}$ . HRMS calcd. for  $\text{C}_{18}\text{H}_{23}\text{NO}_5$ : 333.1576; found 333.1572. dr > 98:2; 98% ee, HPLC (Chiralcel AS-H, *i*-propanol/hexane = 10/90, flow rate 1.0 mL/min,  $\lambda$  = 220 nm);  $t_r$  = 9.12 and 12.63 min.

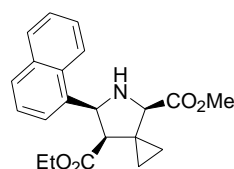

**(3aj)**

**(4*R*,6*S*,7*R*)-7-ethyl 4-methyl 6-(naphthalen-1-yl)-5-azaspiro[2.4]heptane-4,7-dicarboxylate (Table 2, entry 10)**

The title compound was prepared according to the general procedure as described above in 82% yield.  $[\alpha]_D^{25} = -145.7$  (*c* 0.90,  $\text{CHCl}_3$ );  $^1\text{H}$  NMR ( $\text{CDCl}_3$ , TMS, 300



MHz)  $\delta$  7.92 (d,  $J = 8.7$  Hz, 1H), 7.68 (d,  $J = 7.8$  Hz, 1H), 7.70 (d,  $J = 8.1$  Hz, 1H), 7.54-7.37 (m, 4H), 5.32 (m 1H), 3.84 (s, 1H), 3.74 (s, 3H), 3.46 (q,  $J = 7.2$  Hz, 2H), 3.06 (d,  $J = 5.1$  Hz, 1H), 0.99-0.46 (m, 7H),  $^{13}\text{C}$  NMR ( $\text{CDCl}_3$ , TMS, 75 MHz)  $\delta$  171.82, 133.42, 132.92, 131.03, 128.82, 128.07, 126.13, 125.44, 125.08, 122.74, 122.53, 65.14, 61.88, 59.78, 58.64, 51.97, 29.63, 15.40, 13.46, 8.49; IR (KBr)  $\nu$  3683, 3622, 3017, 2979, 2403, 1734, 1517, 1426, 1215, 1045, 929, 756  $\text{cm}^{-1}$ . HRMS calcd. for  $\text{C}_{21}\text{H}_{23}\text{NO}_4$ : 353.1627, found 353.1628. dr > 98:2; 92% ee, HPLC (Chiralcel AS-H, *i*-propanol/hexane = 10/90, flow rate 1.0 mL/min,  $\lambda = 220$  nm);  $t_r = 11.28$  and 15.66 min.

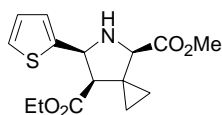

**(3ak)**

**(4*R*,6*S*,7*R*)-7-ethyl 4-methyl 6-(thiophen-2-yl)-5-azaspiro[2.4]heptane-4,7-dicarboxylate (Table 2, entry 11)**

The title compound was prepared according to the general procedure as described above in 89% yield.  $[\alpha]_D^{25} = -3.0$  ( $c$  0.30,  $\text{CHCl}_3$ );  $^1\text{H}$  NMR ( $\text{CDCl}_3$ , TMS, 300 MHz)  $\delta$  7.15 (d,  $J = 4.8$  Hz, 1H), 6.92-6.84 (m, 2H), 4.74 (m, 1H), 3.87 (q,  $J = 7.4$  Hz, 2H), 3.73 (s, 1H), 3.70 (s, 3H), 2.76 (d,  $J = 5.4$  Hz, 1H), 0.98-0.62 (m, 7H);  $^{13}\text{C}$  NMR ( $\text{CDCl}_3$ , TMS, 75 MHz)  $\delta$  171.93, 171.17, 140.70, 126.48, 124.01, 123.89, 65.43, 61.33, 60.15, 58.64, 51.77, 29.44, 15.31, 13.71, 7.71; IR (KBr)  $\nu$  3684, 3623, 3019, 2977, 2400, 1730, 1519, 1427, 1215, 1045, 929, 756  $\text{cm}^{-1}$ . HRMS: calcd. for  $\text{C}_{15}\text{H}_{19}\text{NO}_4\text{S}$ : 309.1039, found 309.1041. dr > 98:2; 94% ee, HPLC (Chiralcel AS-H, *i*-propanol/hexane = 10/90, flow rate 1.0 mL/min,  $\lambda = 220$  nm);  $t_r = 9.57$  and 16.36 min.

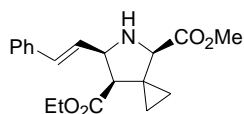

**(3al)**

**(4R,6R,7R)-7-ethyl 4-methyl 6-styryl-5-azaspiro[2.4]heptane-4,7-dicarboxylate**

**(Table 2, entry 12)**

The title compound was prepared according to the general procedure as described above in 87% yield.  $[\alpha]_D^{25} = -17.8$  (*c* 0.56, CHCl<sub>3</sub>); <sup>1</sup>H NMR (CDCl<sub>3</sub>, TMS, 300 MHz)  $\delta$  7.37-7.24 (m, 5H), 6.71 (d, *J* = 15.9 Hz, 1H), 6.24 (dd, *J* = 6.3 Hz, 15.9 Hz, 1H), 4.33-4.28 (m, 1H), 4.13-4.06 (m, 2H), 3.77-3.72 (m, 4H), 2.61 (d, *J* = 5.1 Hz, 1H), 1.18-0.71 (m, 7H); <sup>13</sup>C NMR (CDCl<sub>3</sub>, TMS, 75 MHz)  $\delta$  172.31, 171.57, 136.36, 133.07, 128.53, 127.85, 126.44, 125.05, 65.49, 63.66, 60.45, 57.86, 52.08, 29.64, 15.58, 14.36, 7.76; IR (KBr)  $\nu$  3684, 3624, 3019, 2977, 2403, 1731, 1519, 1426, 1216, 1045, 929, 756 cm<sup>-1</sup>. HRMS calcd. for C<sub>19</sub>H<sub>23</sub>NO<sub>4</sub>: 329.1627, found 329.1627. *dr* > 98:2; 93% *ee*, HPLC (Chiralcel AS-H, *i*-propanol/hexane = 10/90, flow rate 1.0 mL/min,  $\lambda$  = 220 nm); *t<sub>r</sub>* = 6.86 and 11.33 min.

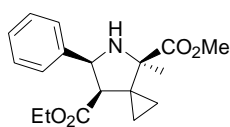

**(3am)**

**(4R,6S,7R)-7-ethyl 4-methyl 4-methyl-6-phenyl-5-azaspiro[2.4]heptane-4,7-dicarboxylate (Figure 2)**

The title compound was prepared according to the general procedure as described above in 89% yield.  $[\alpha]_D^{25} = +10.7$  (*c* 0.90, CHCl<sub>3</sub>); <sup>1</sup>H NMR (CDCl<sub>3</sub>, TMS, 300 MHz)  $\delta$  7.31-7.17 (m, 5H), 4.76 (d, *J* = 6.0 Hz, 1H), 3.74 (s, 3H), 3.68 (q, *J* = 7.2 Hz, 2H), 2.82 (d, *J* = 6.6 Hz, 1H), 1.35 (s, 3H), 0.95-0.66 (m, 7H); <sup>13</sup>C NMR (CDCl<sub>3</sub>, TMS, 75 MHz)  $\delta$  175.00, 172.52, 138.43, 132.65, 128.44, 126.54, 67.07, 62.95, 61.02, 60.24, 52.54, 34.37, 24.64, 14.02, 13.00, 9.39; IR (KBr)  $\nu$  3688, 3624, 3019, 2981, 2400, 1731, 1523, 1426, 1215, 1050, 929, 756 cm<sup>-1</sup>. *dr* > 98:2; 98% *ee*, HPLC (Chiralcel AS-H, *i*-propanol/hexane = 5/95, flow rate 1.0 mL/min,  $\lambda$  = 220 nm); *t<sub>r</sub>* = 7.84 and 8.72 min.

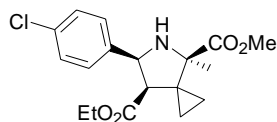

**(3an)**

**(4R,6S,7R)-7-ethyl 4-methyl 6-(4-chlorophenyl)-4-methyl-5-azaspiro[2.4]heptane-4,7-dicarboxylate (Figure 2)**

The title compound was prepared according to the general procedure as described above in 87% yield.  $[\alpha]_D^{25} = +10.9$  (*c* 0.84, CHCl<sub>3</sub>); <sup>1</sup>H NMR (CDCl<sub>3</sub>, TMS, 300 MHz)  $\delta$  7.24 (m, 4H), 4.75 (d, *J* = 6.3 Hz, 1H), 3.74-3.69 (m, 5H), 2.80 (d, *J* = 6.3 Hz, 1H), 1.36 (s, 3H), 0.93-0.69 (m, 7H); <sup>13</sup>C NMR (CDCl<sub>3</sub>, TMS, 75 MHz)  $\delta$  171.95, 136.60, 133.05, 128.39, 127.79, 66.94, 62.09, 60.23, 52.44, 33.96, 29.67, 24.14, 13.85, 12.76, 9.00; IR (KBr)  $\nu$  3685, 3620, 3019, 2977, 2400, 1730, 1519, 1426, 1215, 1045, 931, 756 cm<sup>-1</sup>. HRMS calcd. for C<sub>18</sub>H<sub>22</sub>ClNO<sub>4</sub>: 351.1237, found 351.1239. *dr* > 98:2; 97% ee, HPLC (Chiralcel AS-H, *i*-propanol/hexane = 5/95, flow rate 1.0 mL/min,  $\lambda$  = 220 nm); *t<sub>r</sub>* = 8.94 and 12.17 min.

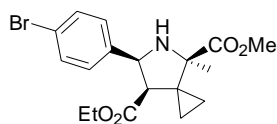

**(3ao)**

**(4R,6S,7R)-7-ethyl 4-methyl 6-(4-bromophenyl)-4-methyl-5-azaspiro[2.4]heptane-4,7-dicarboxylate (Figure 2)**

The title compound was prepared according to the general procedure as described above in 88% yield.  $[\alpha]_D^{25} = +7.8$  (*c* 0.90, CHCl<sub>3</sub>); <sup>1</sup>H NMR (CDCl<sub>3</sub>, TMS, 300 MHz)  $\delta$  7.38 (d, *J* = 8.1 Hz, 2H), 7.18 (d, *J* = 8.4 Hz, 2H), 4.65 (d, *J* = 6.0 Hz, 1H), 3.72-3.67 (m, 5H), 2.78 (d, *J* = 6.3 Hz, 1H), 1.31 (s, 3H), 0.88-0.64 (m, 7H); <sup>13</sup>C NMR (CDCl<sub>3</sub>, TMS, 75 MHz)  $\delta$  174.54, 171.92, 137.23, 131.27, 128.12, 121.08, 66.87, 62.10, 60.14, 52.36, 33.99, 29.63, 24.15, 13.82, 12.71, 8.98; IR (KBr)  $\nu$  3685, 3625, 3020, 2977, 2399, 1731, 1521, 1426, 1219, 1045, 929, 756 cm<sup>-1</sup>. *dr* = 95:5; 97% ee, HPLC (Chiralcel AS-H, *i*-propanol/hexane = 5/95, flow rate 1.0 mL/min,  $\lambda$  = 220 nm); *t<sub>r</sub>* = 9.62 and 12.51 min.

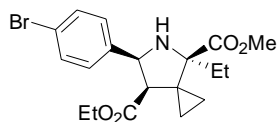

**(3ap)**

**(4*R*,6*S*,7*R*)-7-ethyl 4-methyl 6-(4-bromophenyl)-4-ethyl-5-azaspiro[2.4]heptane-4,7-dicarboxylate (Figure 2)**

The title compound was prepared according to the general procedure as described above in 74% yield.  $[\alpha]_D^{25} = +15.9$  (*c* 0.72, CHCl<sub>3</sub>); <sup>1</sup>H NMR (CDCl<sub>3</sub>, TMS, 300 MHz)  $\delta$  7.42 (d, *J* = 8.4 Hz, 2H), 7.25 (d, *J* = 8.1 Hz, 2H), 4.61 (d, *J* = 6.0 Hz, 1H), 3.77-3.71 (m, 5H), 2.76 (d, *J* = 6.3 Hz, 1H), 1.58 (m, 2H), 1.01-0.68 (m, 10H); <sup>13</sup>C NMR (CDCl<sub>3</sub>, TMS, 75 MHz)  $\delta$  174.33, 172.11, 137.77, 131.23, 128.25, 120.99, 70.50, 62.26, 60.71, 52.12, 33.60, 29.66, 11.98, 9.63, 8.44; IR (KBr)  $\nu$  3685, 3623, 3019, 2977, 2407, 1731, 1519, 1431, 1215, 1045, 929, 756 cm<sup>-1</sup>. HRMS calcd. for C<sub>19</sub>H<sub>24</sub>BrNO<sub>4</sub>: 409.0889, found 409.0886. *dr* > 98:2; 97% ee, HPLC (Chiralcel AS-H, *i*-propanol/hexane = 5/95, flow rate 1.0 mL/min,  $\lambda$  = 220 nm); *t<sub>r</sub>* = 6.44 and 7.72 min.

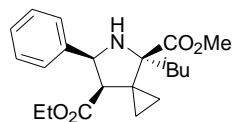

**(3aq)**

**(4*R*,6*S*,7*R*)-7-ethyl 4-methyl 4-isobutyl-6-phenyl-5-azaspiro[2.4]heptane-4,7-dicarboxylate (Figure 2)**

The title compound was prepared according to the general procedure as described above in 81% yield.  $[\alpha]_D^{25} = +13.5$  (*c* 0.78, CHCl<sub>3</sub>); <sup>1</sup>H NMR (CDCl<sub>3</sub>, TMS, 300 MHz)  $\delta$  7.32-7.15 (m, 5H), 4.60 (d, *J* = 6.3 Hz, 1H), 3.69-3.61 (m, 5H), 2.84 (d, *J* = 6.3 Hz, 1H), 1.57-1.52 (m, 3H), 0.90-0.53 (m, 13H); <sup>13</sup>C NMR (CDCl<sub>3</sub>, TMS, 75 MHz)  $\delta$  174.38, 172.38, 138.63, 128.13, 127.05, 126.40, 69.54, 62.53, 60.41, 59.90, 51.87, 44.28, 35.35, 29.64, 25.19, 24.47, 22.38, 13.75, 11.74, 9.47; IR (KBr)  $\nu$  3686, 3623, 3019, 2979, 2400, 1734, 1519, 1426, 1215, 1045, 926, 756 cm<sup>-1</sup>. *dr* > 98:2; 97% ee, HPLC (Chiralcel AS-H, *i*-propanol/hexane = 5/95, flow rate 1.0 mL/min,  $\lambda$  = 220 nm); *t<sub>r</sub>* = 4.69 and 5.41 min.

## X-ray Crystal Structures of *endo*-Adducts (**4*R*,6*S*,7*R***)-**3aa** (absolute configuration)

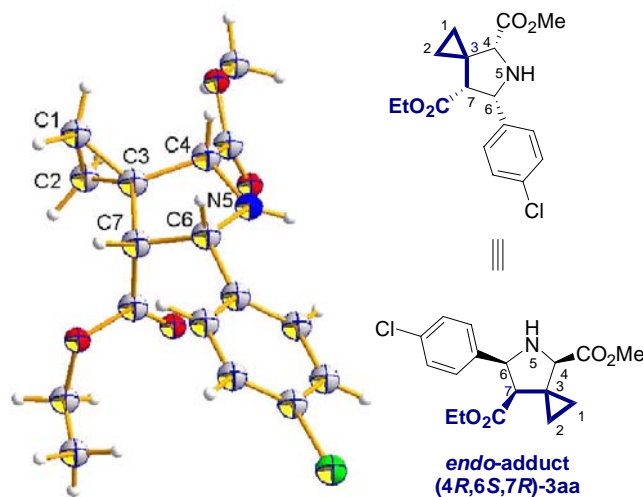

**Figure 1.** X-ray structure of (**4*R*,6*S*,7*R***)-**3aa**.

Crystal data for (**4*R*,6*S*,7*R***)-**3aa**:  $C_{17}H_{20}ClNO_4$ ,  $M_r = 337.79$ ,  $T = 298$  K, Monoclinic, space group  $P2(1)$ ,  $a = 9.479(2)$ ,  $b = 27.837(6)$ ,  $c = 13.143(4)$  Å,  $V = 3467.8(13)$  Å<sup>3</sup>,  $Z = 8$ , 7093 unique reflections, final  $R_1 = 0.0514$  and  $wR_2 = 0.1506$  for 11687 observed [ $I > 2\sigma(I)$ ] reflections. CCDC 785673 contains the supplementary crystallographic data for this paper. These data can be obtained free of charge via [www.ccdc.cam.ac.uk/conts/retrieving.html](http://www.ccdc.cam.ac.uk/conts/retrieving.html) (or from the Cambridge Crystallographic Data Centre, 12, Union Road, Cambridge CB21EZ, UK; fax: (+44) 1223-336-033; or [deposit@ccdc.cam.ac.uk](mailto:deposit@ccdc.cam.ac.uk))

### Proposed transition states of the *endo*-selectivity for asymmetric 1,3-dipolar cycloaddition of imino esters with 2-cyclopropylidene Acetate

Based on the relative and absolute configuration of (**4*R*,6*S*,7*R***)-**3aa** and previous studies,<sup>[1,3]</sup> a plausible transition state accounting for the observed *endo*-selectivity of the 1,3-DC addition of imino esters with ethyl 2-cyclopropylidene acetate in the presence of  $Cu(CH_3CN)_4BF_4/(S)$ -TF-BiphamPhos (**L1**) is shown in Figure 2. The *in situ*-formed azomethine ylide is coordinated to the metallic center and oriented in

such way because of the steric repulsion between the phenyl group in the ylide and the phenyl ring on the phosphorus atom of the chiral ligand, and the highly steric congestion imposed by the latter effectively blocks the dipolarophile ethyl 2-cyclopropylidene acetate (**1a**) approach from the *Re* (C=N) face of the azomethine ylide and forms the *endo*-(4*R*,6*S*,7*R*)-5-*aza*-spiro[2,4]-heptane through *Si* face attack, which is compatible with the experimental results. The carbonyl group of ethyl 2-cyclopropylidene acetate (**1a**) could coordinate with the Cu(I) center, which can stabilize the negatively charged oxygen atom in the proposed transition states.<sup>[4]</sup> It could not rule out the possible hydrogen bond interaction between the carbonyl group of dipolarophile **1a** and the NH<sub>2</sub> group of the chiral (*S*)-TF-BiphamPhos ligand (**L1**), which also facilitates stabilizing the proposed transition states.<sup>[3b,3c]</sup> Nevertheless, the real catalytic mechanism still needs further investigation.

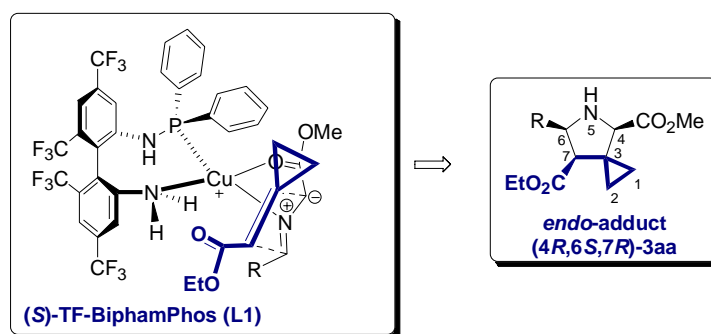

Figure 2. Proposed transition states leading to (4*R*,6*S*,7*R*)-5-*aza*-spiro[2,4]-heptanes.

## References

1. a) C.-J. Wang, G. Liang, Z.-Y. Xue, F. Gao, *J. Am. Chem. Soc.* **2008**, *130*, 17250; b) C.-J. Wang, Z.-Y. Xue, G. Liang, Z. Lu, *Chem. Commun.* **2009**, 2905; c) G. Liang, M.-C. Tong, C.-J. Wang, *Adv. Synth. Catal.* **2009**, *351*, 3101; d) Z.-Y. Xue, T.-L. Liu, Z. Lu.; H. Huang, H.-Y. Tao, C.-J. Wang, *Chem. Commun.* **2010**, *46*, 1727.
- 2 a) J.; Salaun, J. Marguerite, *Org. Synth. Coll. Vol.* *7*, 131; *Vol.* *63*, 147; b) J. R. Henderson, M. Parvez, B. A. Keay, *Org. Lett.* **2007**, *9*, 5167.
- 3 a) S. Cabrera, R. G. Arrayás, B. Martín-Matute, F. P. Cossío, J. C. Carretero, *Tetrahedron* **2007**, *63*, 6587; b) W. Zeng, G.-Y. Chen, Y.-G. Zhou, Y.-X. Li, *J. Am. Chem. Soc.* **2007**, *129*, 750; c) H. Y. Kim, H.-J. Shih, W. E. Knabe, K. Oh, *Angew. Chem., Int. Ed.* **2009**, *48*, 7420; d) J. M. Longmire, B. Wang, X. Zhang, *J. Am. Chem. Soc.* **2002**, *124*, 13400; e) W. Gao, X. Zhang, M. Raghunath, *Org. Lett.* **2005**, *7*, 4241.
- 4 X.-X. Yan, Q. Peng, Y. Zhang, K. Zhang, W. Hong, X.-L. Hou, Y.-D. Wu, *Angew. Chem., Int. Ed.* **2006**, *45*, 1979.

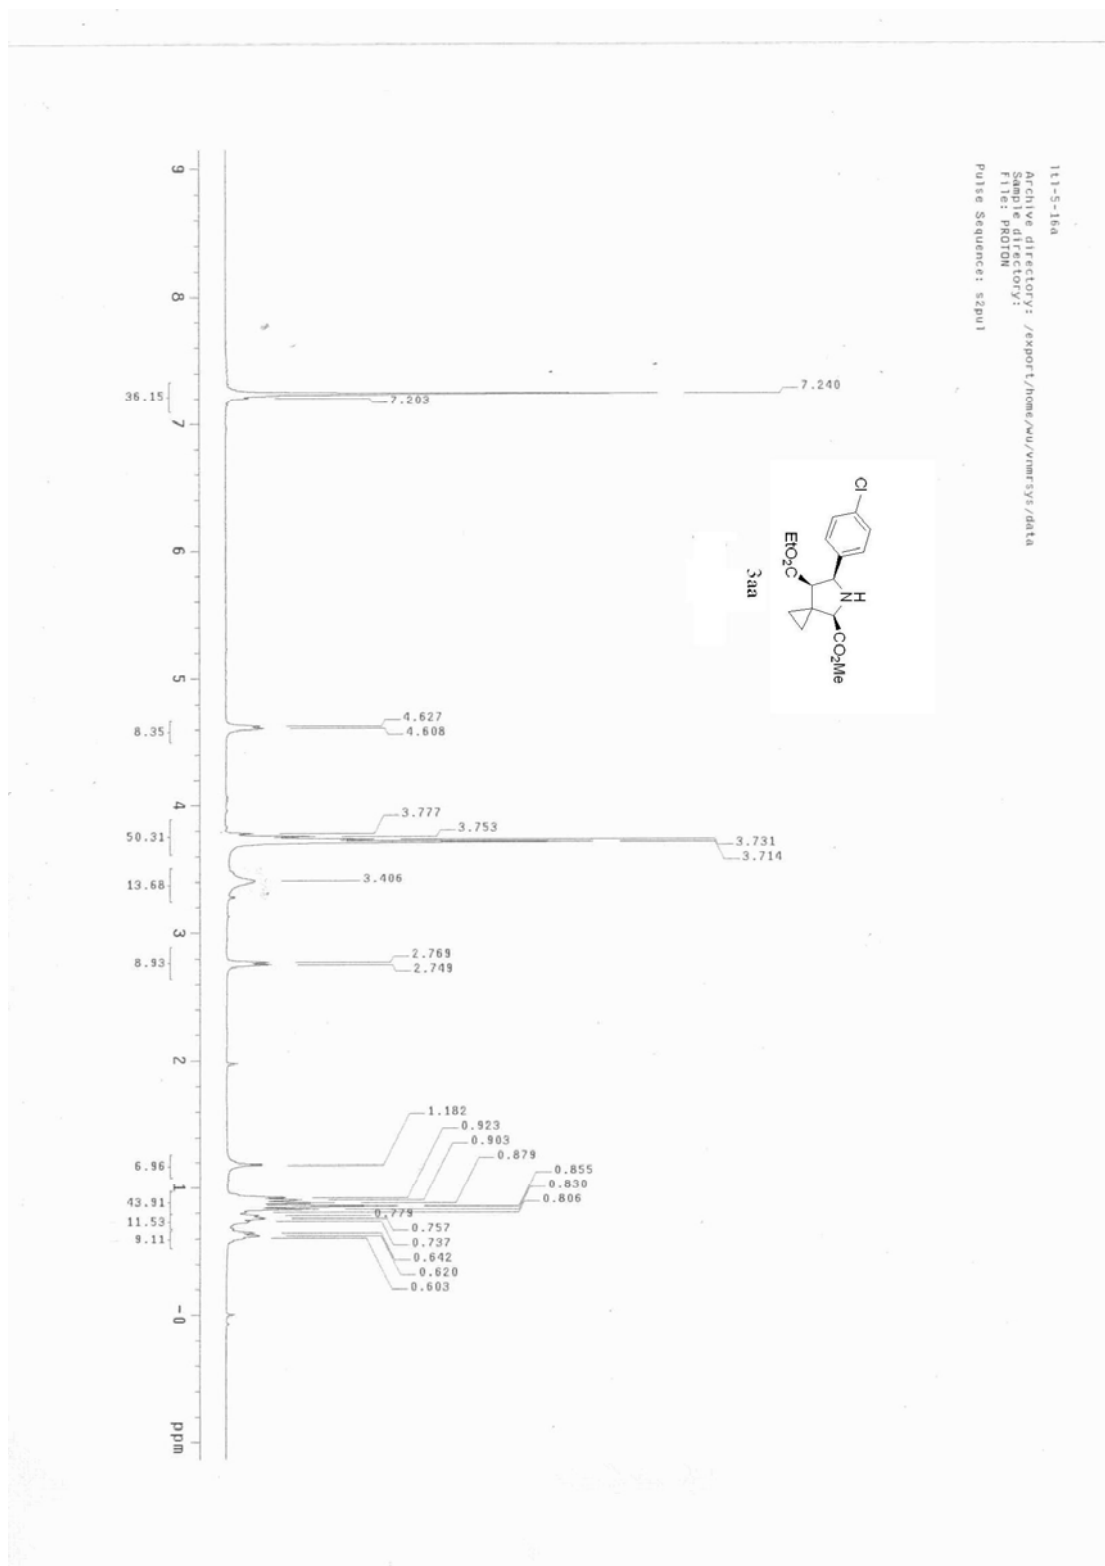



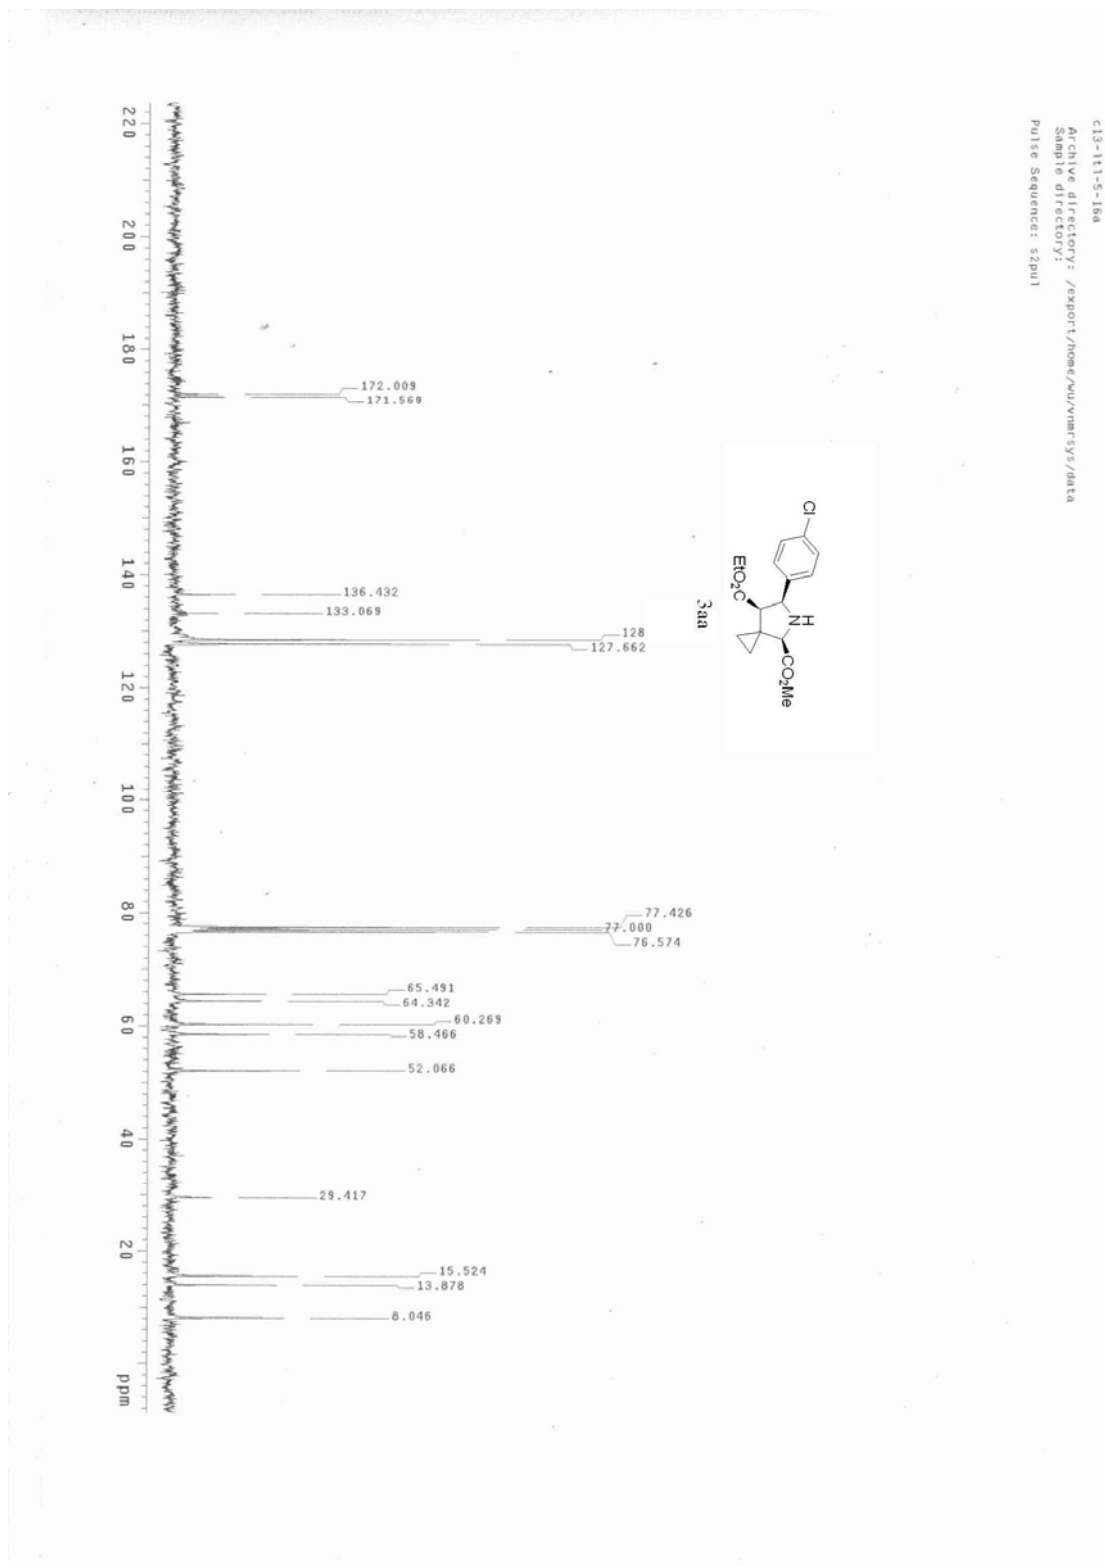

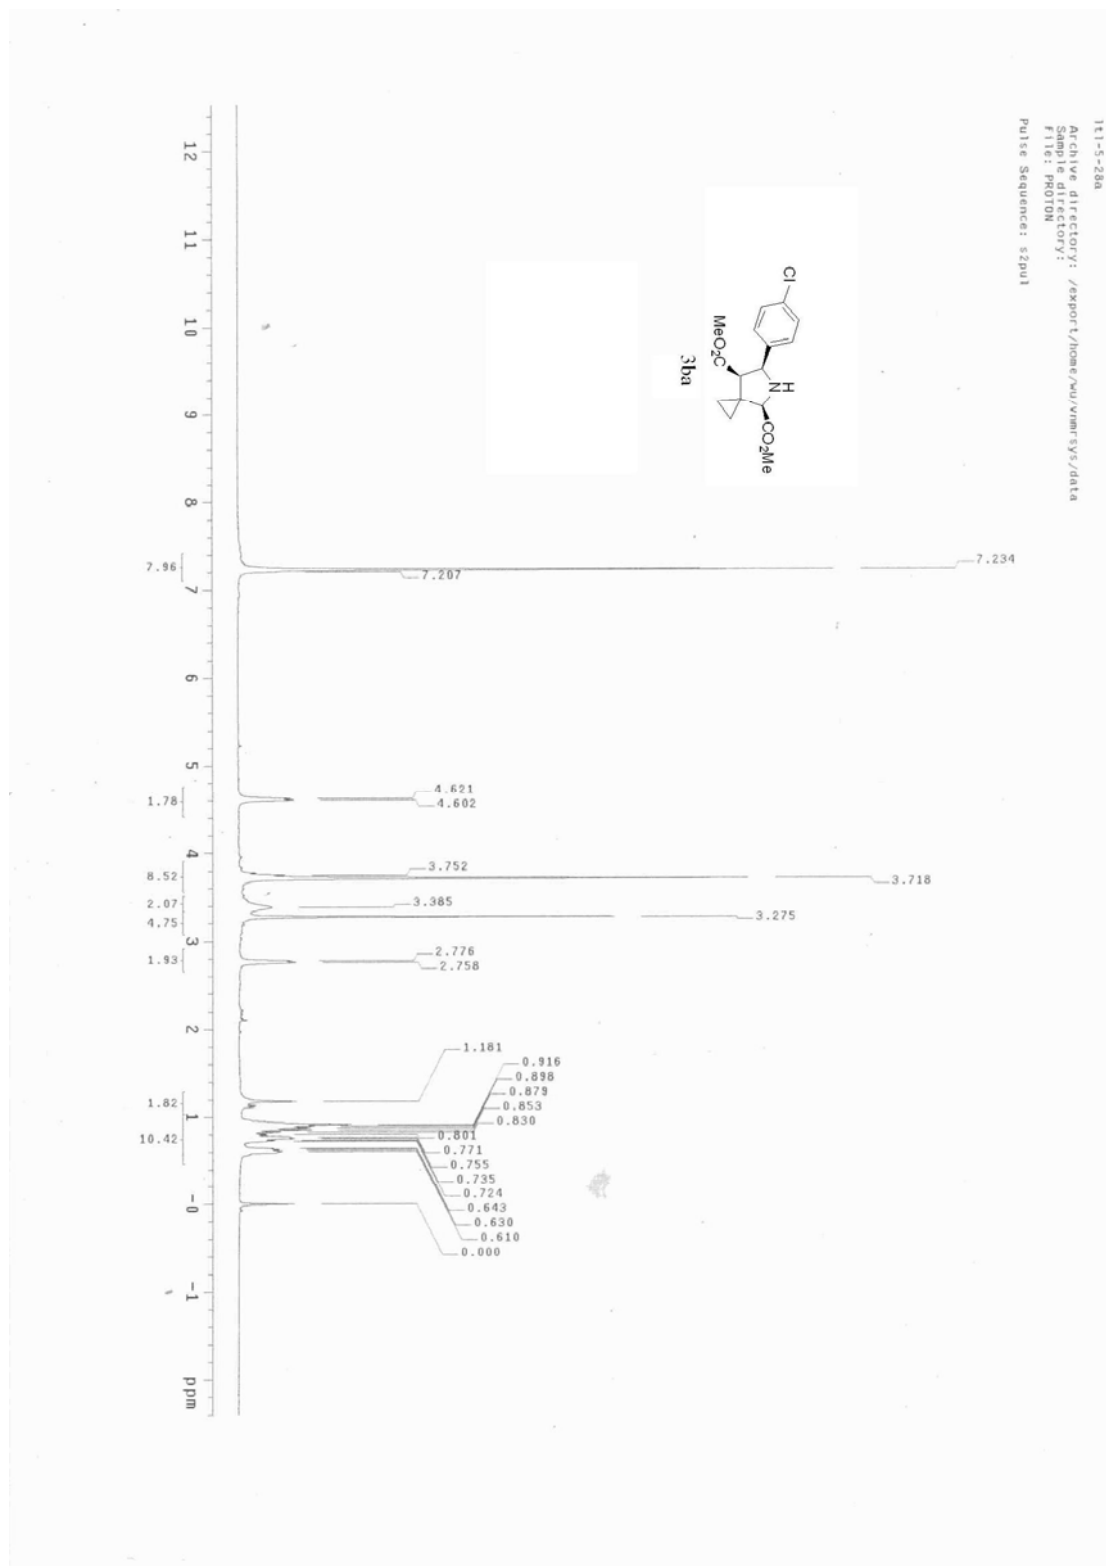

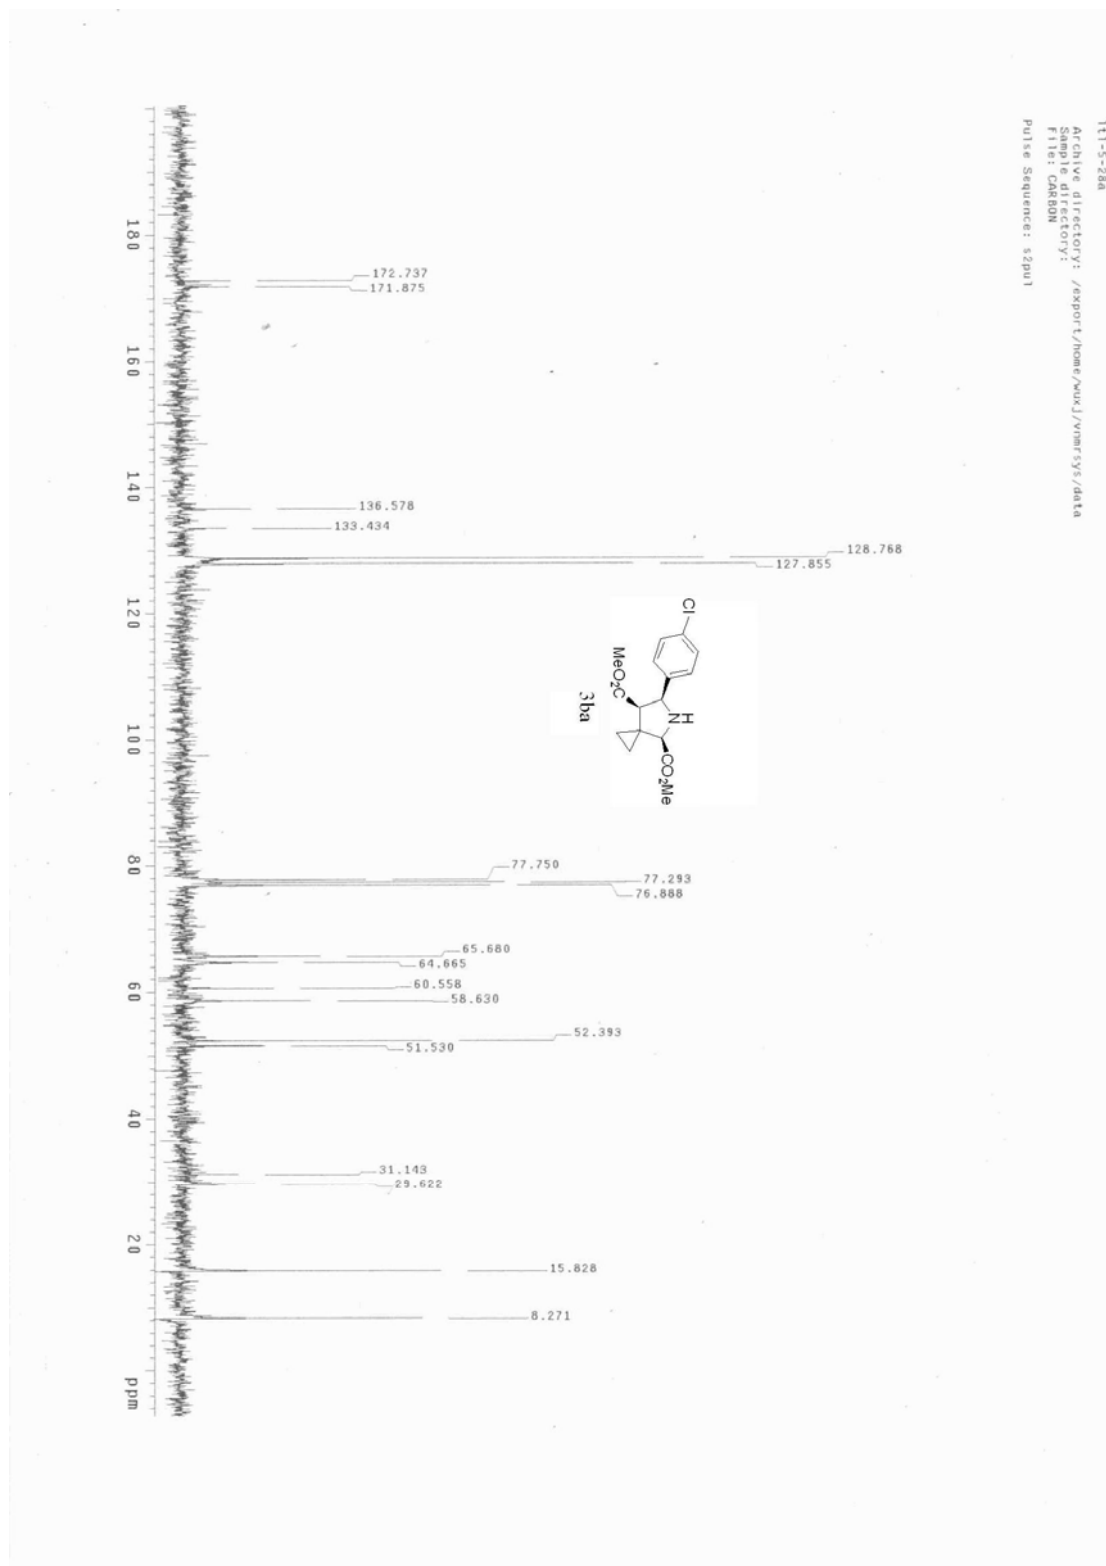

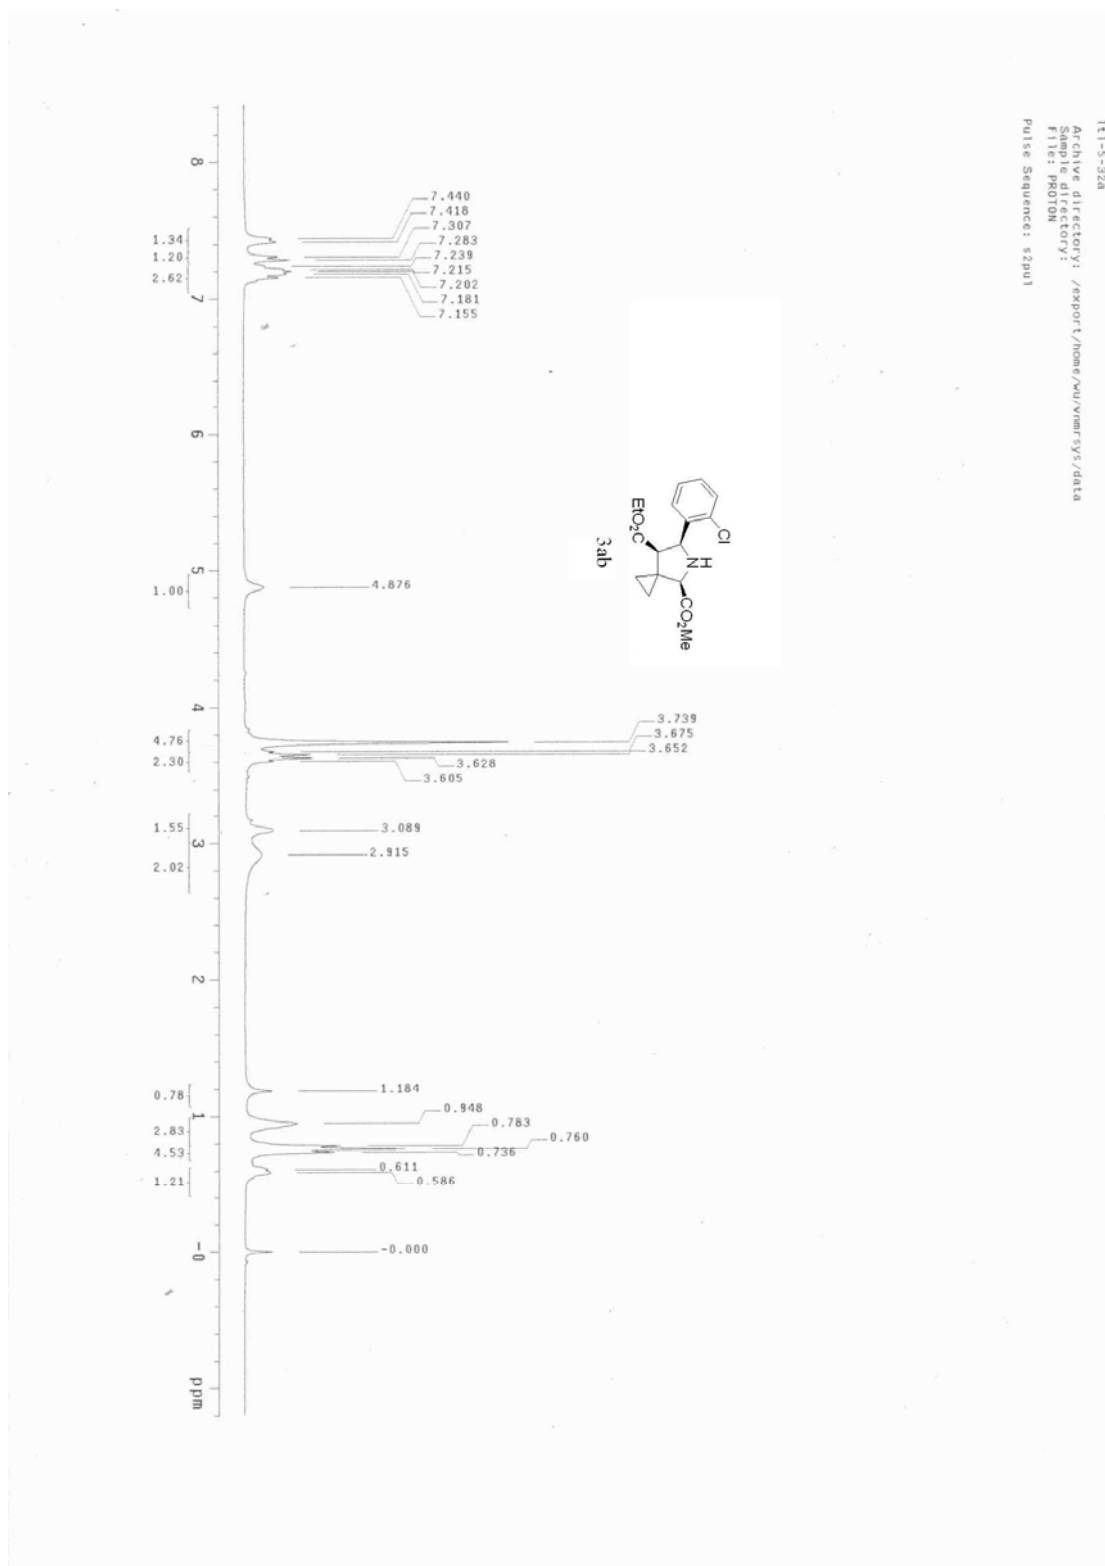

Solvent: CDCl<sub>3</sub>  
Ambient temperature  
File: C13-111-9-3A  
Mercury-300BB "mercury300"  
Pulse: delay 1.000 sec  
Pulse: 28.0 deg  
Acq. time 0.500 sec  
Width 18181.8 Hz  
RG 655.511  
SFO 125.130 MHz  
AQ 0.10000000  
DECOUPLE H1, 300.0821962 MHz  
Power 40 db  
continuously on  
MULTI ZONE ACQUA  
DATA ACQUISITION  
Line Broadening 4.0 Hz  
FT size 32768  
Total time 1 hr, 27 min, 39 sec

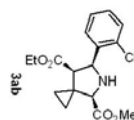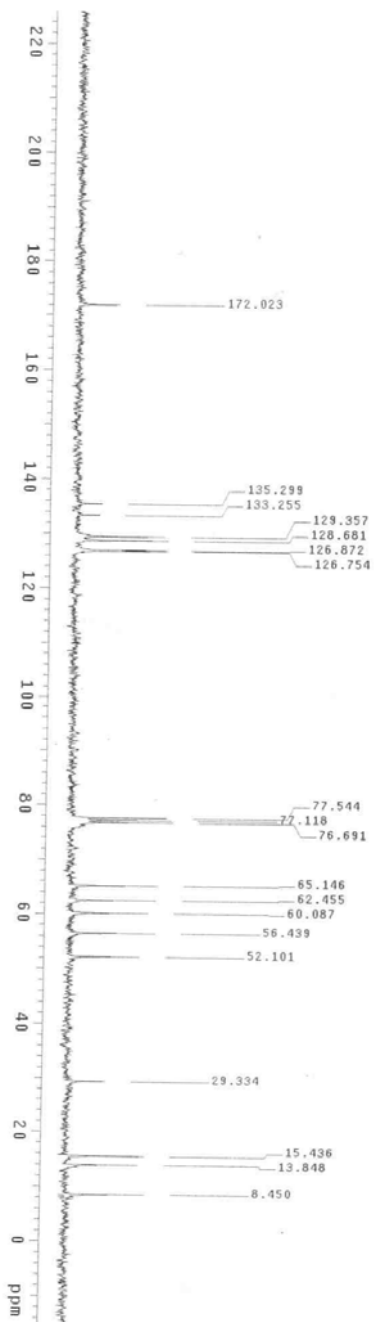

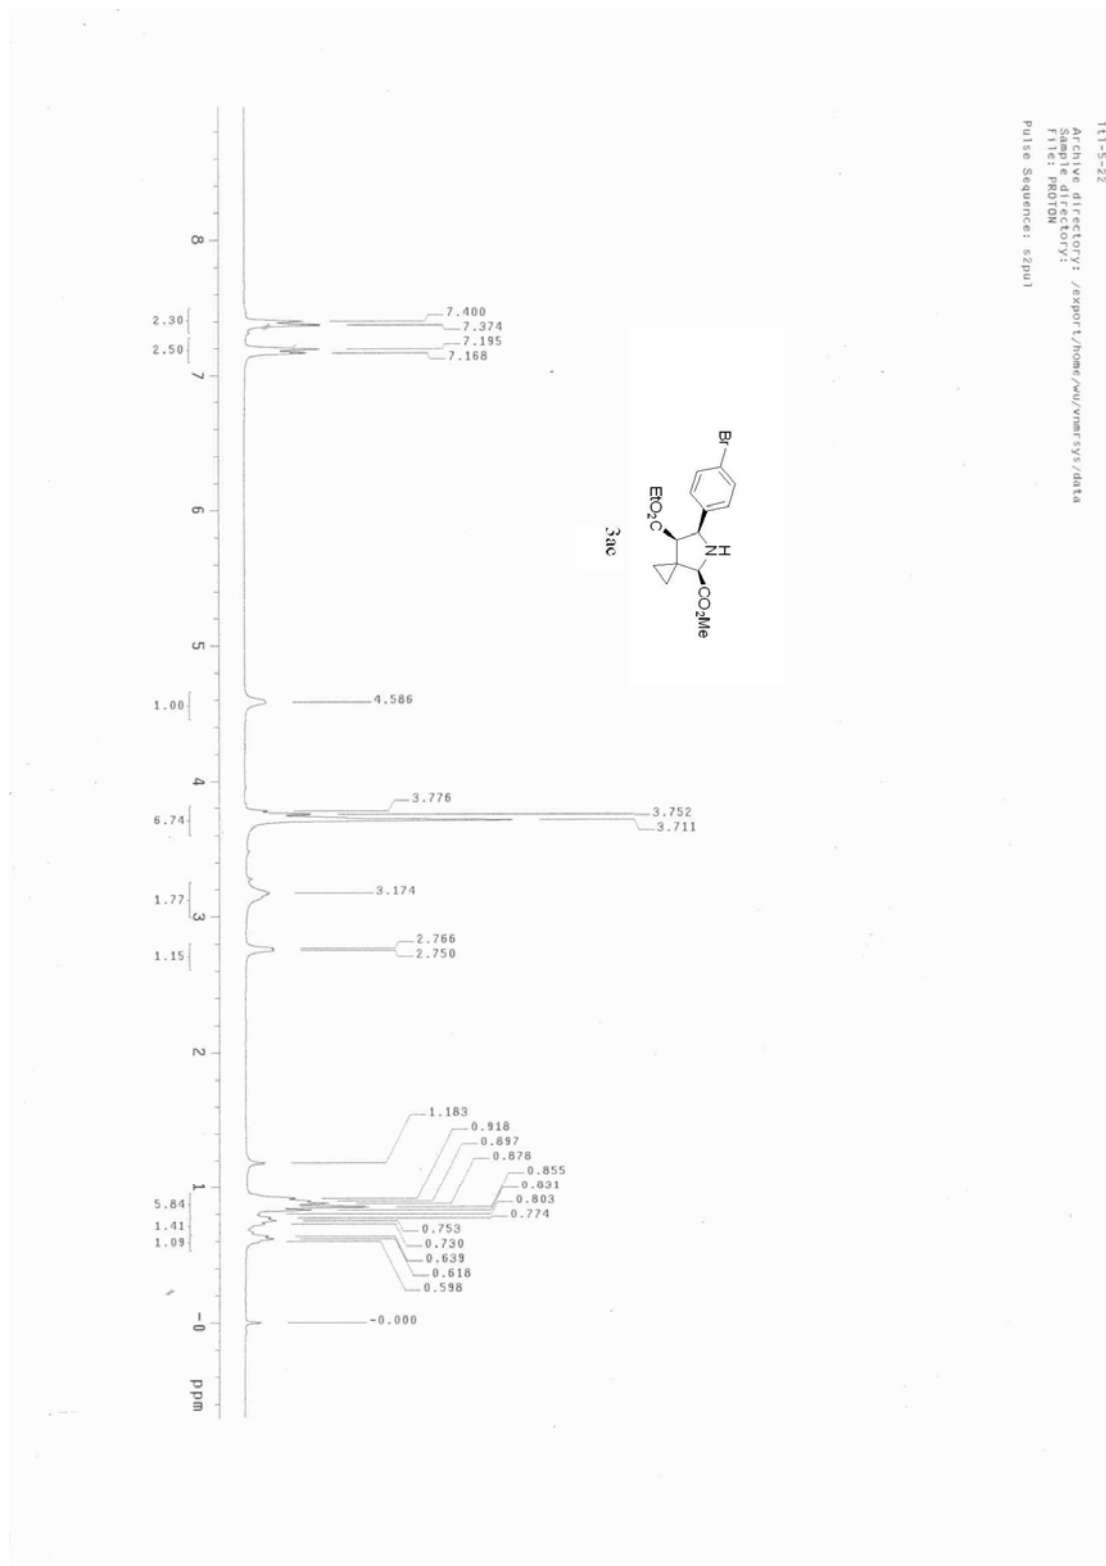

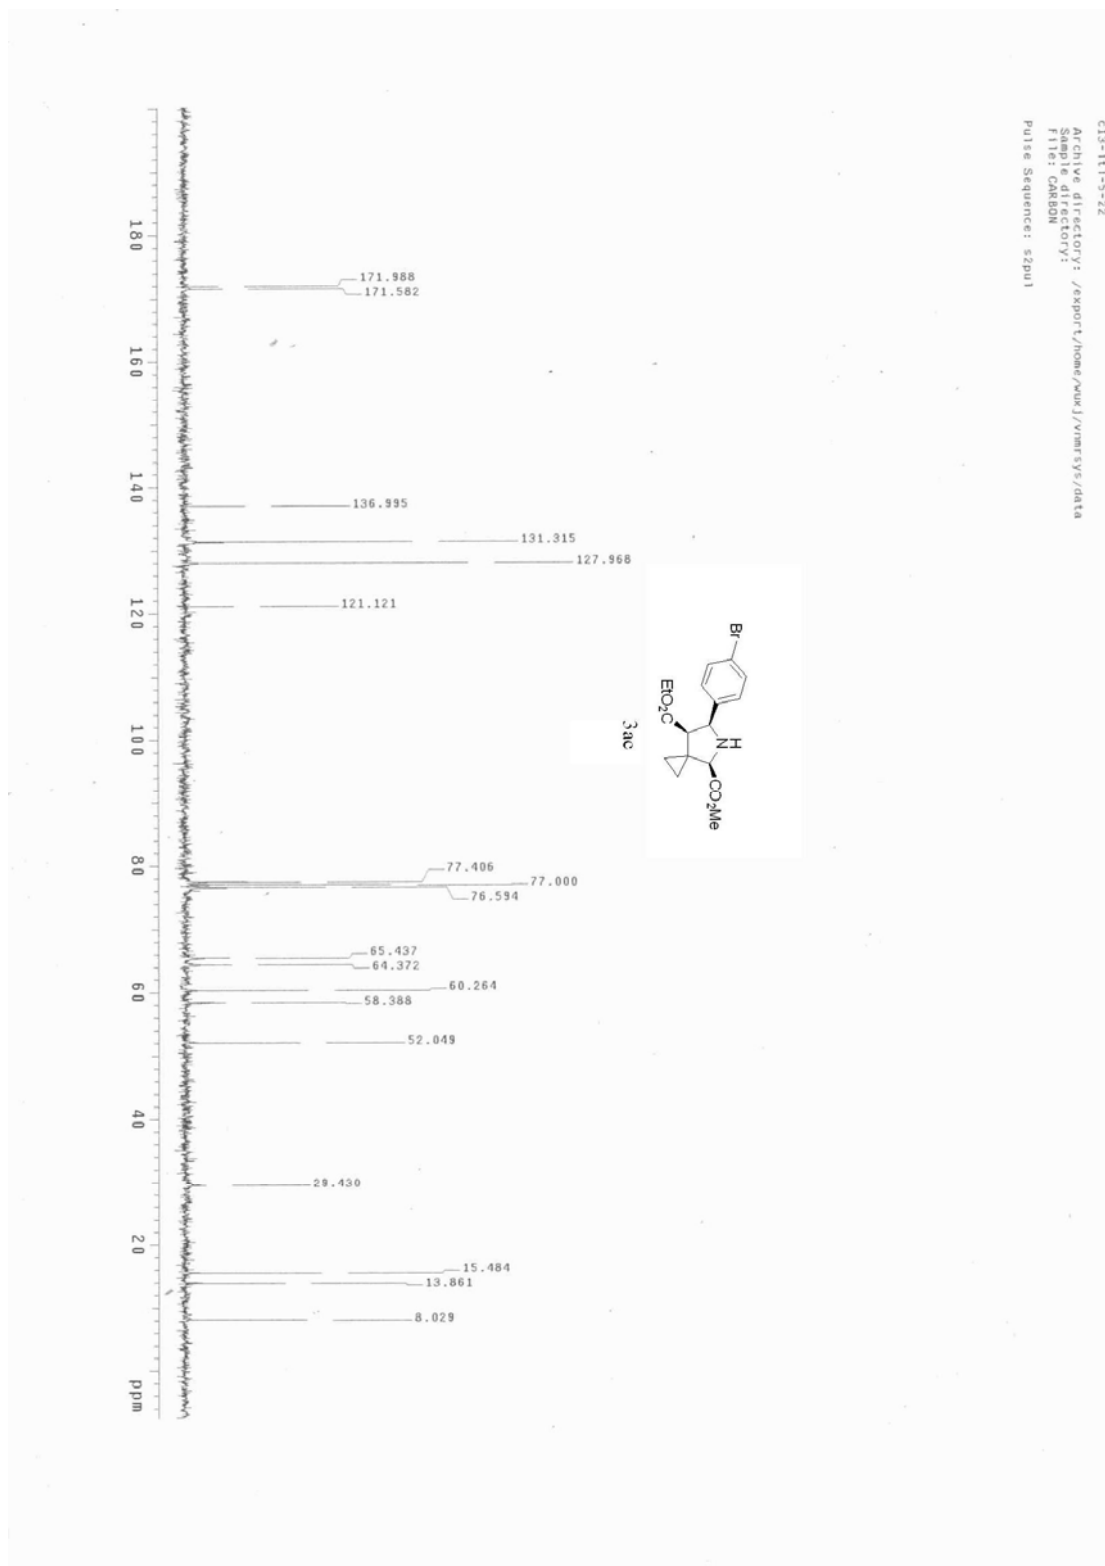

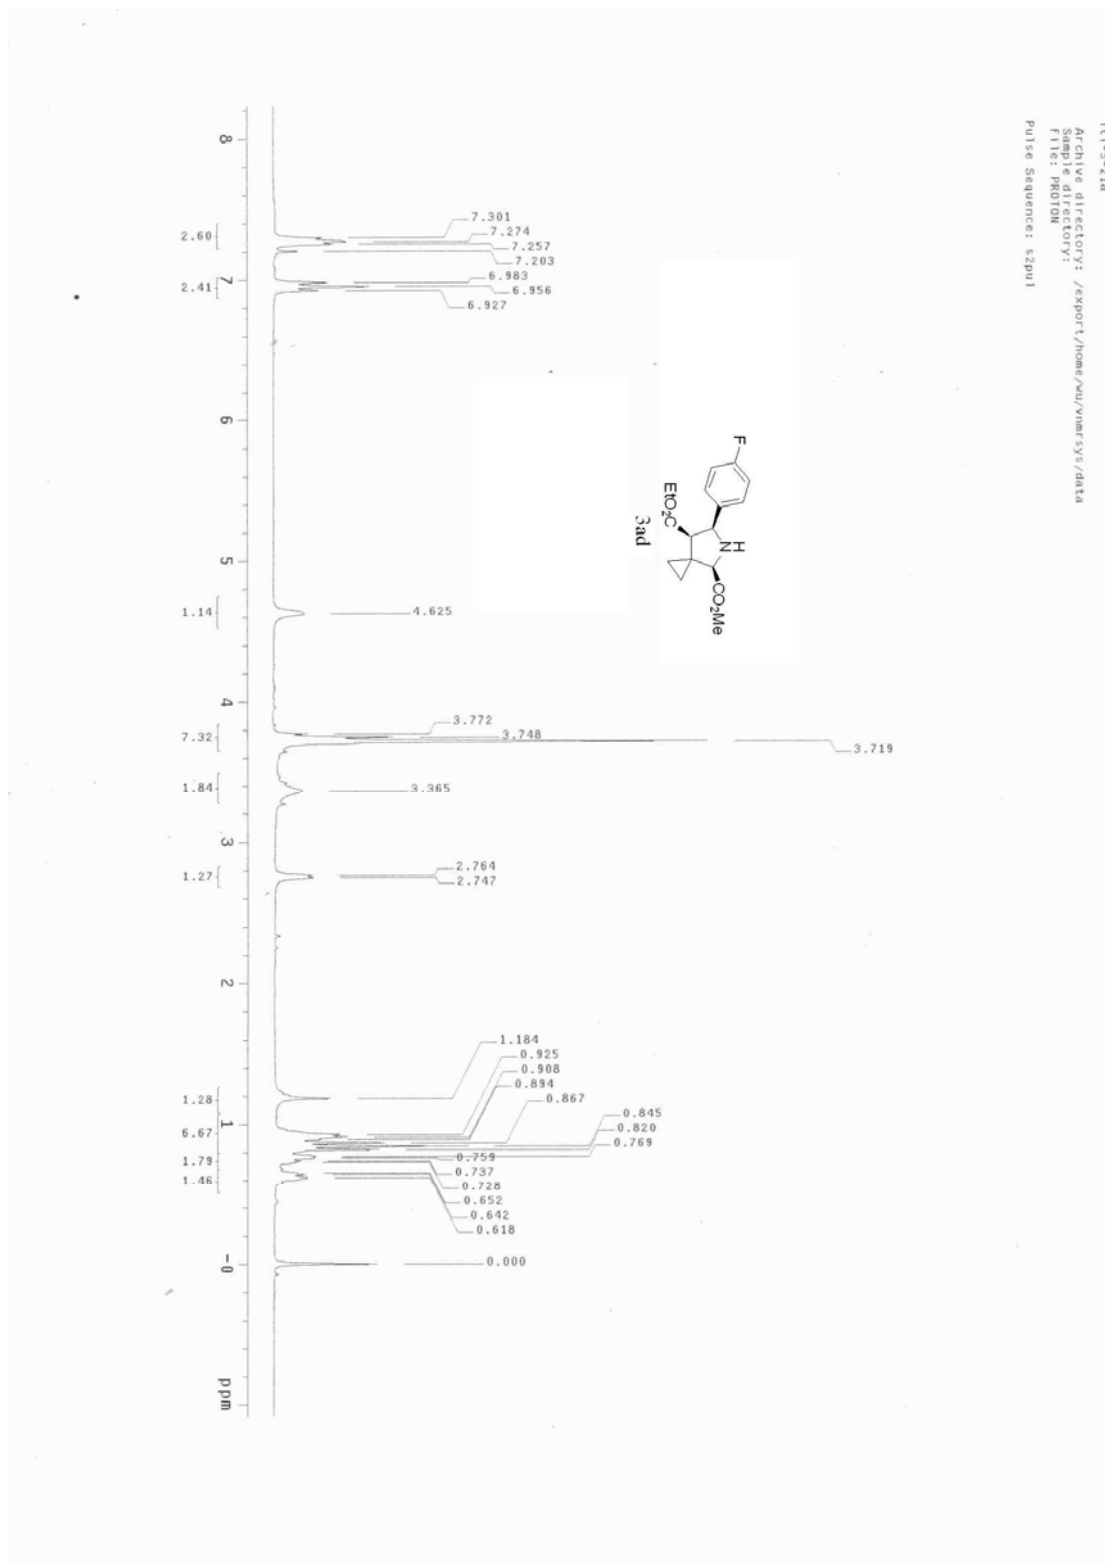



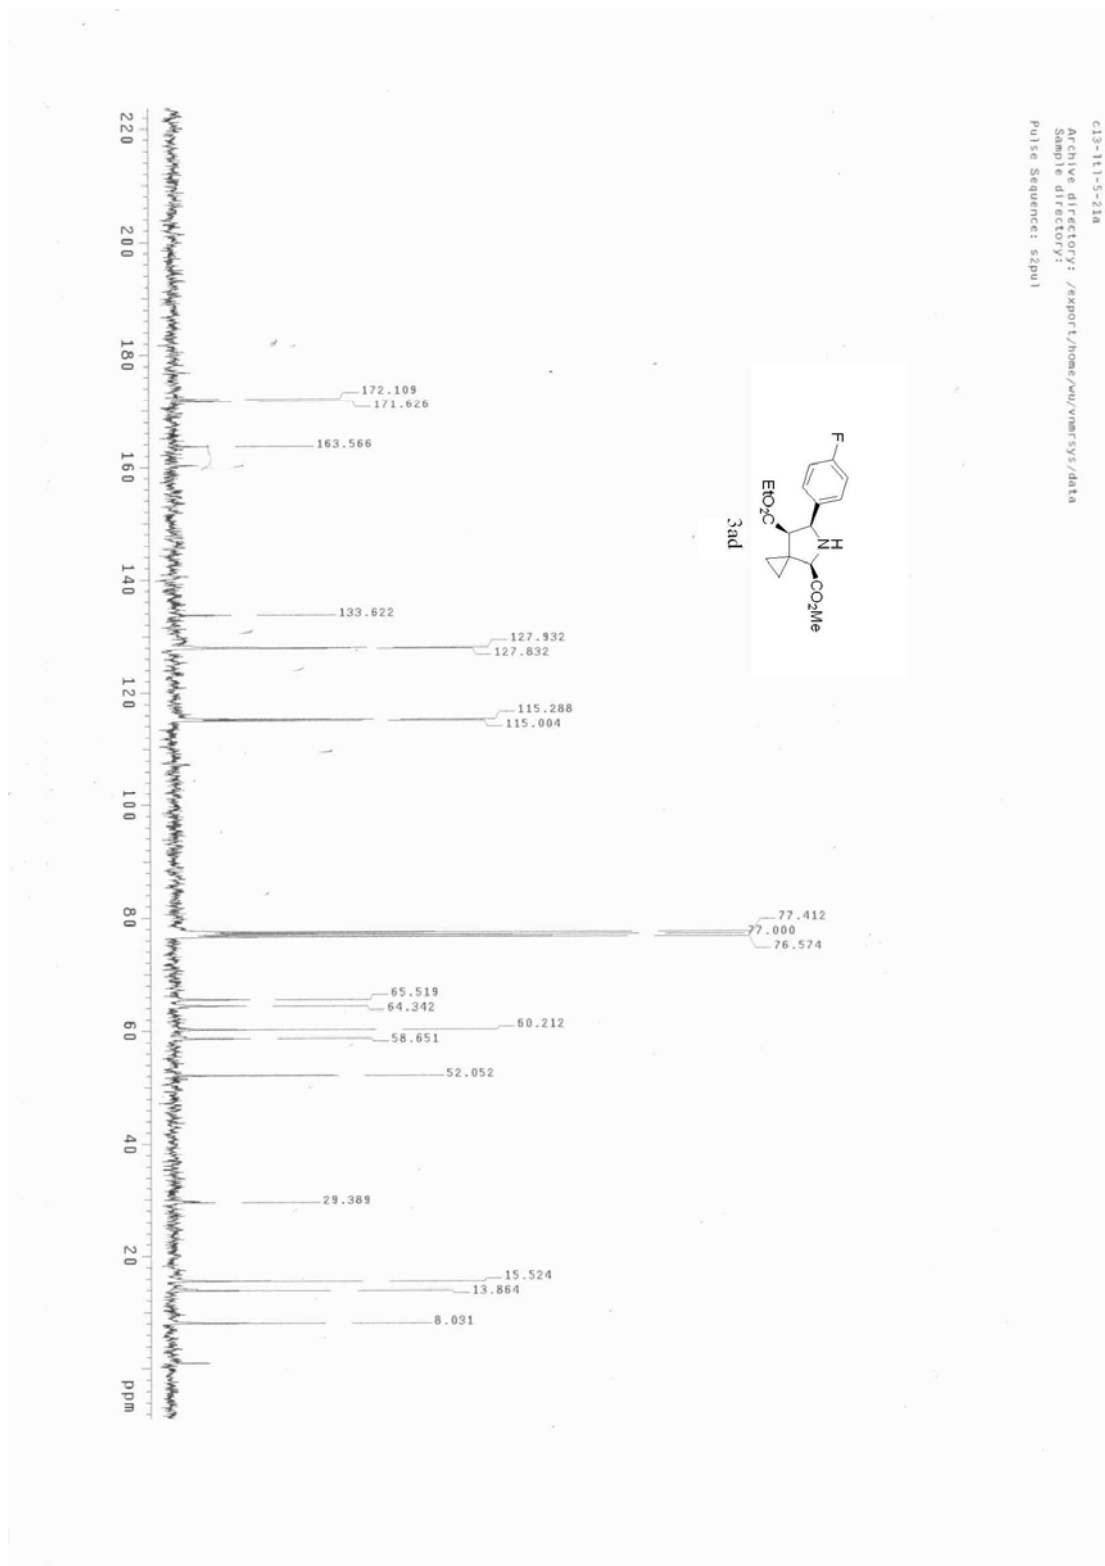

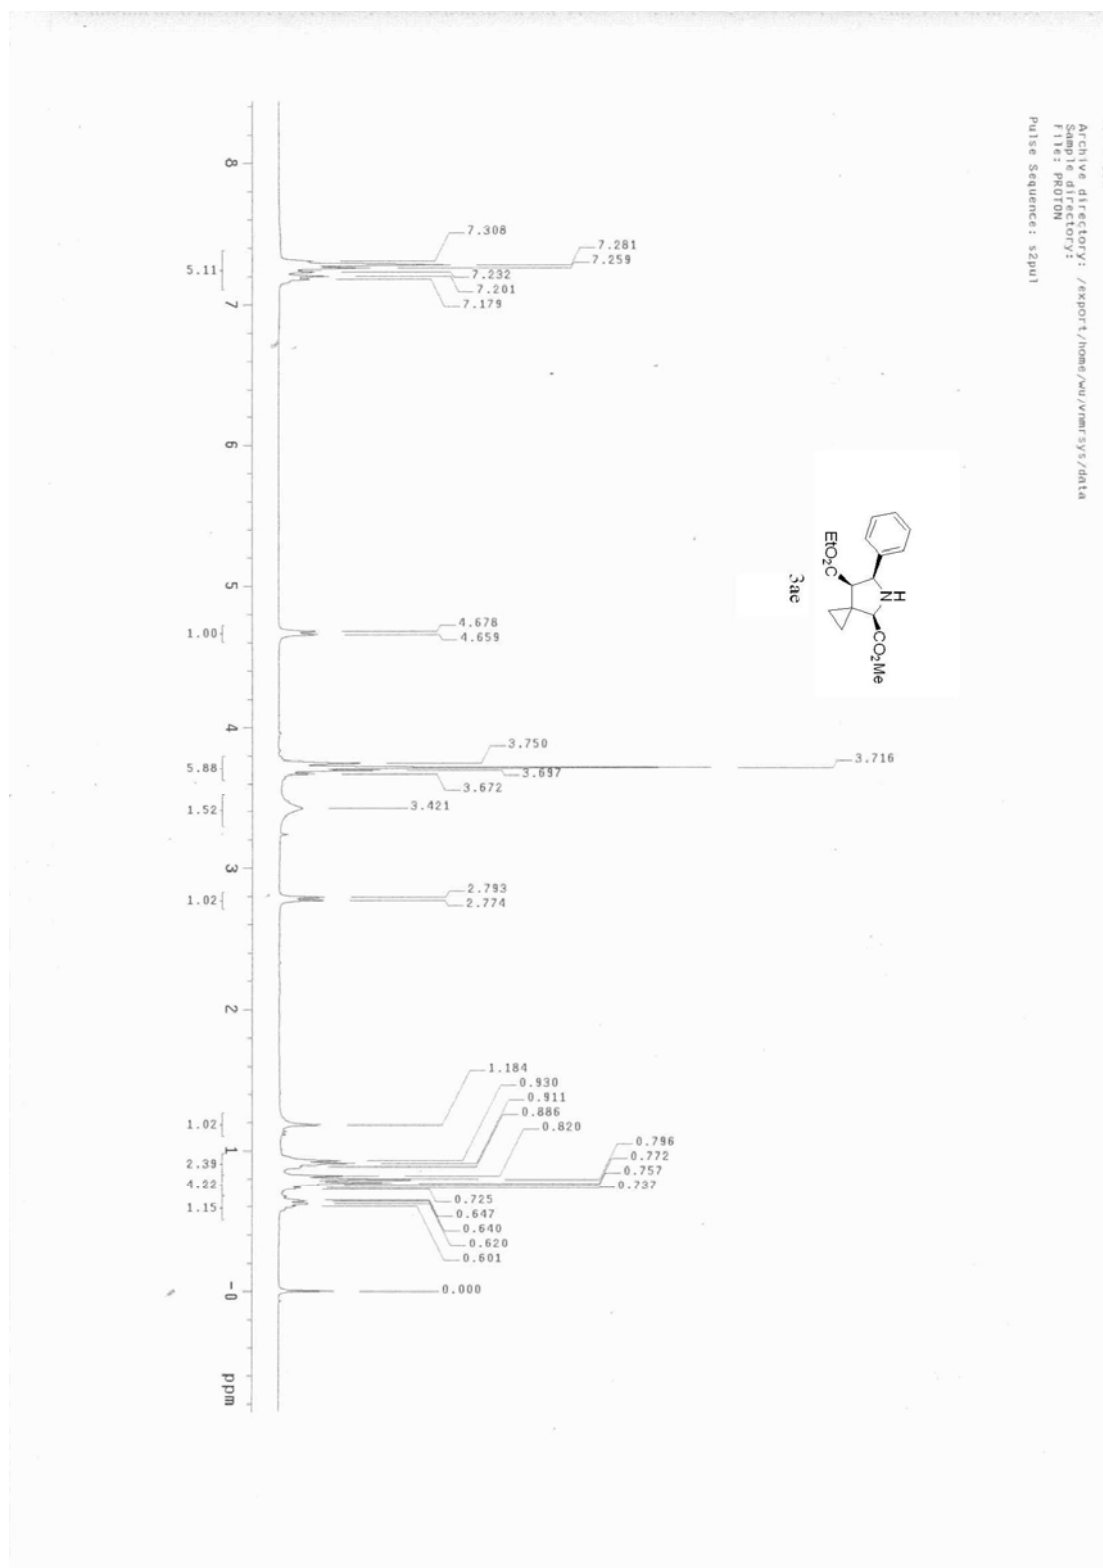

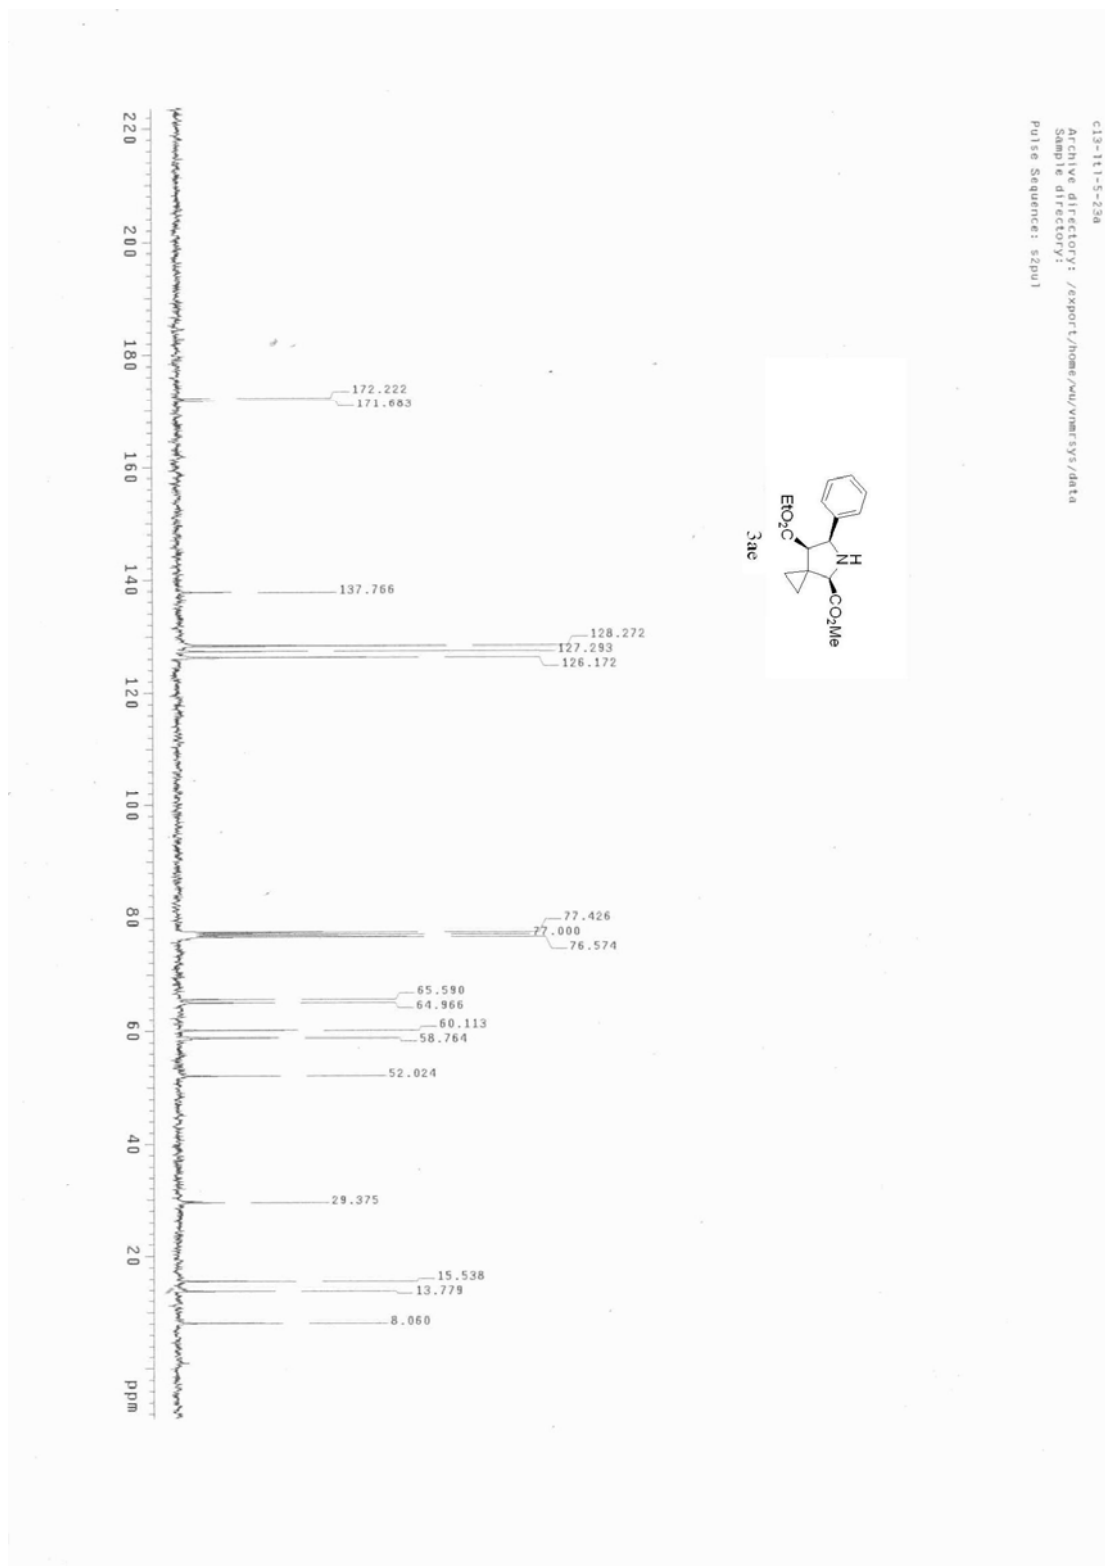

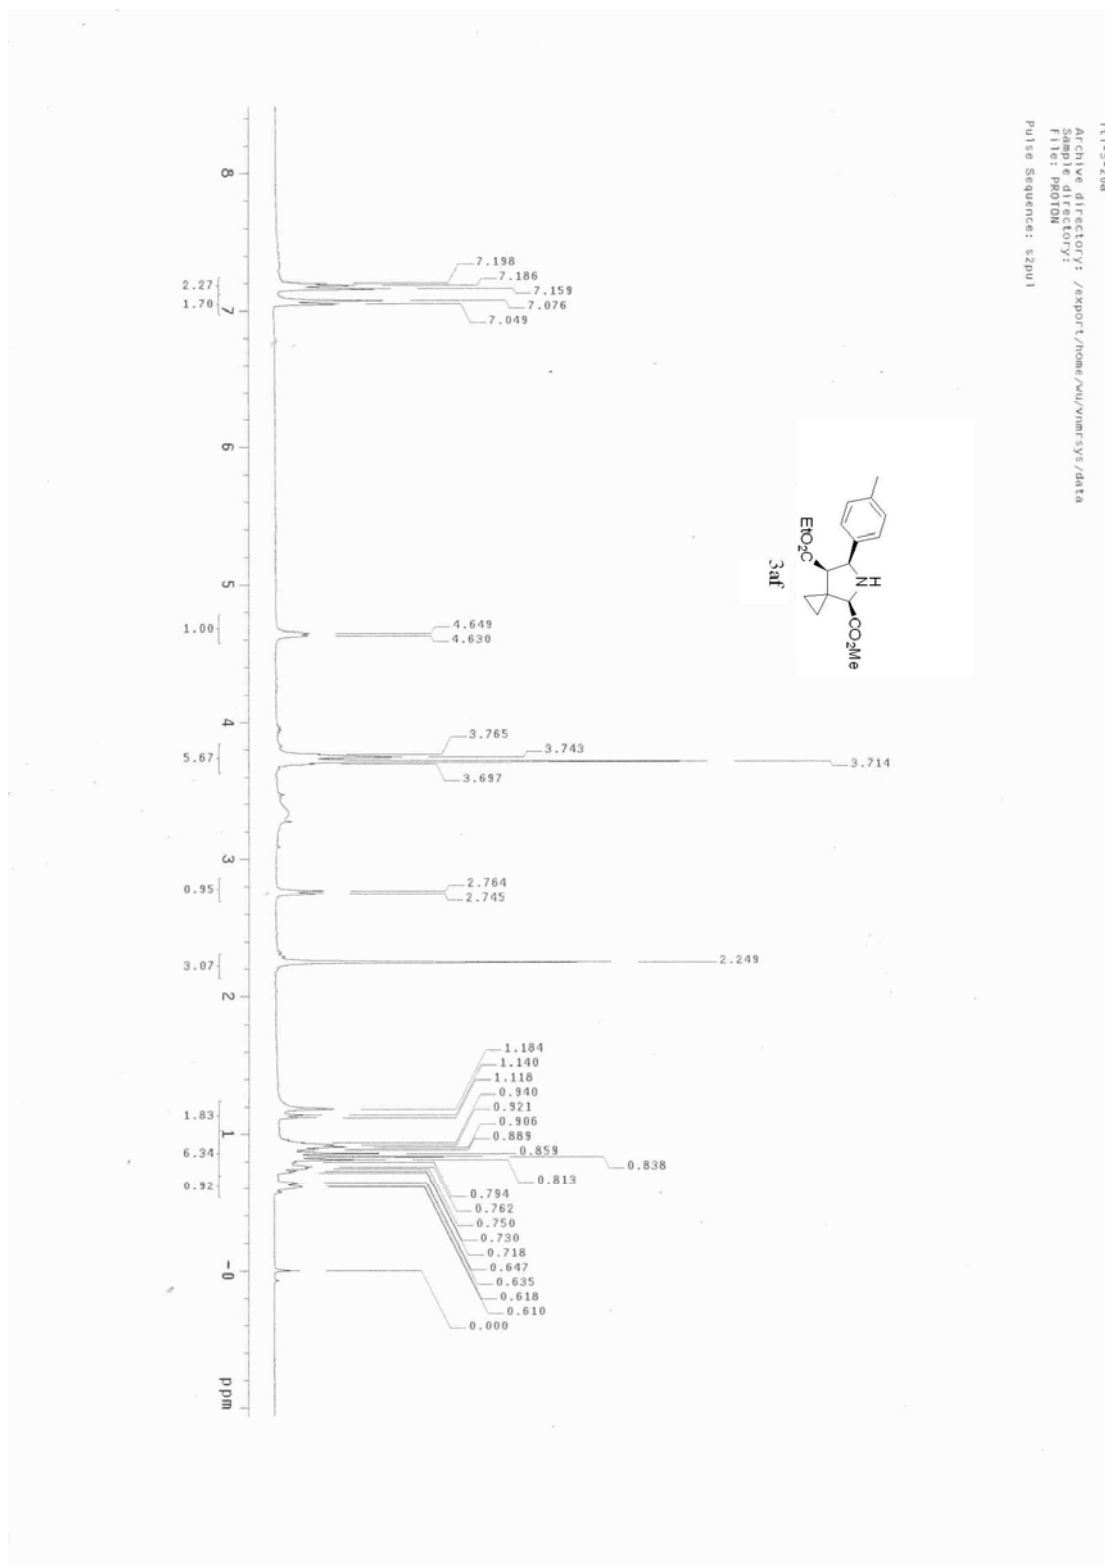

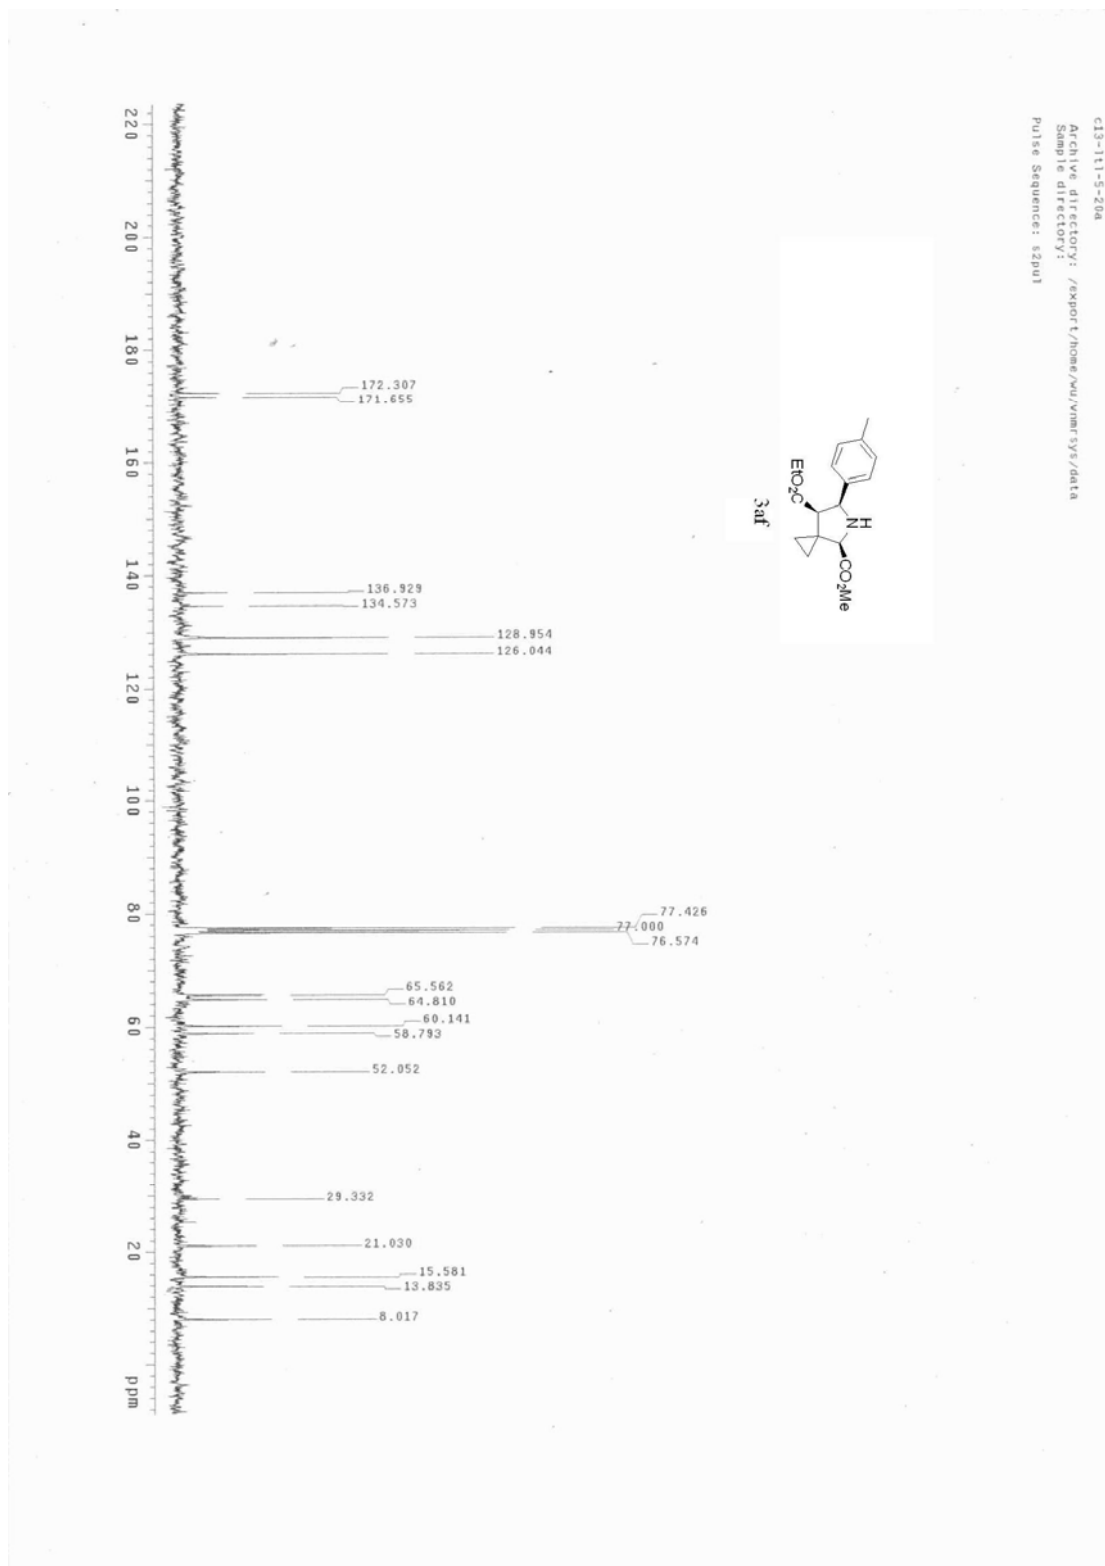

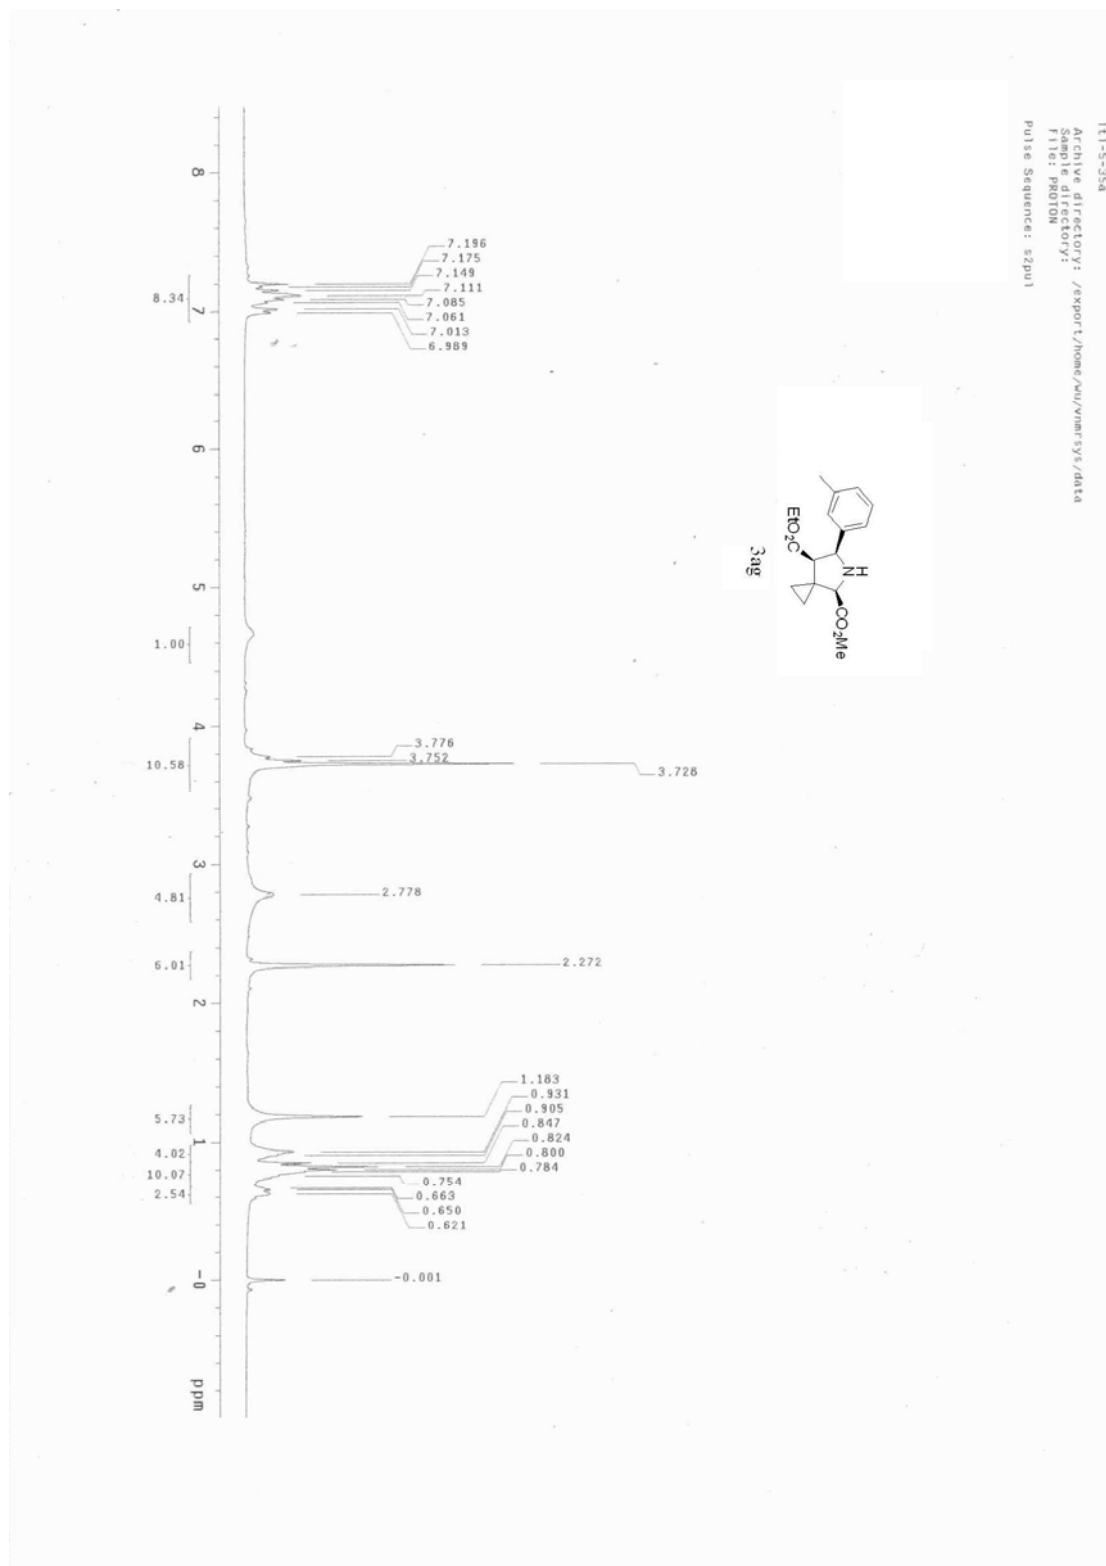

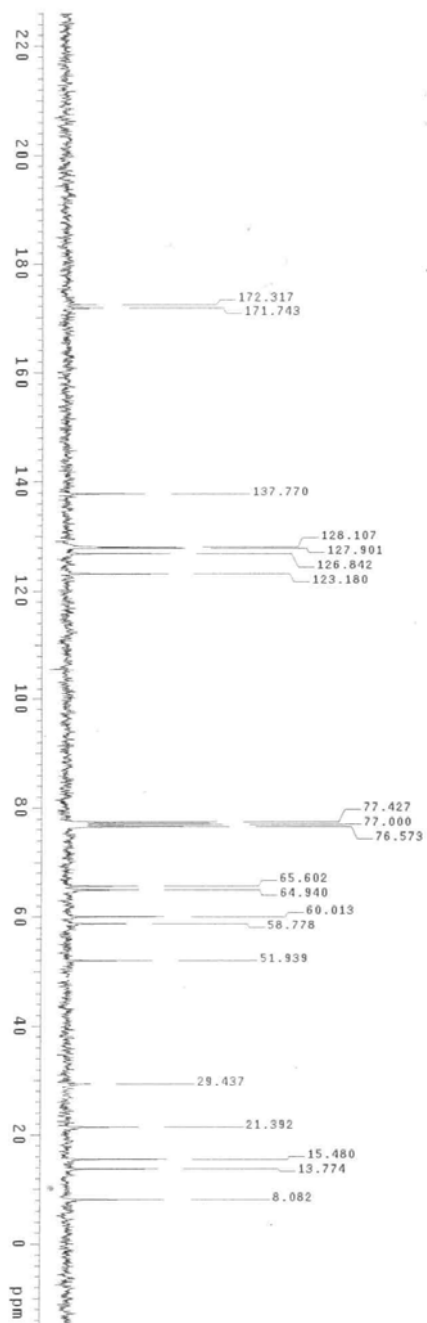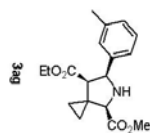

Solvent: CDCl3  
Ambient temperature  
Mercury-300SB "mercury300"  
Relax. delay 1.000 sec  
Pulse 29.0 degrees  
Acq. time 1.000 sec  
Width 1818.8 Hz  
120 repetitions  
OBSERVE C13, 75.4552461 MHz  
DECOUPLE H1, 300.0821962 MHz  
continuously on  
WALTZ-16 modulated  
DATA PROCESSING  
Line broadening 4.0 HZ  
Gamma 2.00000000  
Total time 1 hr, 27 min, 30 sec

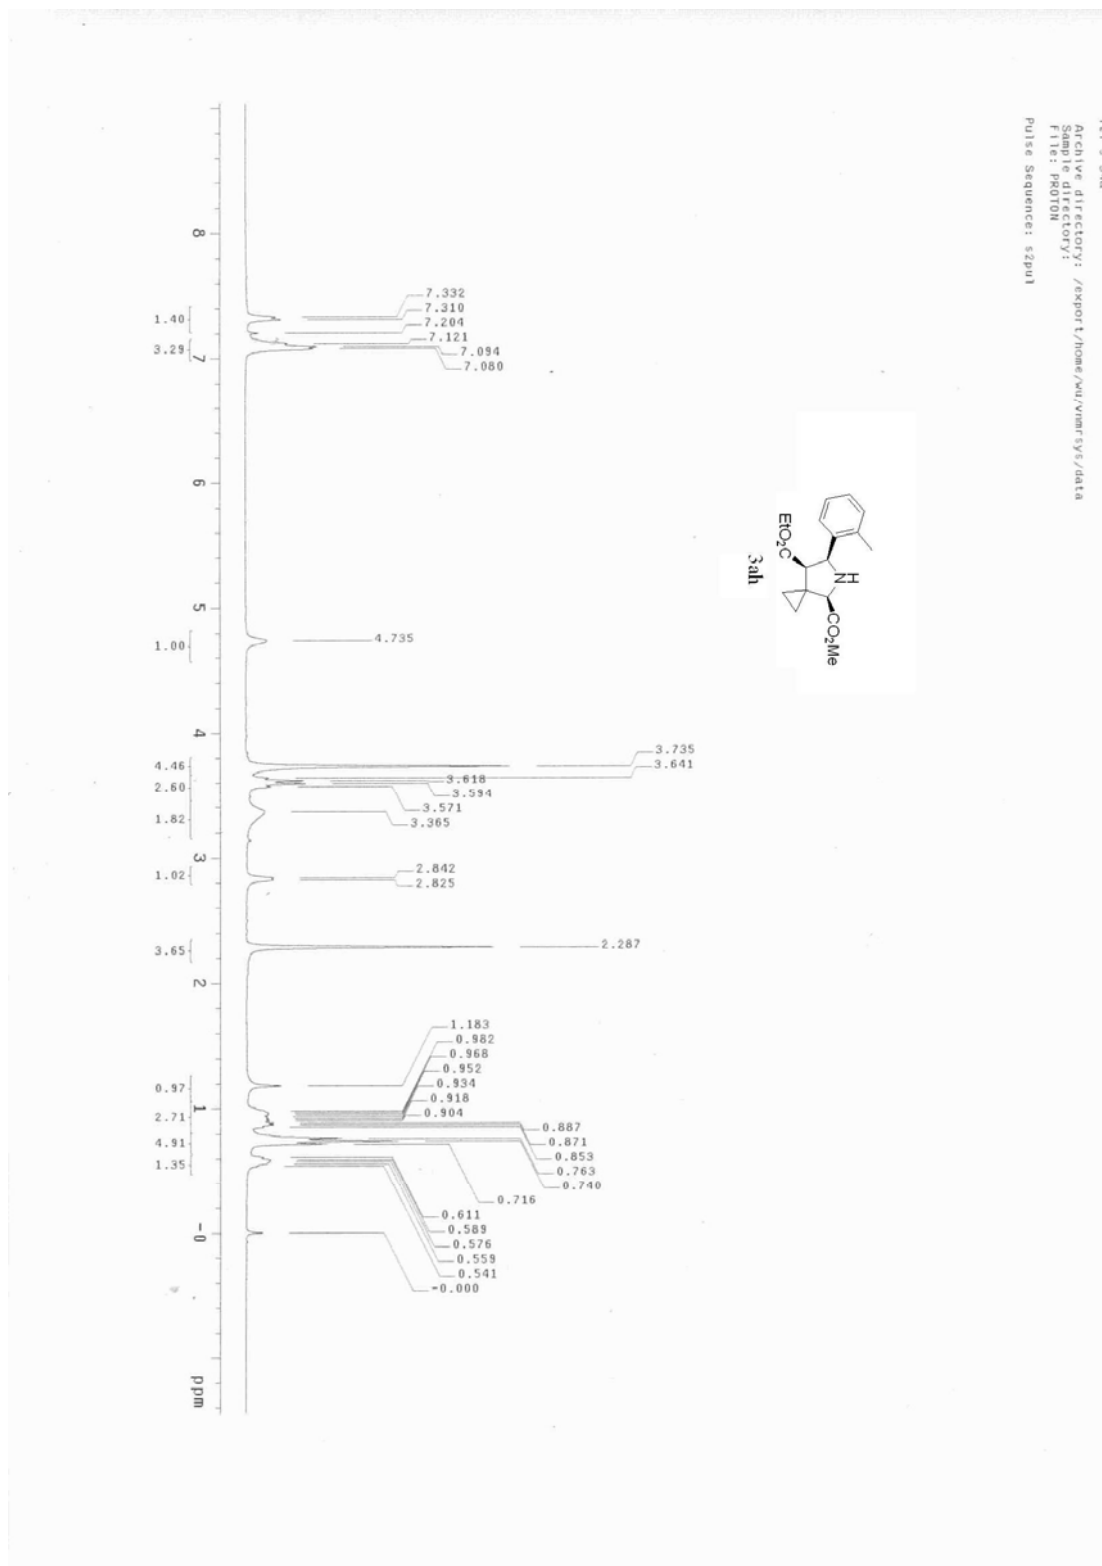



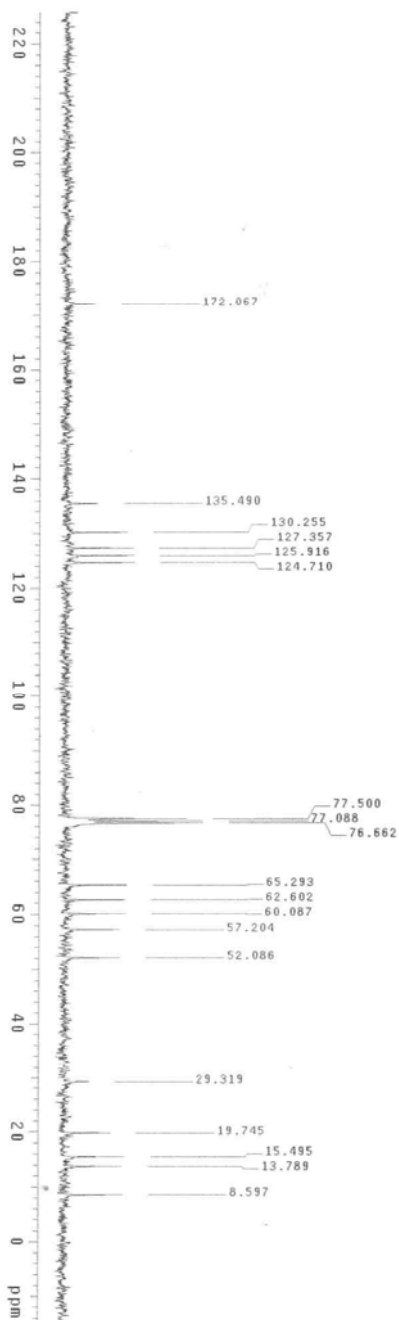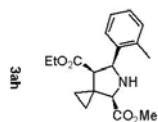

Solvent: CDCl3  
Ambient temperature  
Mercury-300BB "Mercury300"  
Relax-delay 1.000 sec  
Pulse 25.000 degrees  
Acq-time 0.500 sec  
Width 18181.8 Hz  
208 repetitions  
OBSERVE CH3 75.4552472 MHz  
PULSEPROG zgpg30  
Power 40 db  
continuously on  
WALTZ-16 modulated  
DATA PROCESSING  
F2 size 32768  
Total time 1 hr, 27 min, 39 sec

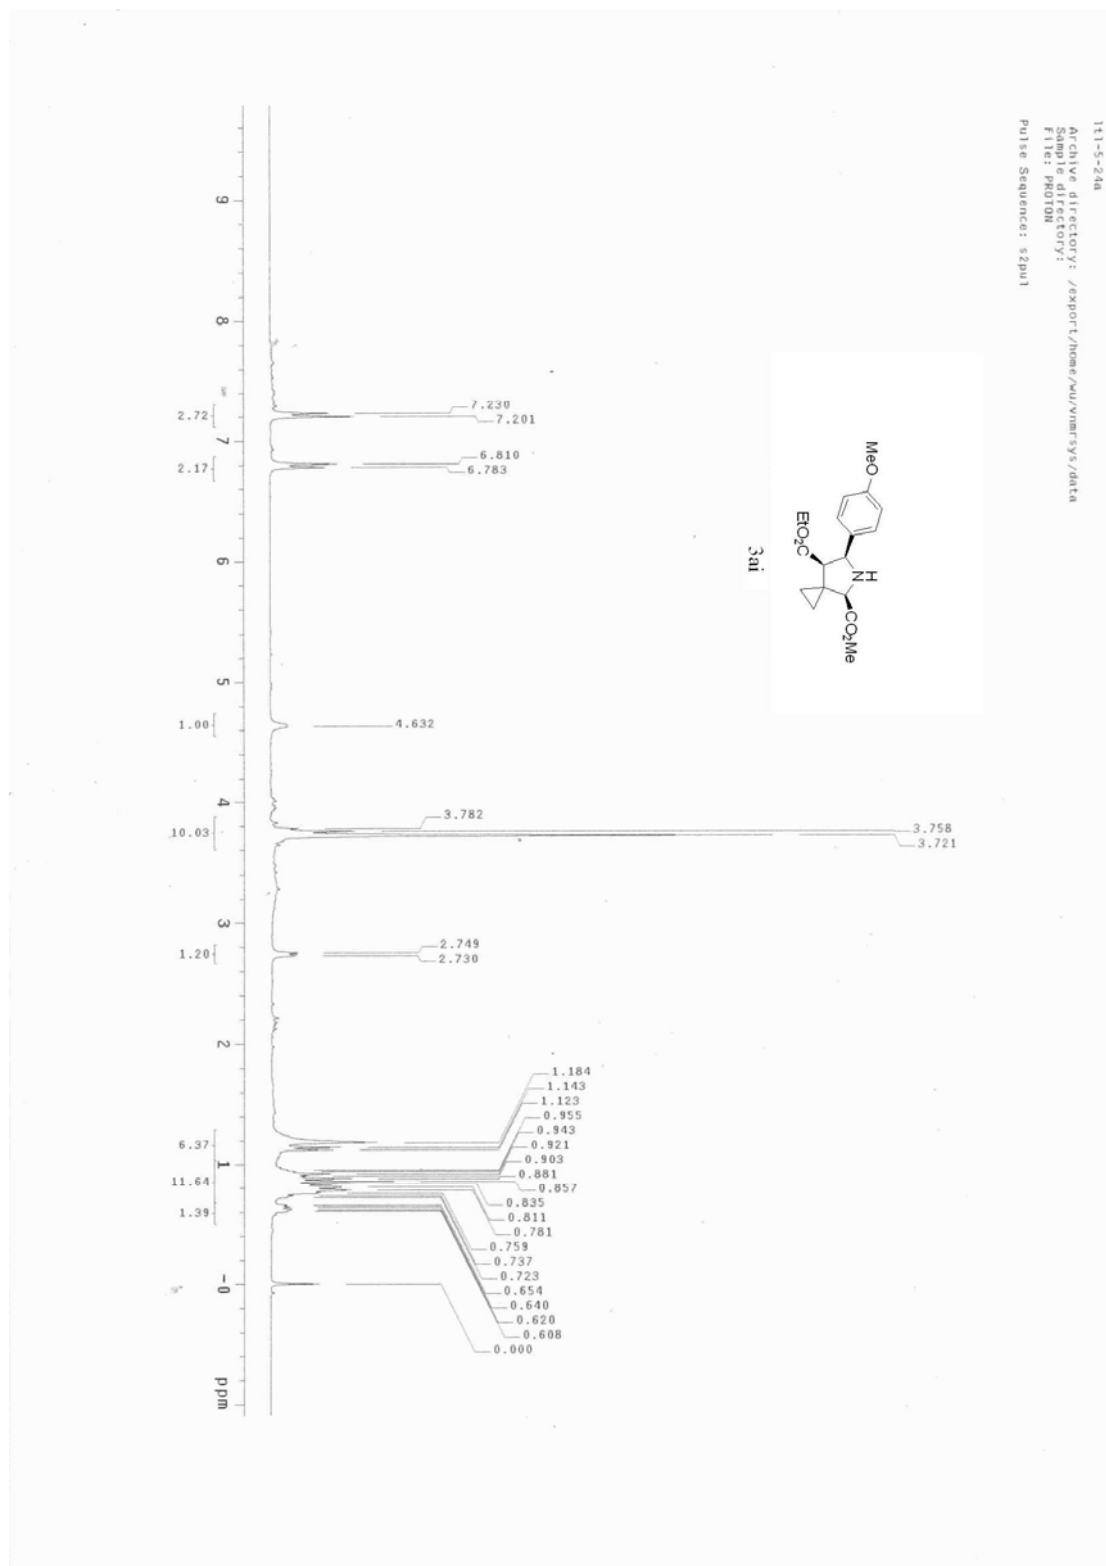

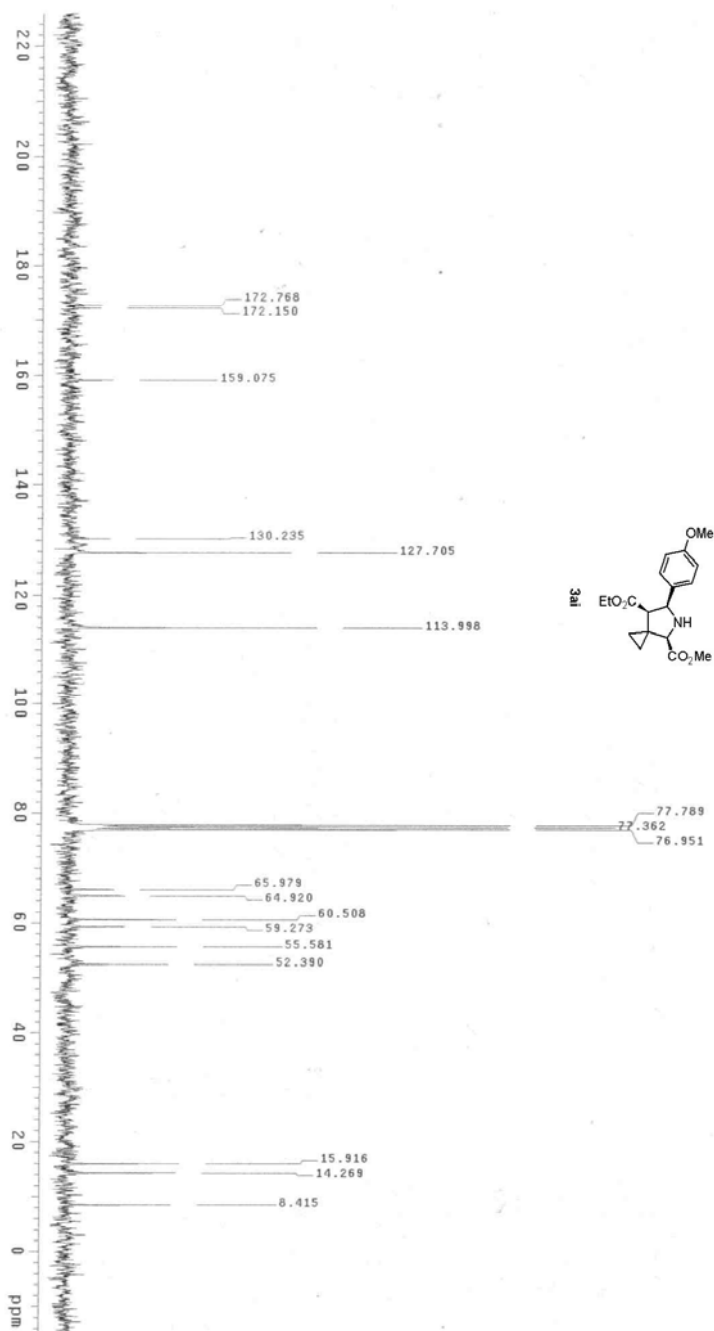

L11-8-3-0

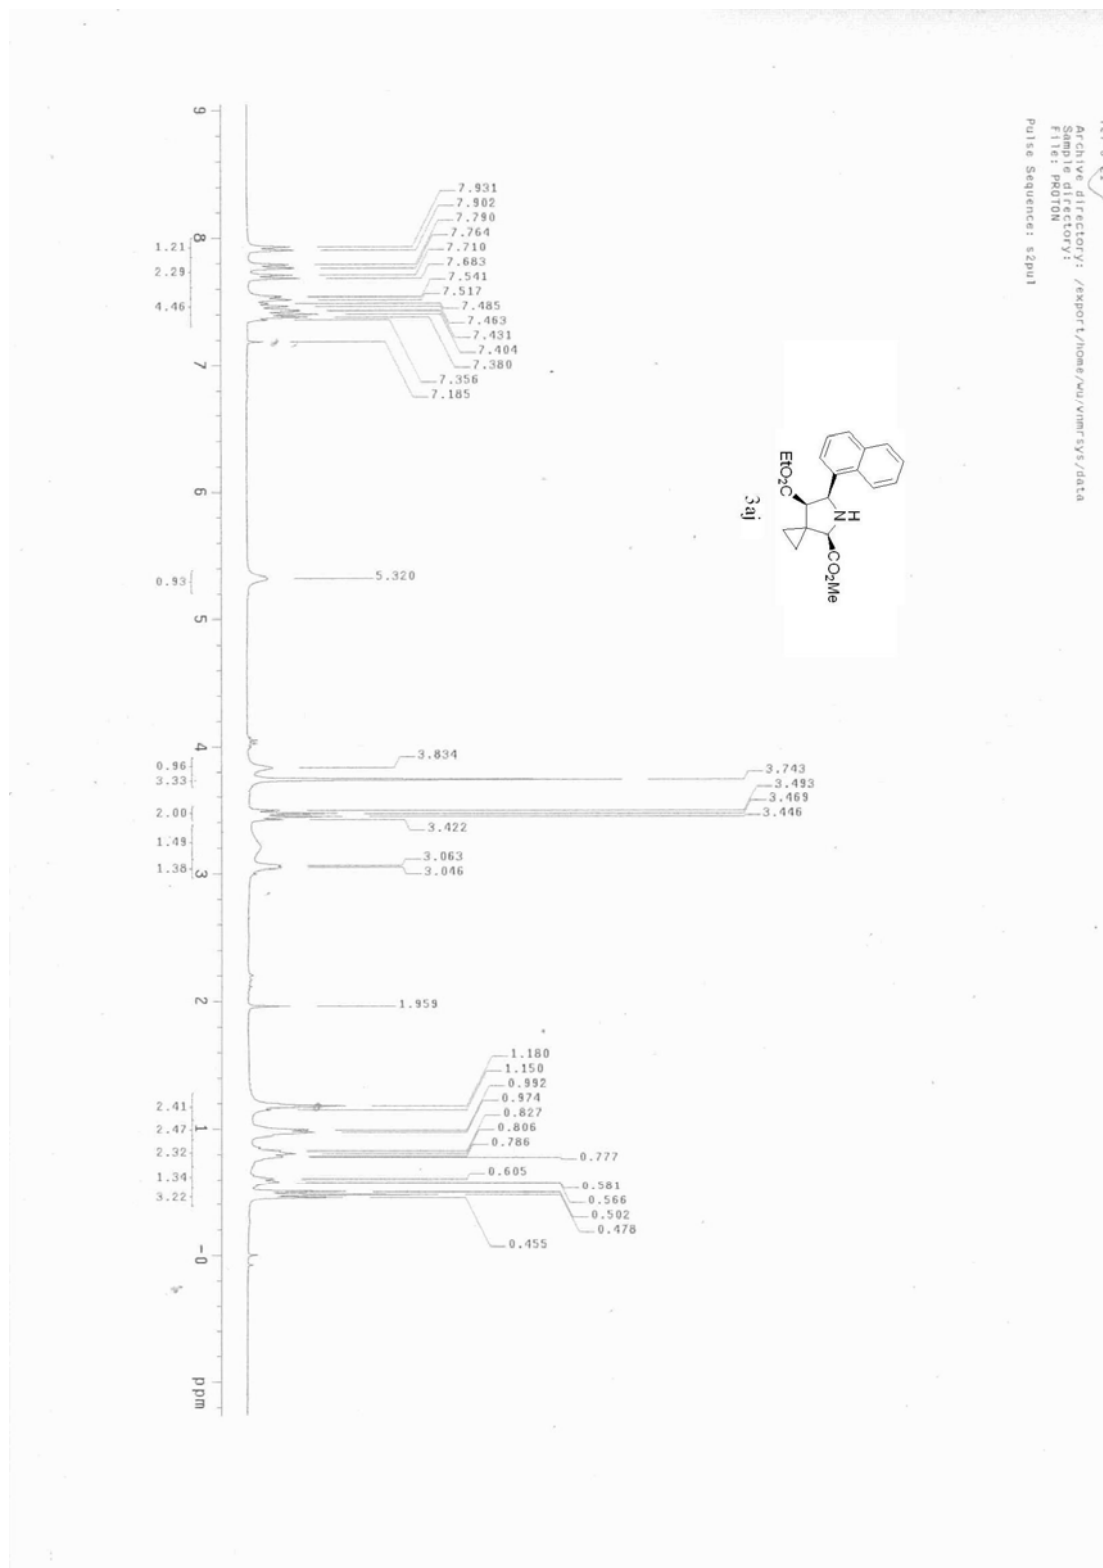

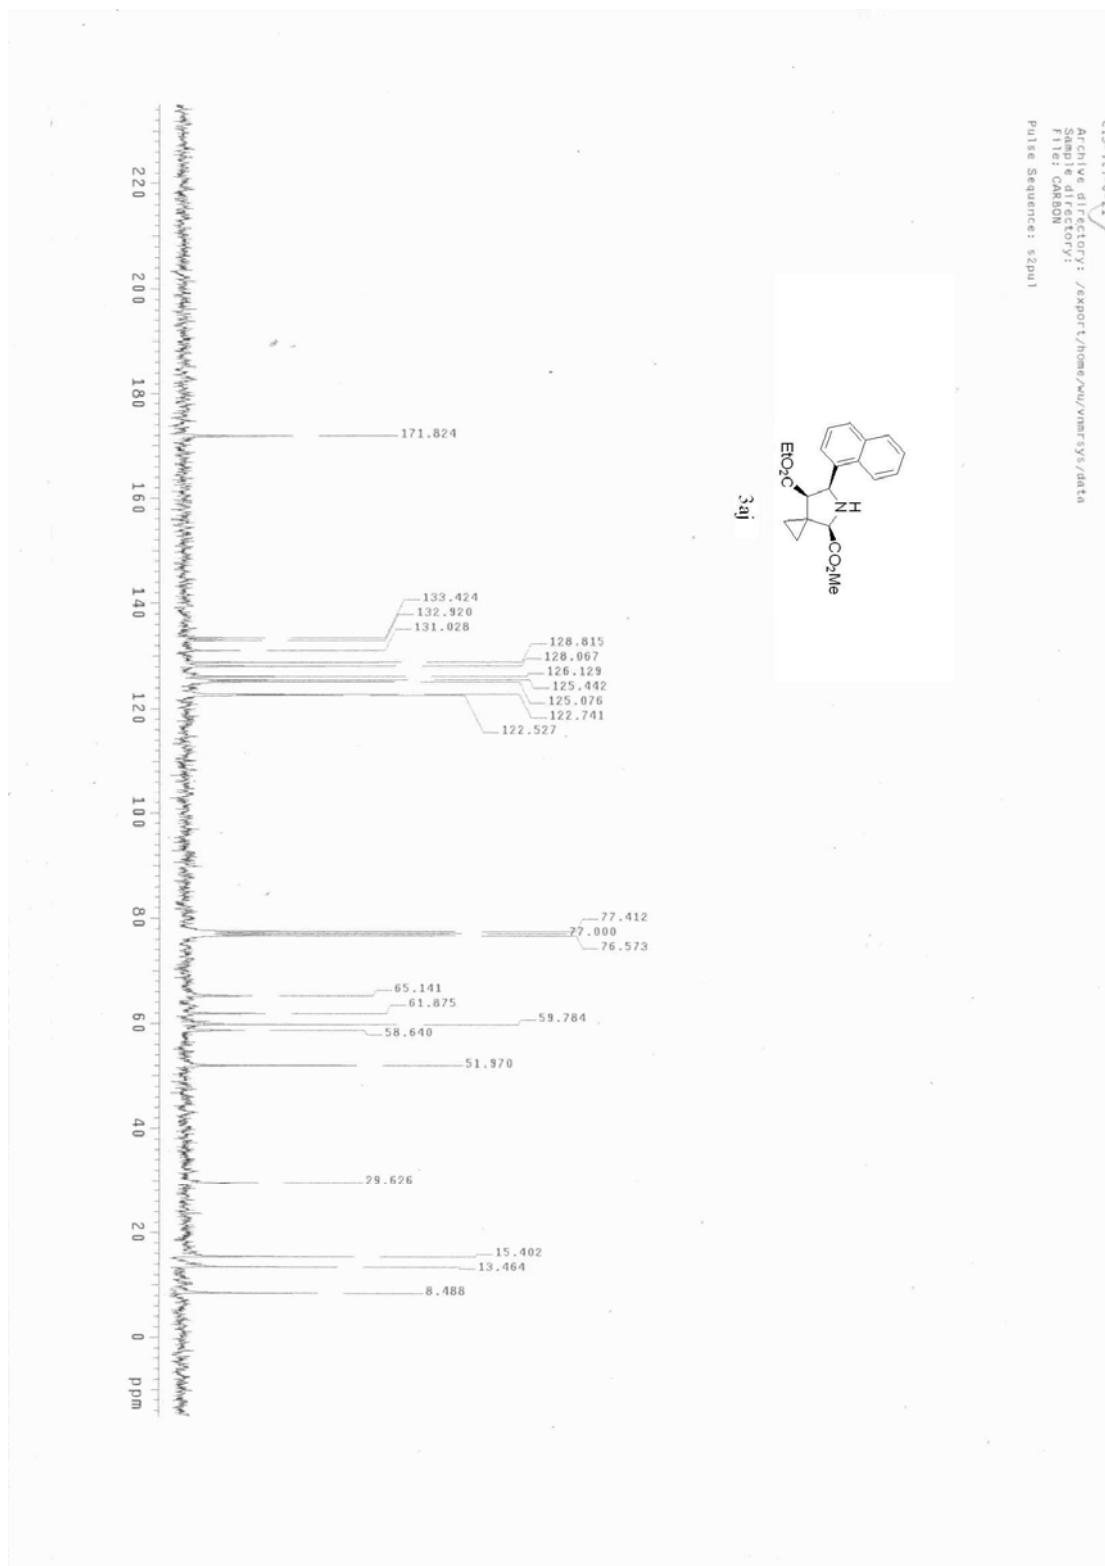

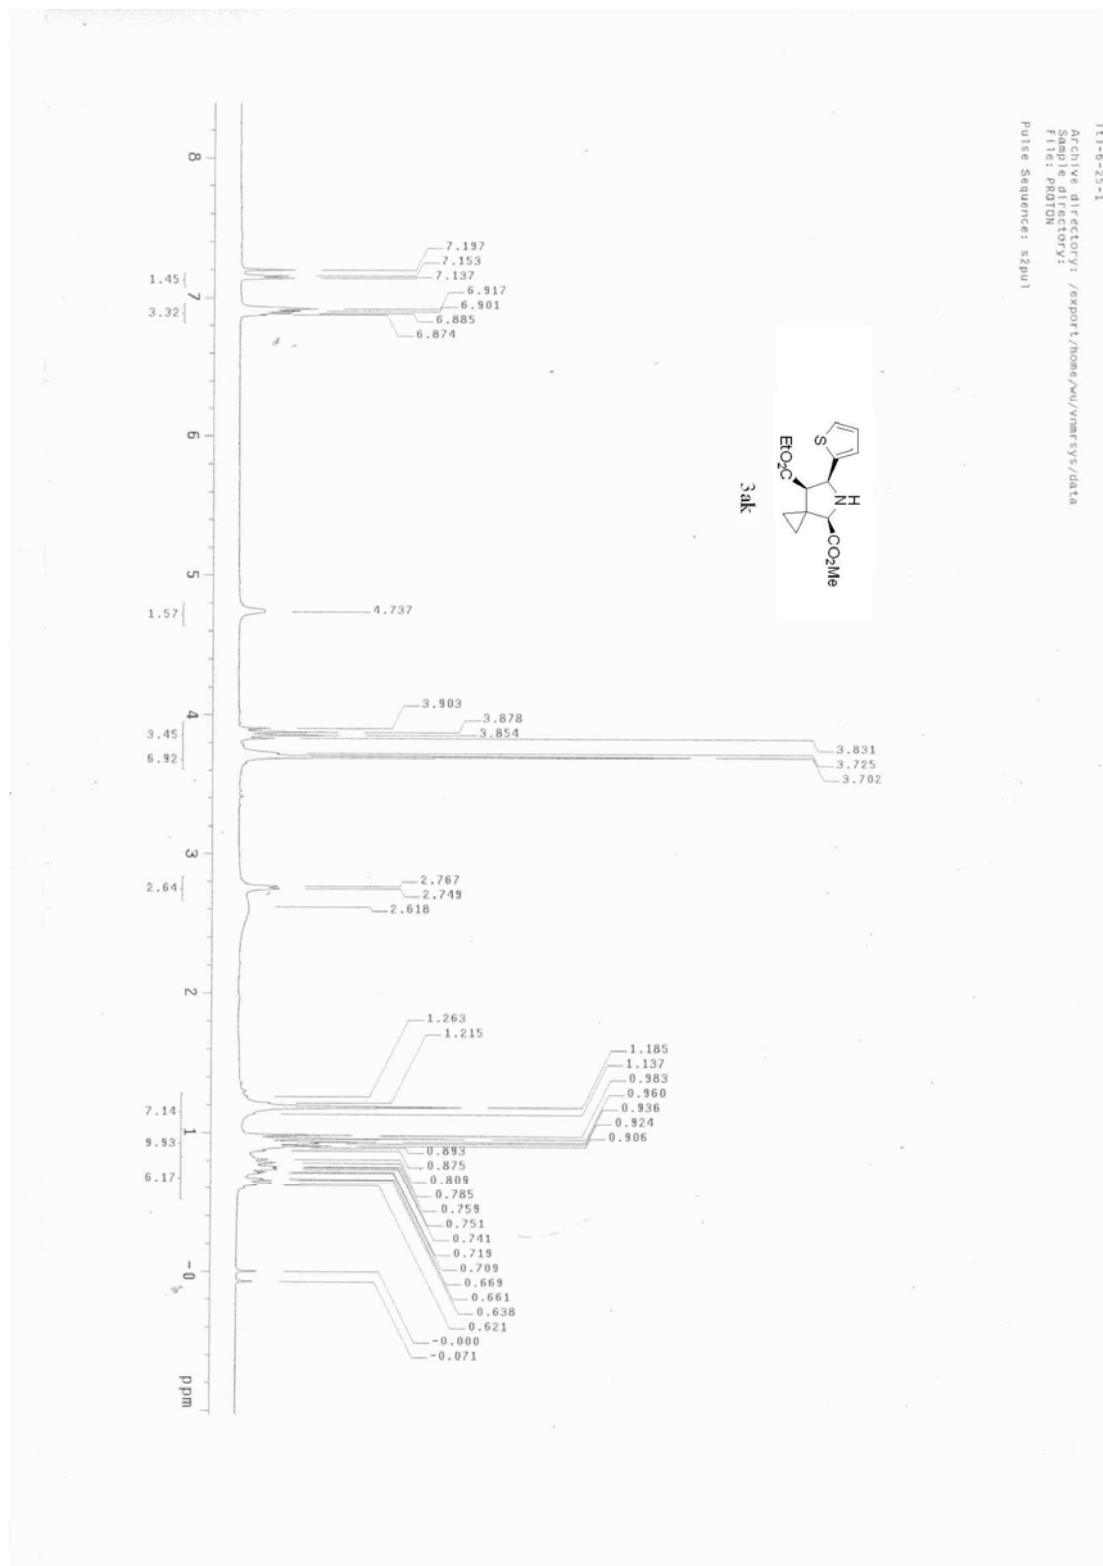

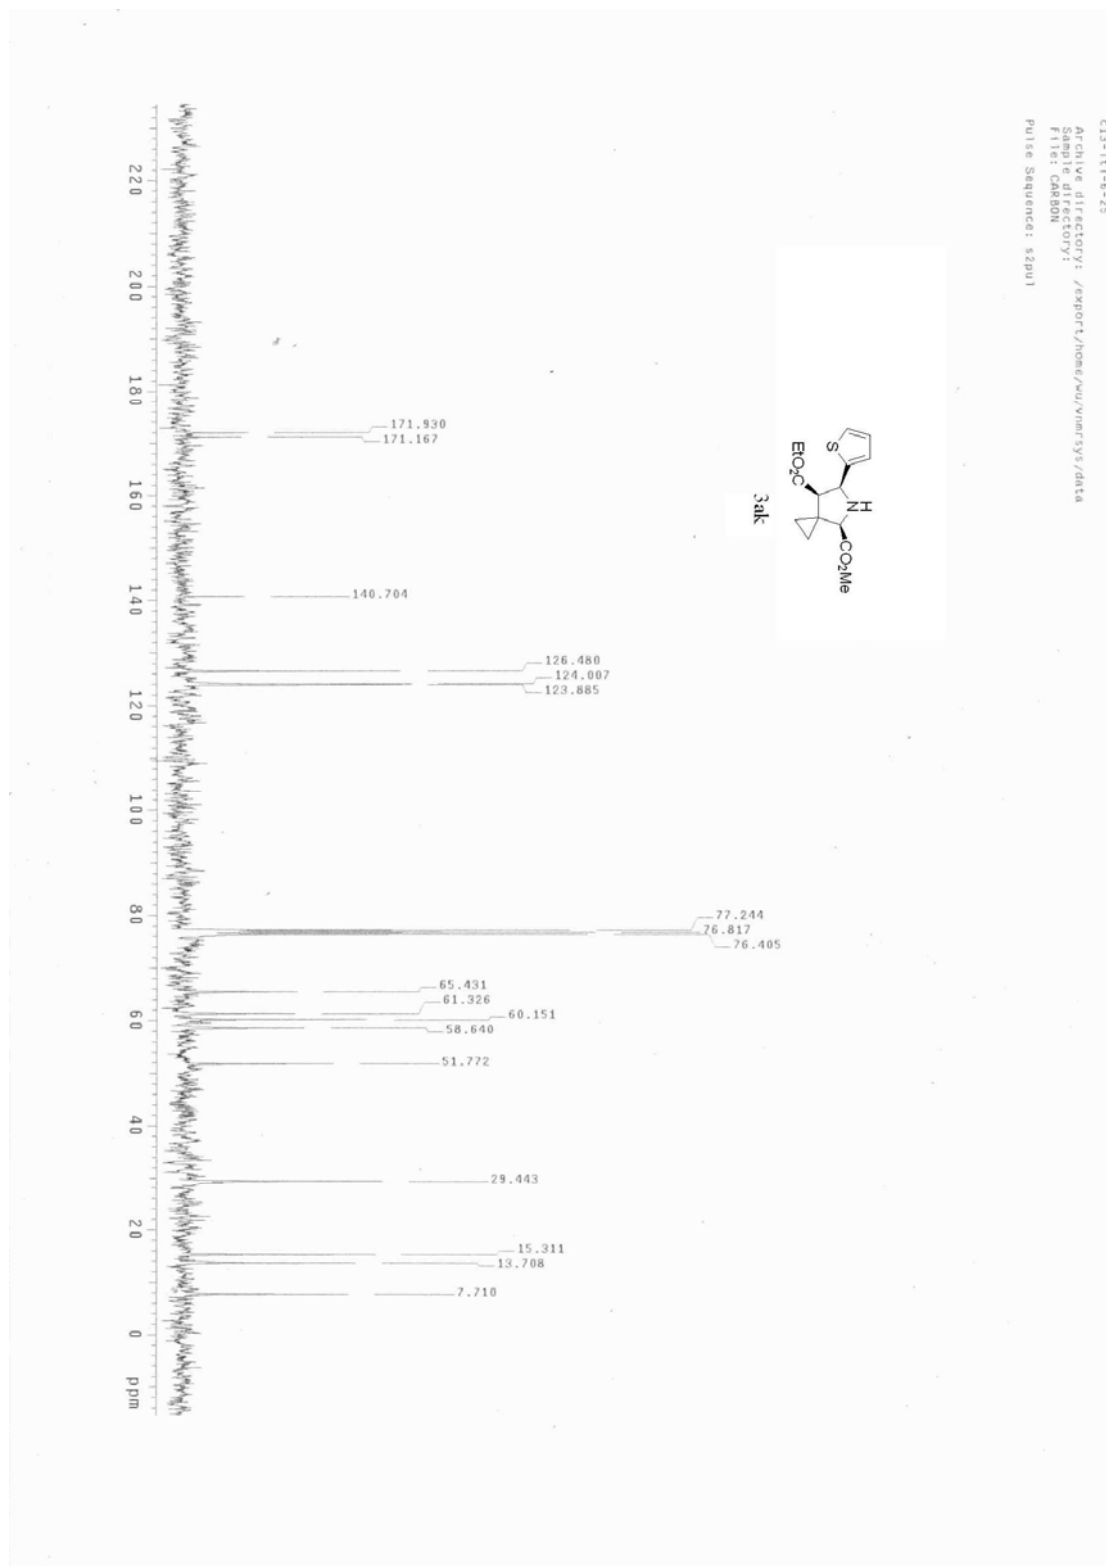

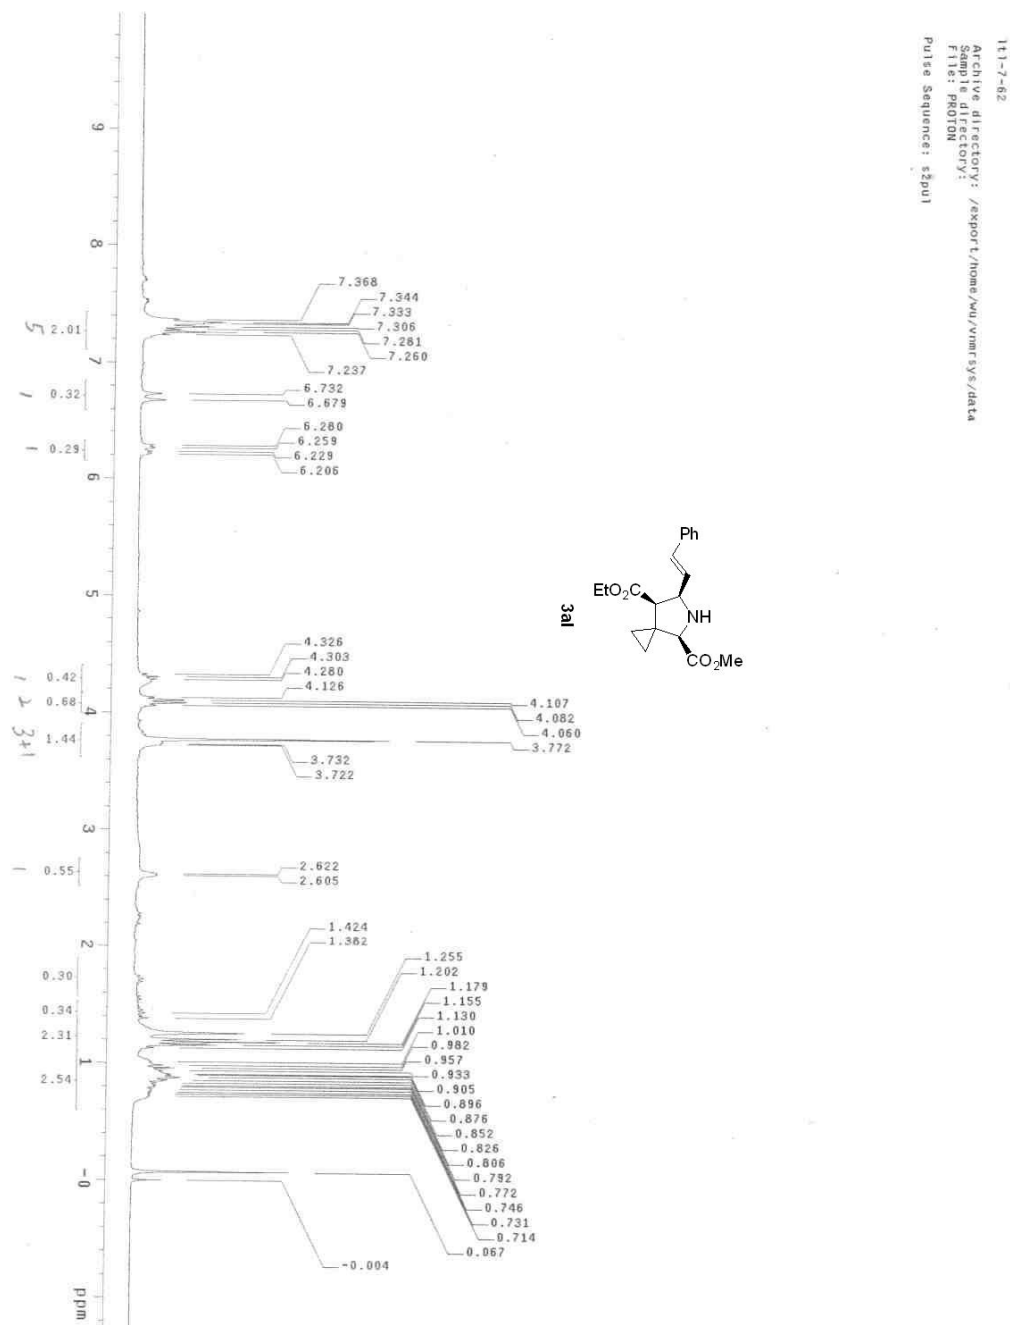



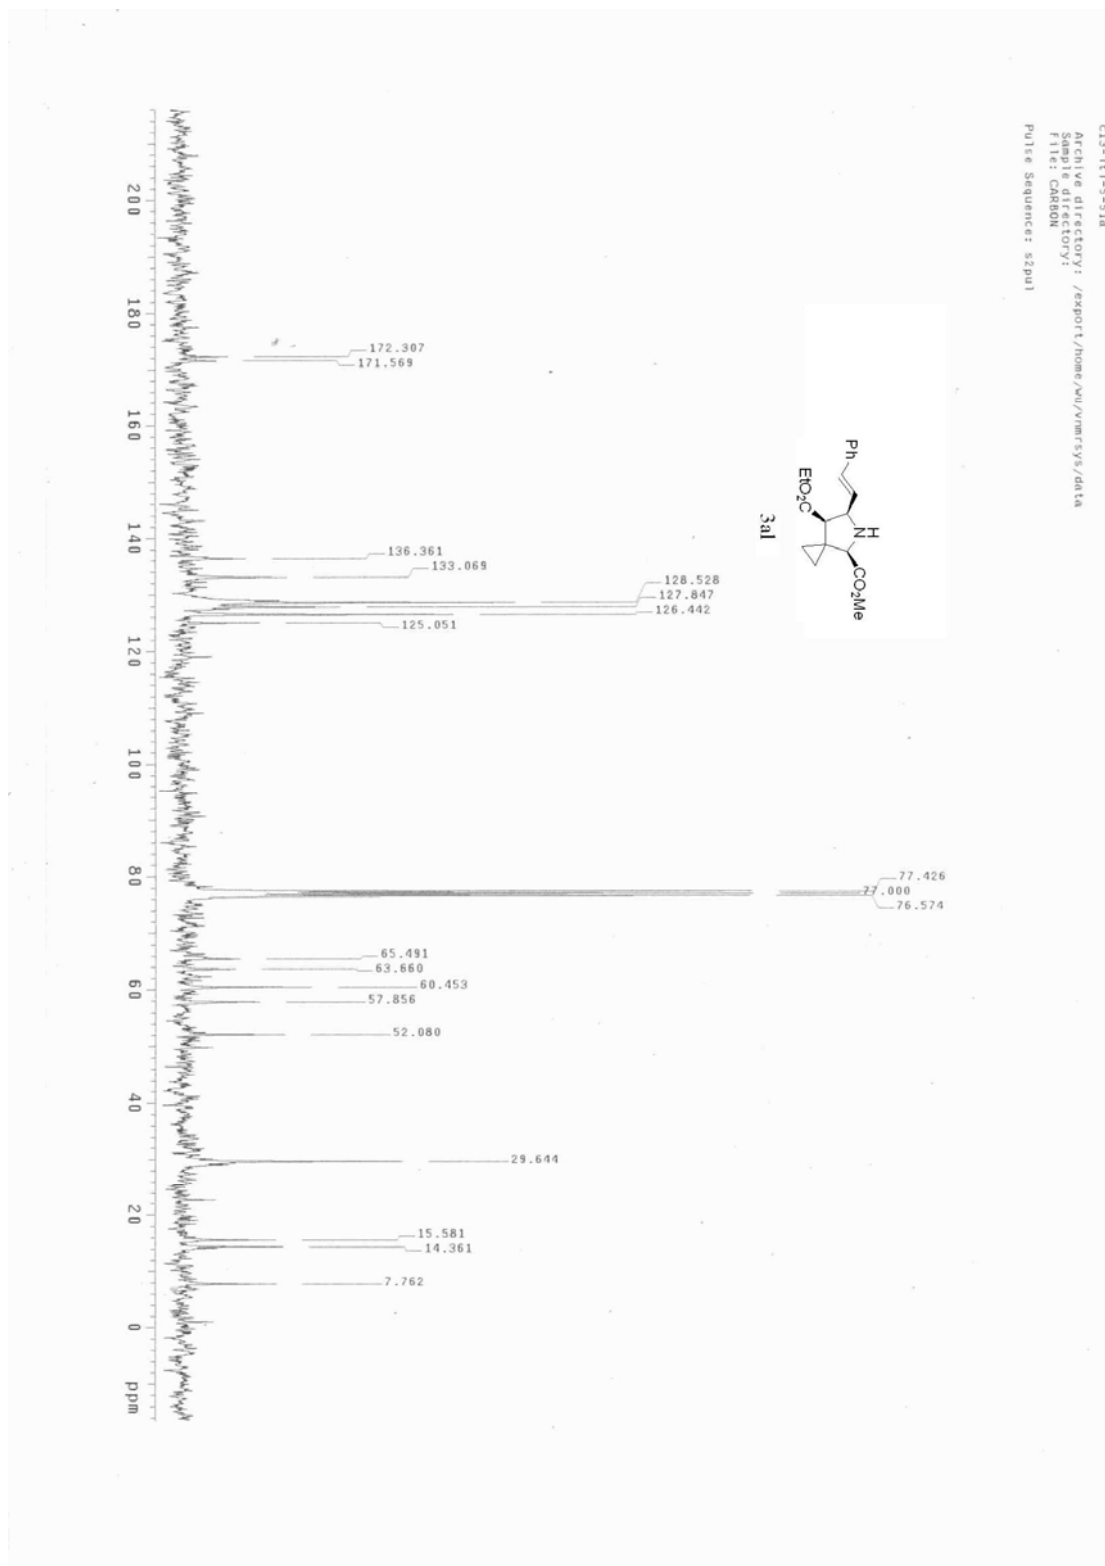

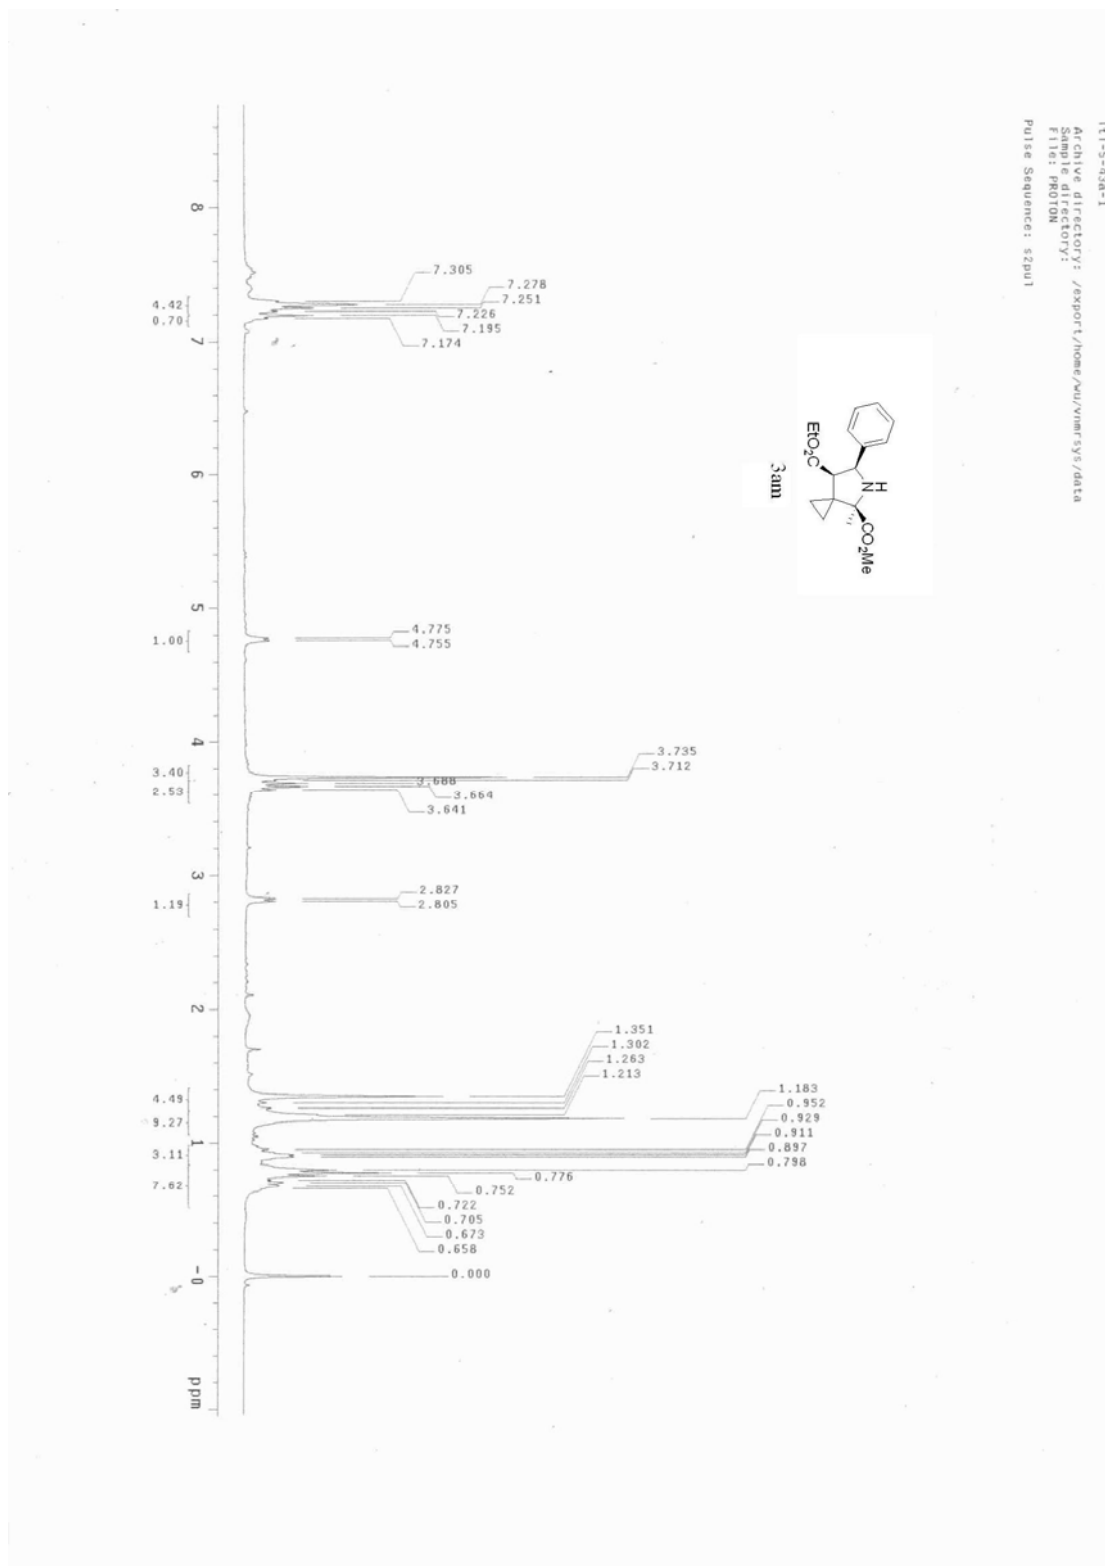

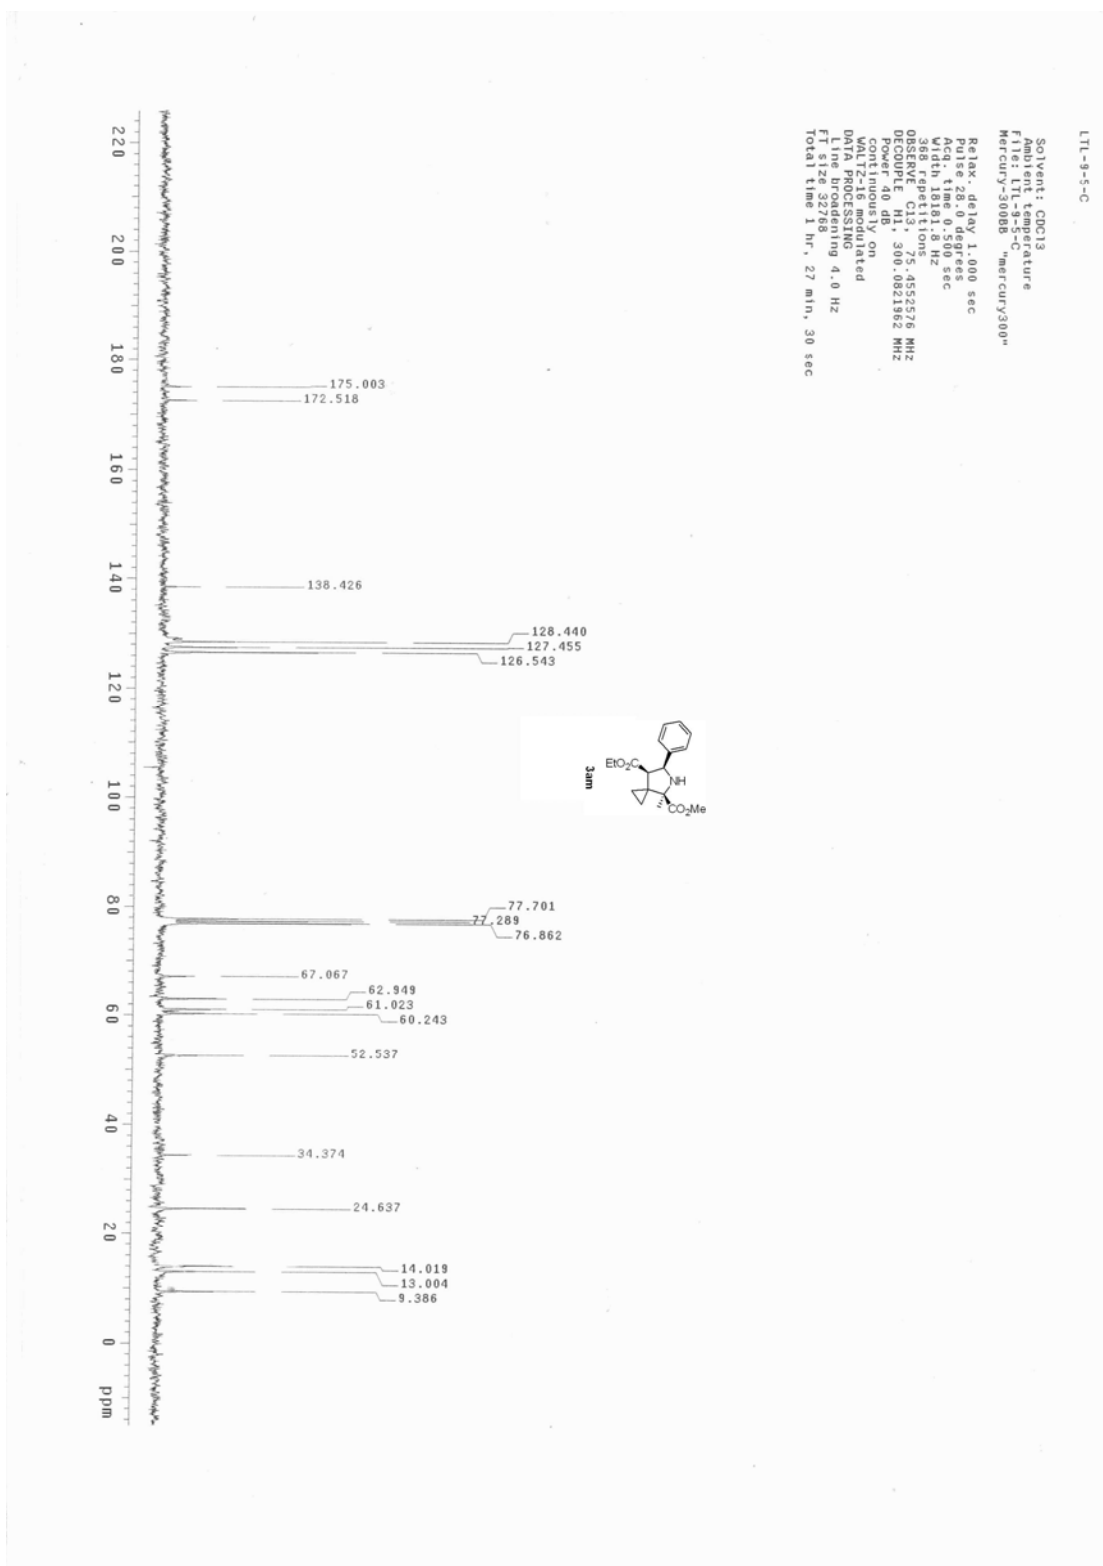

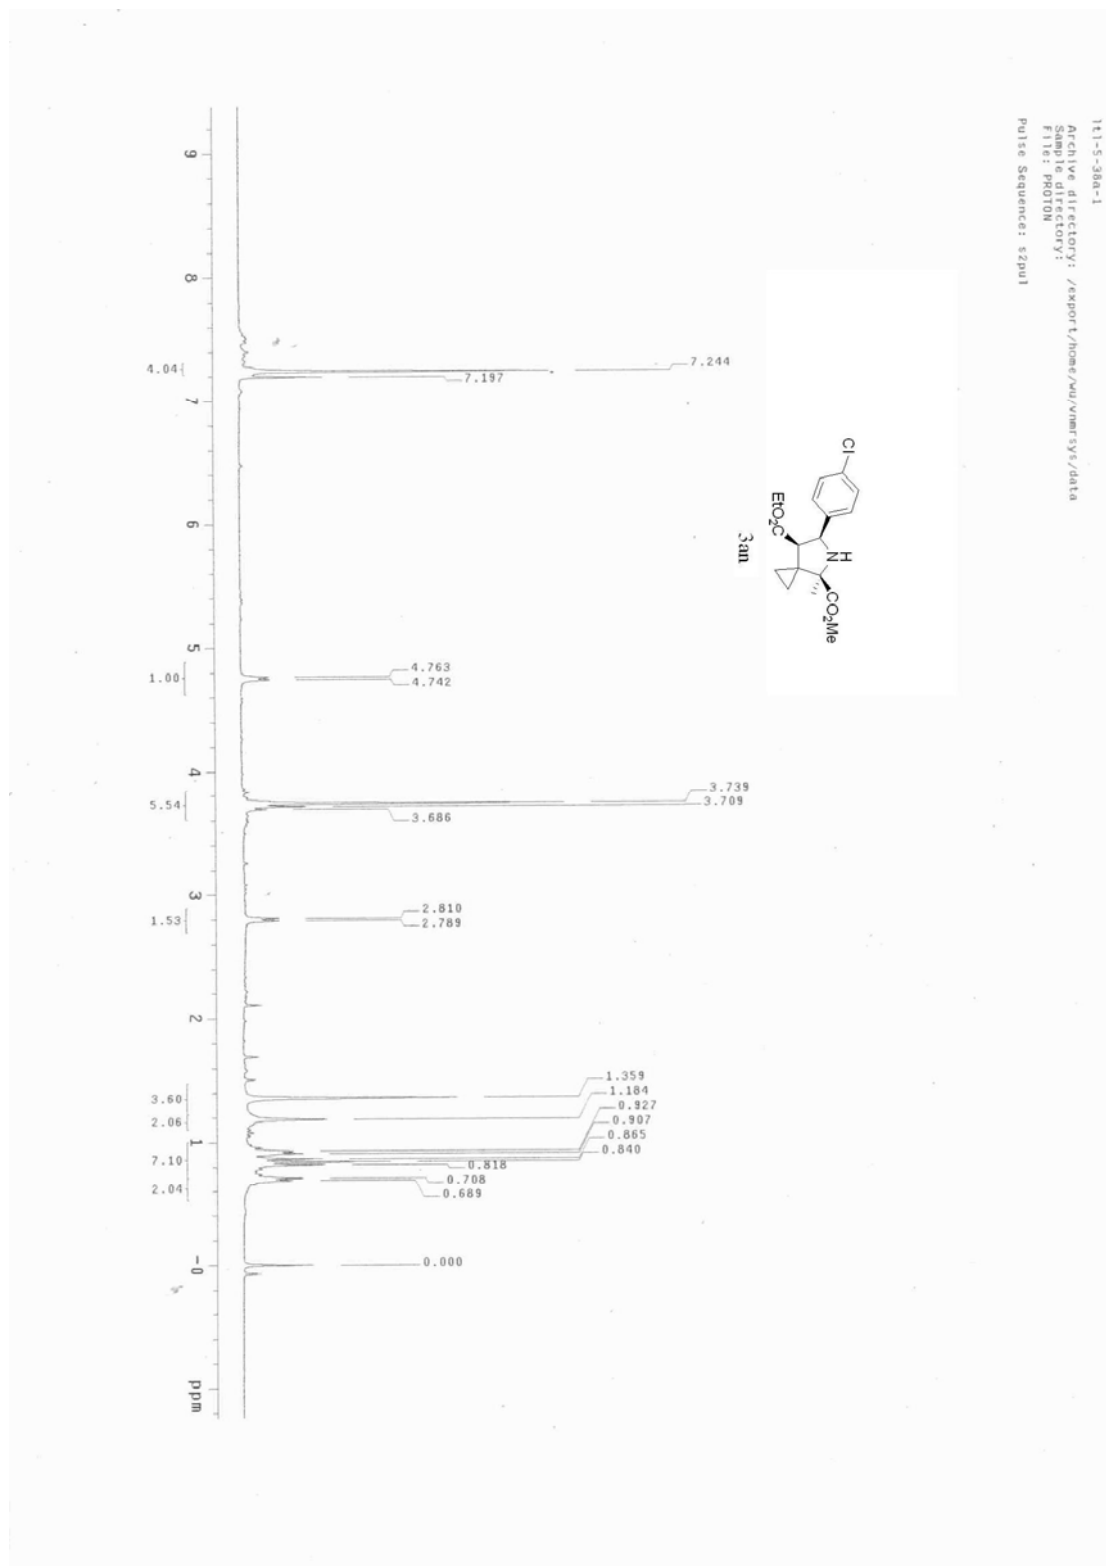

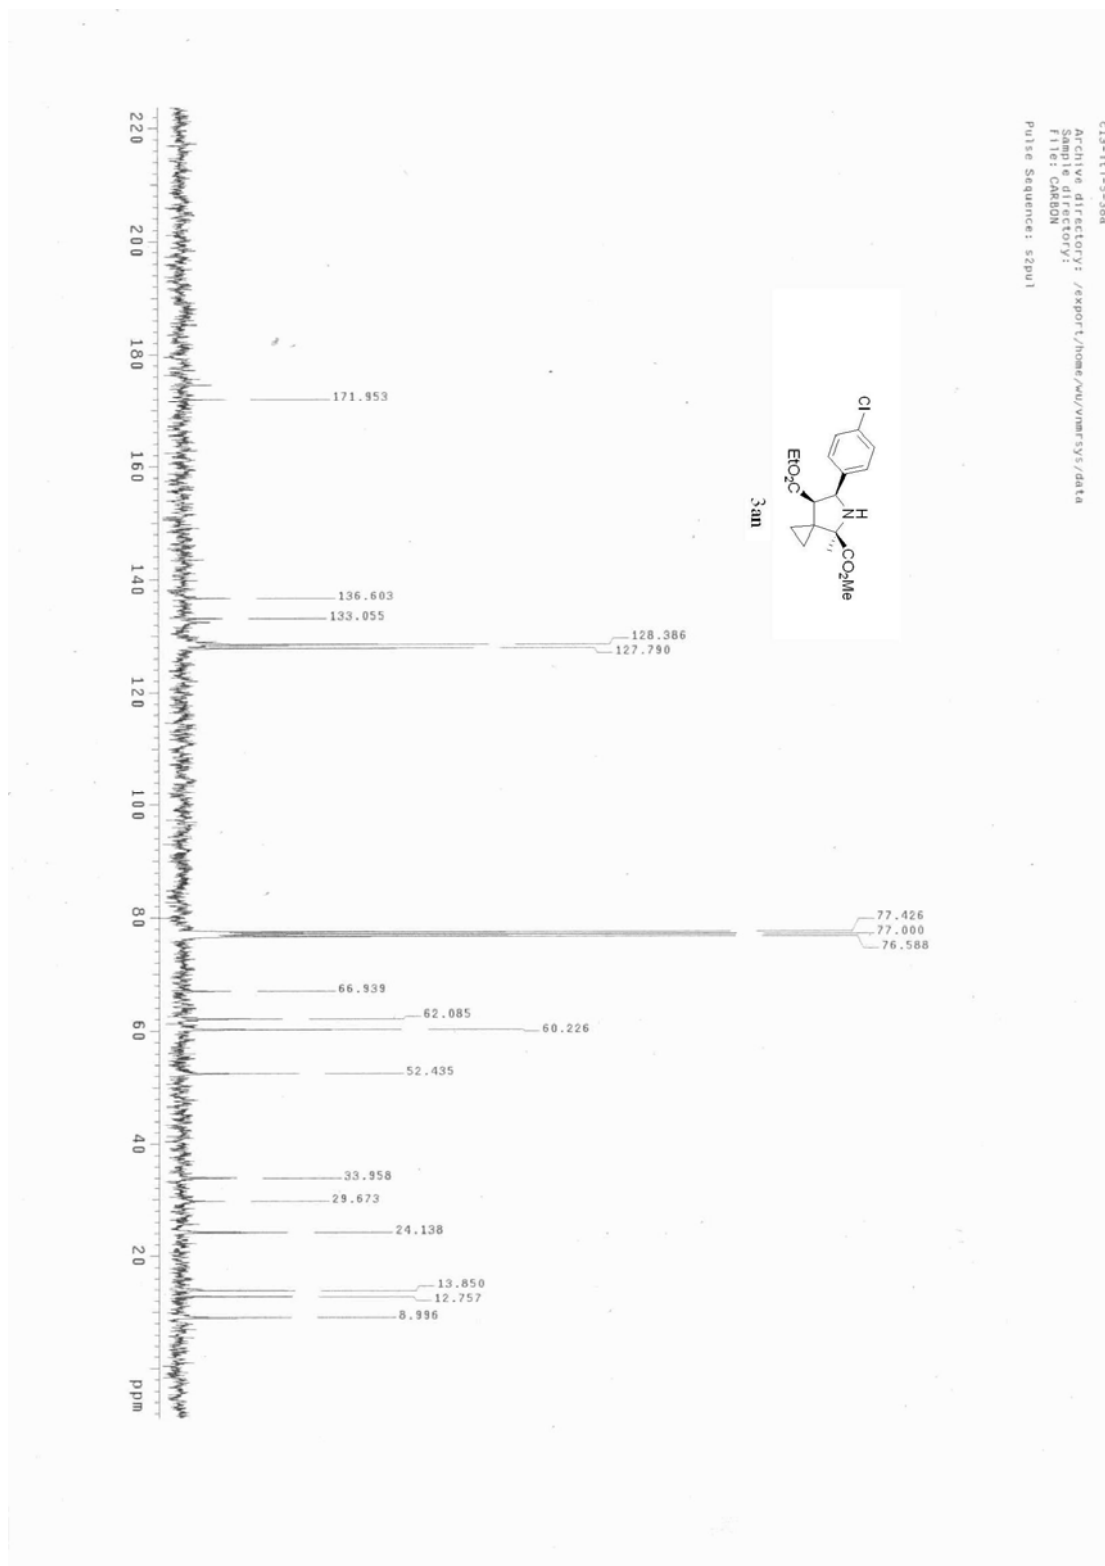

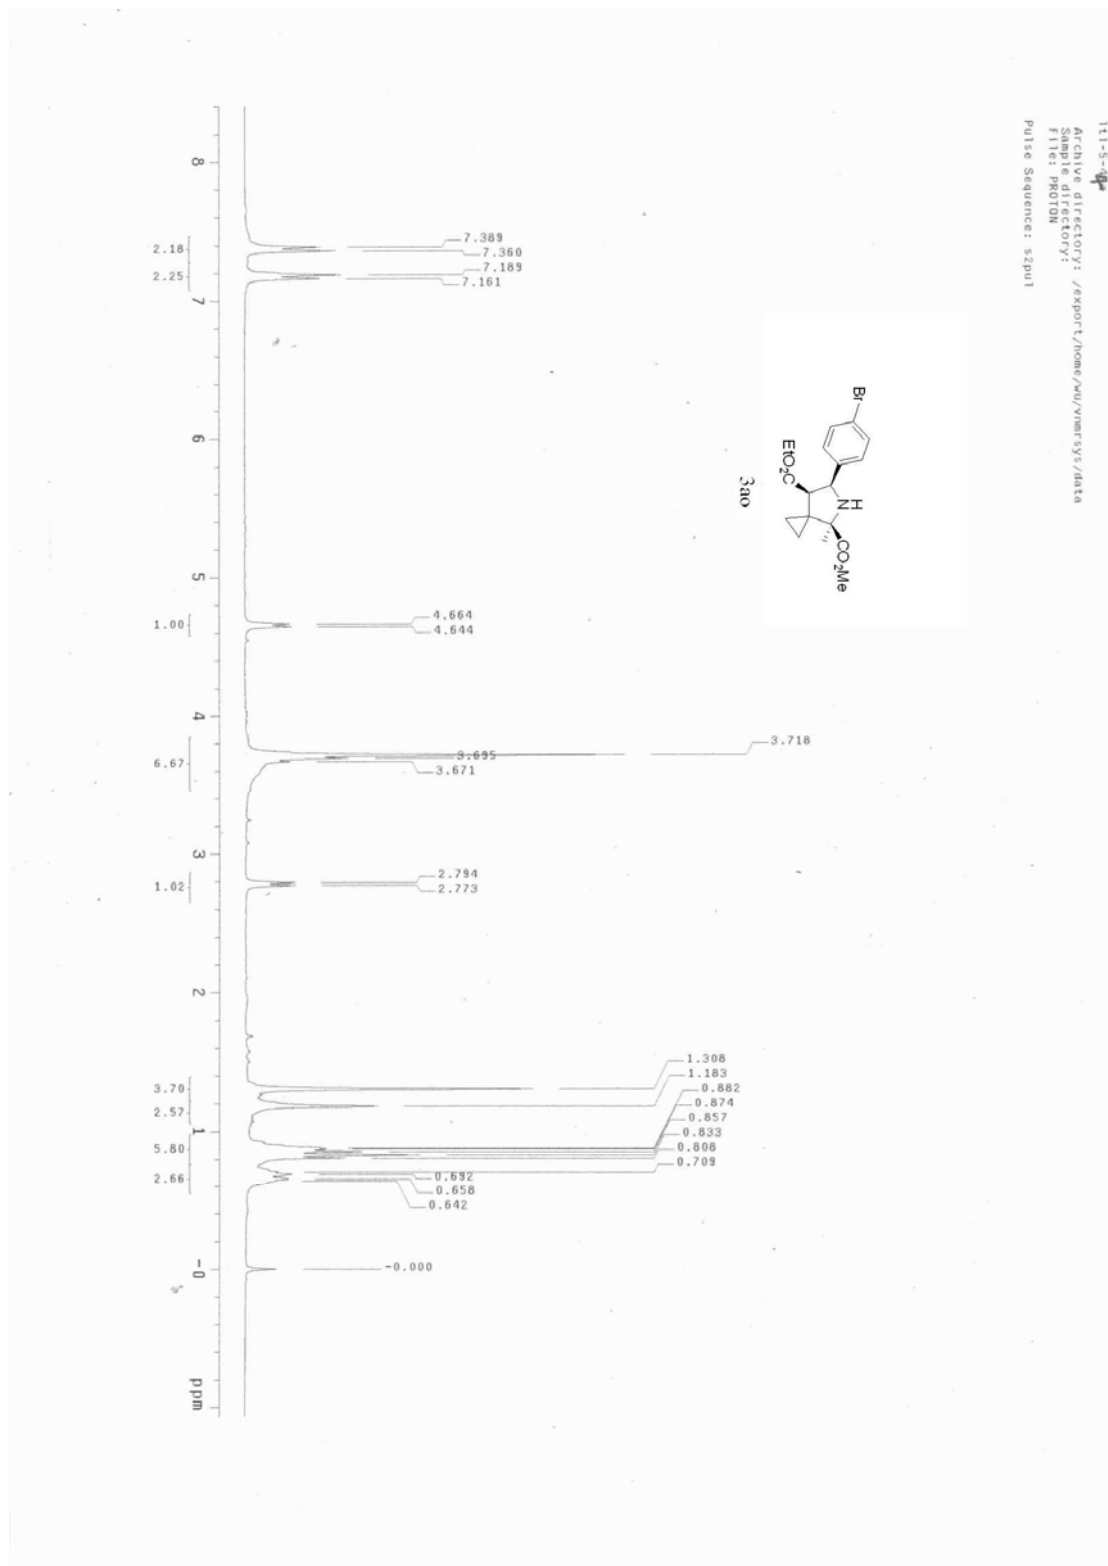

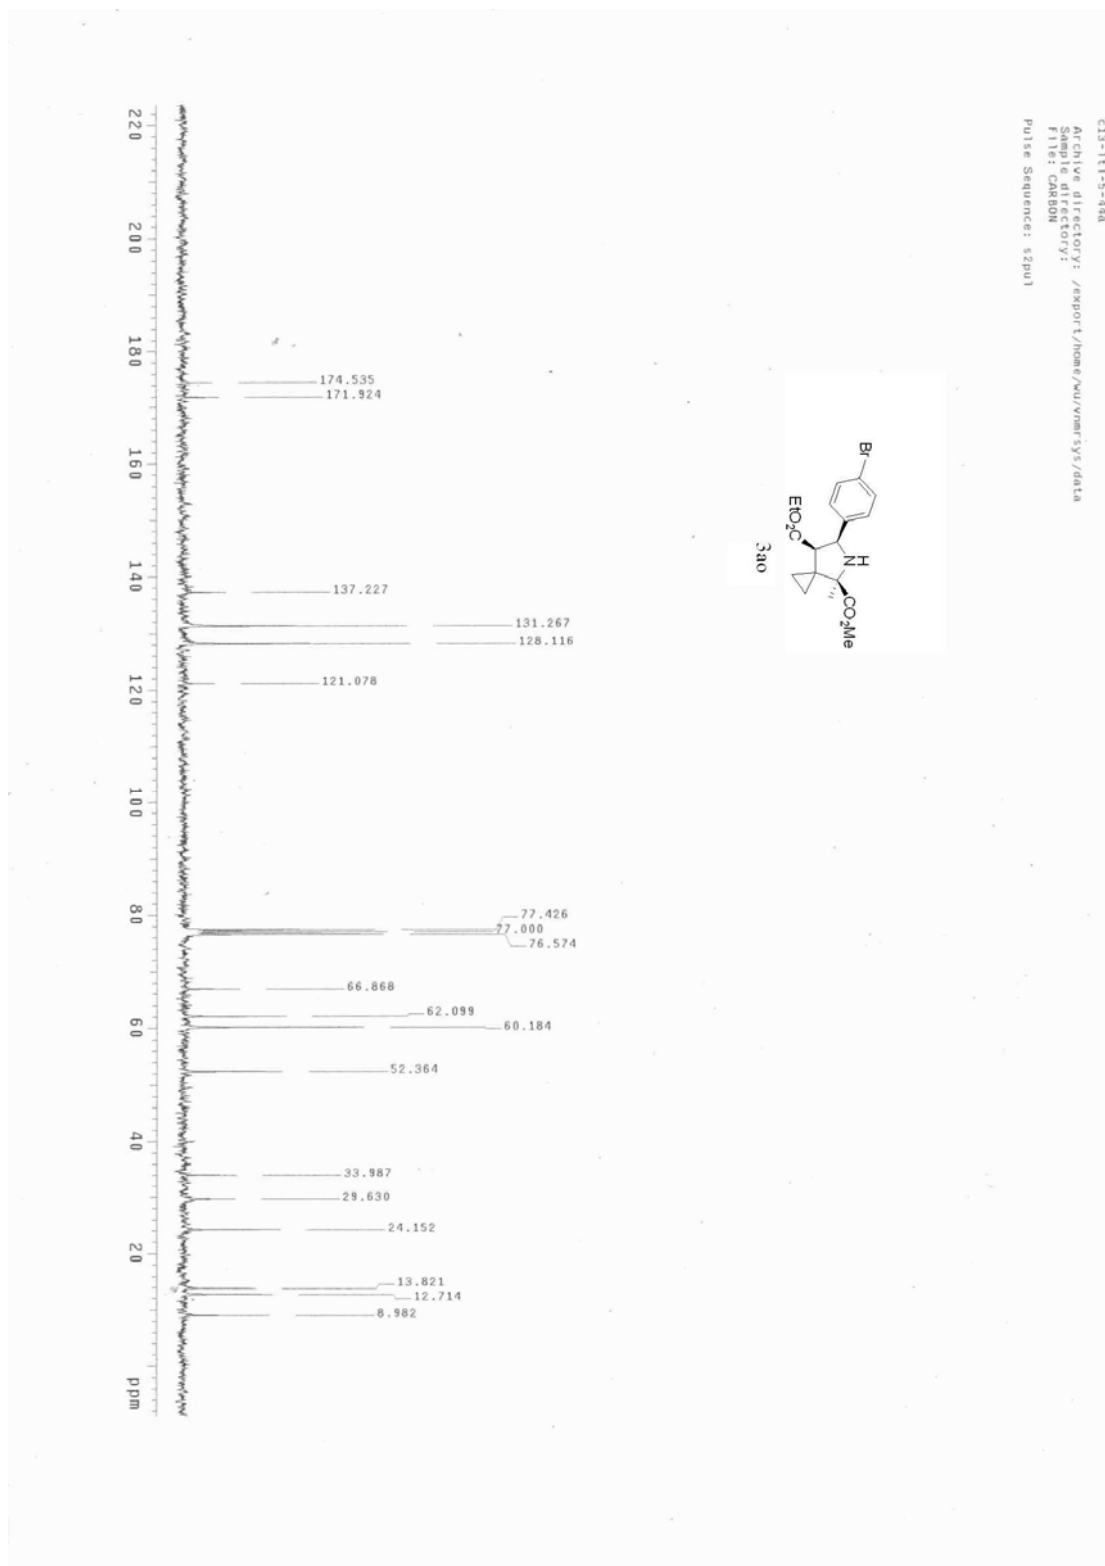

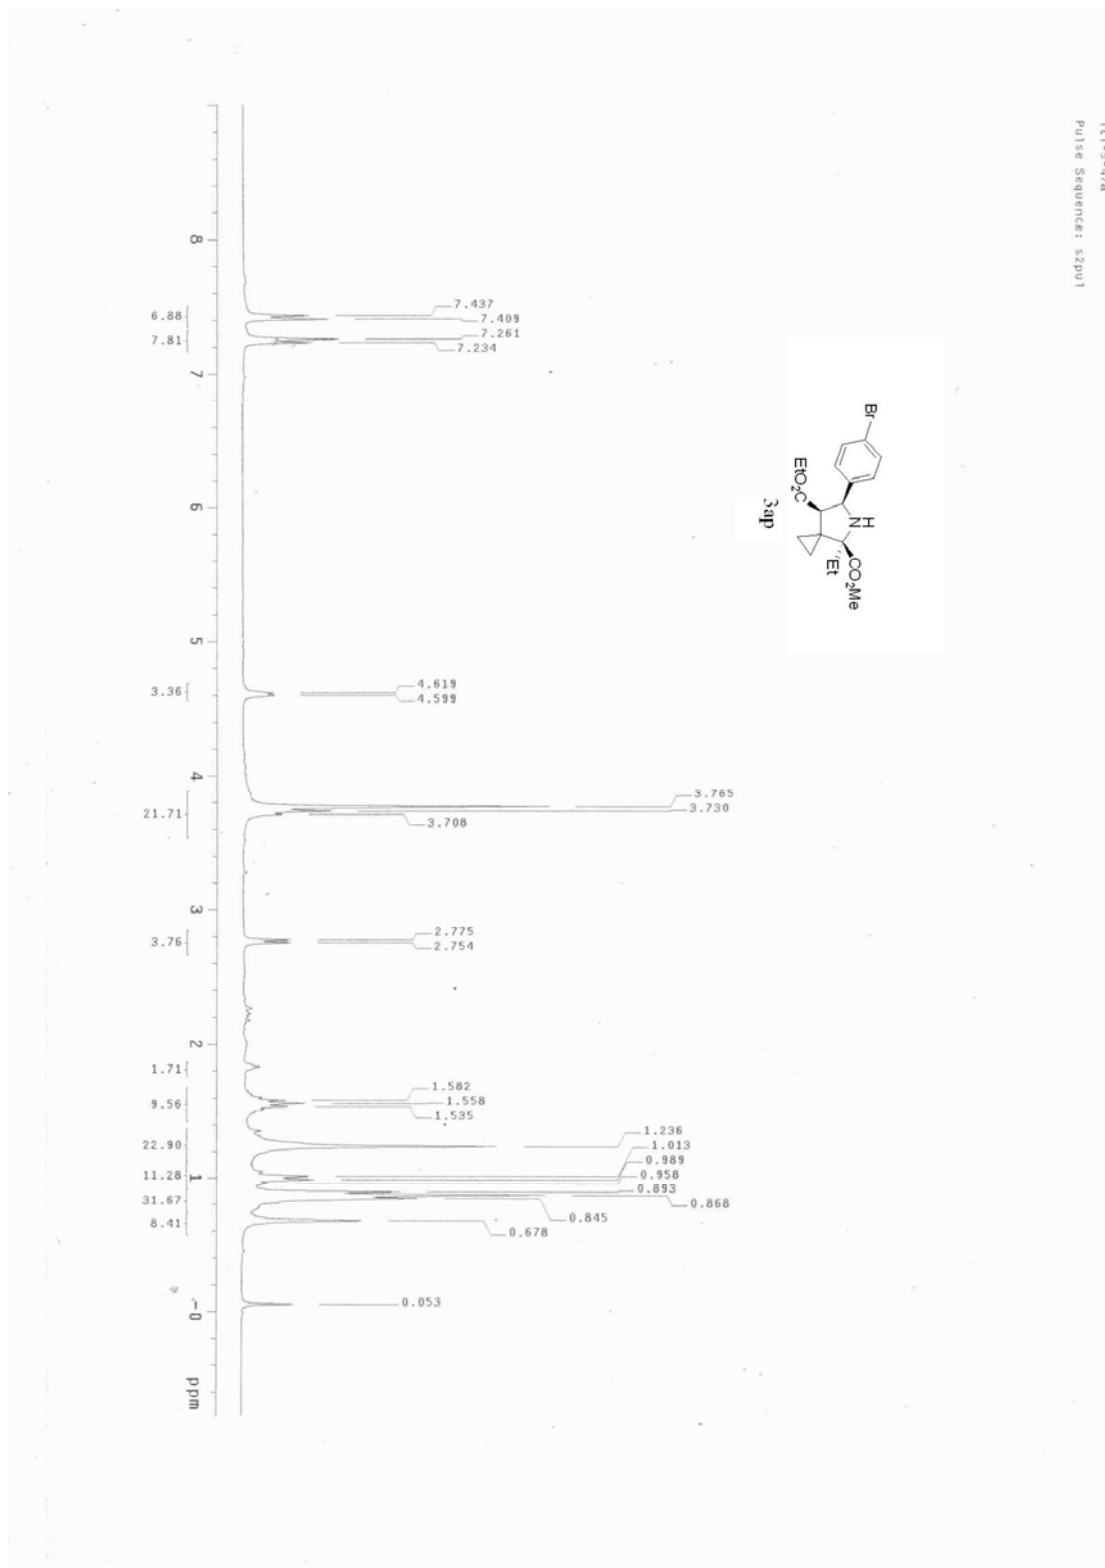



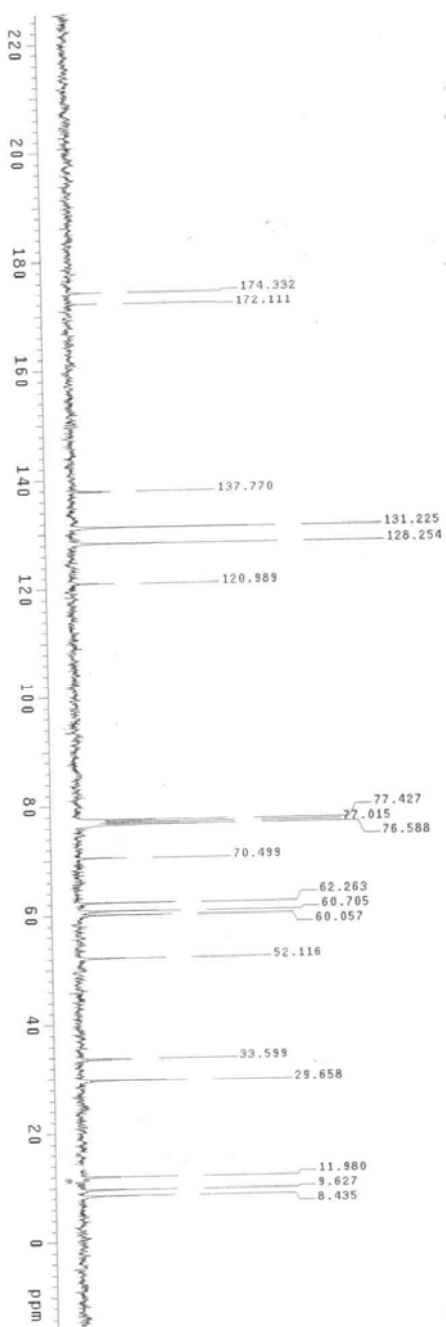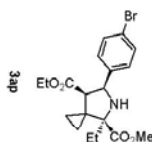

C13-1t1-9-5b  
Solvent: CDCl3  
Ambient temperature  
Mercury-300BB "mercury300"  
Pulse delay 1.000 sec  
Pulse 28.0 degrees  
Acq. time 0.500 sec  
Width 18181.8 Hz  
Observed frequency 50.625450 MHz  
Observed chemical shift 5.4552794 MHz  
Decouple H1 300.0821962 MHz  
Power 40 dB  
Continuously on  
Pulse program  
DATA PROCESSING  
Line broadening 4.0 Hz  
FT size 32768  
Total time 1 hr, 27 min, 30 sec

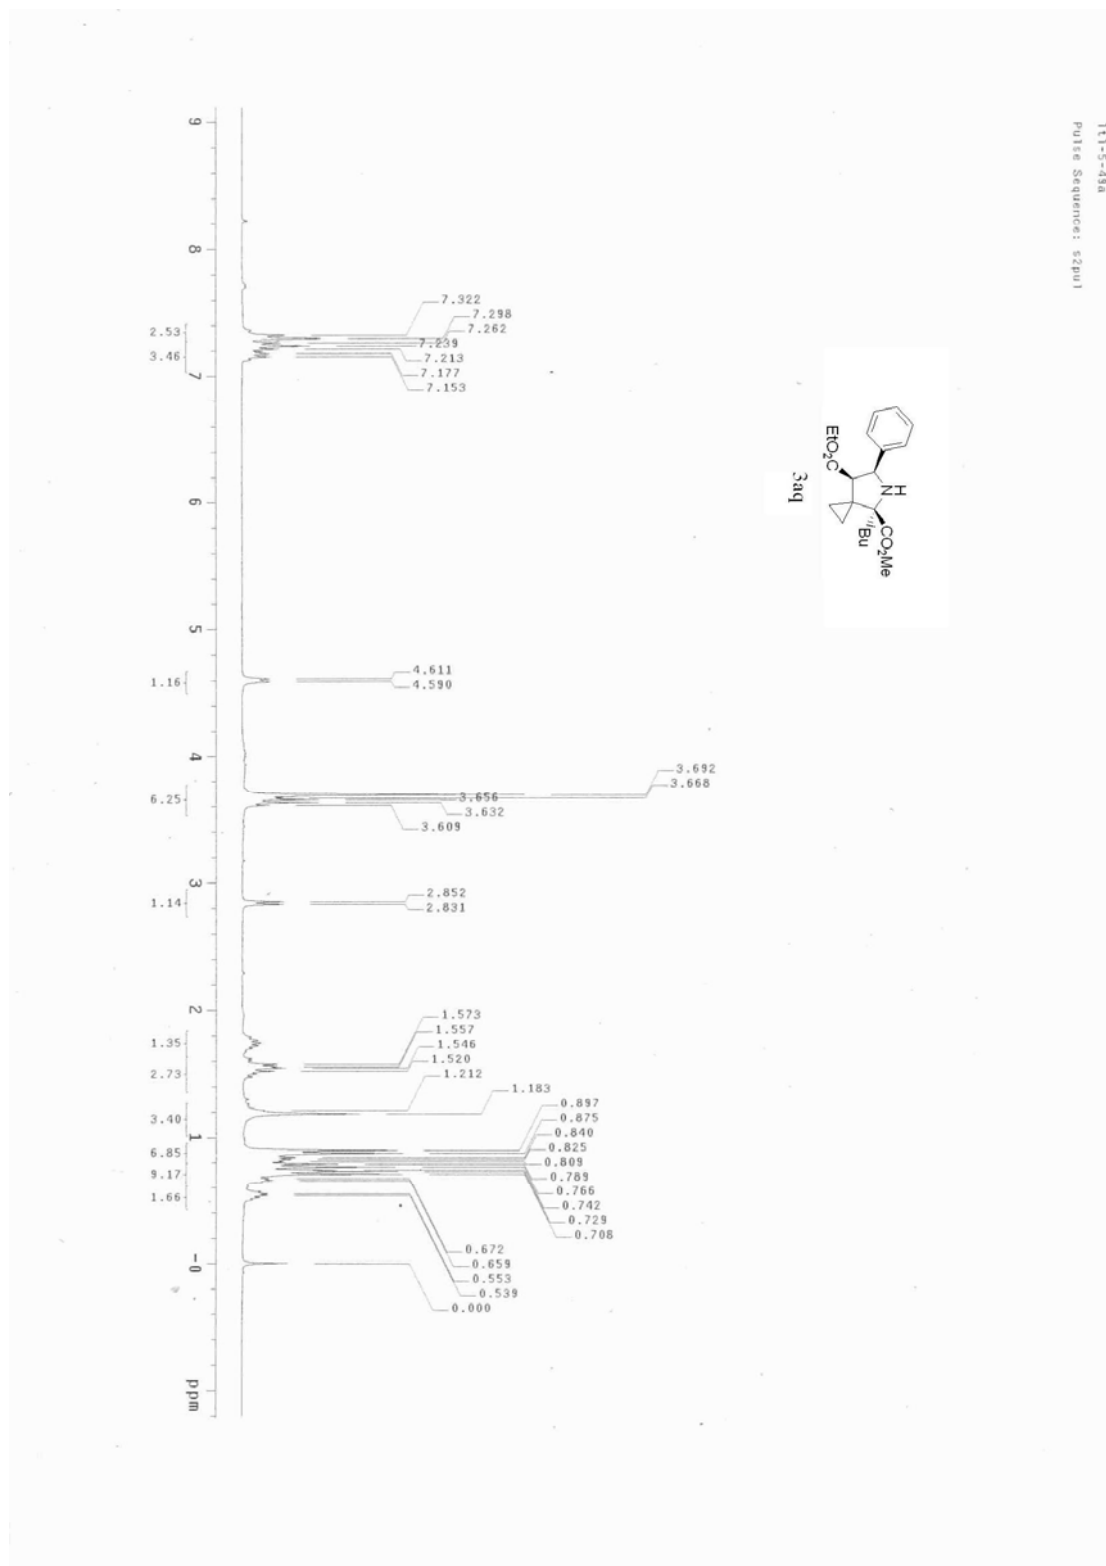

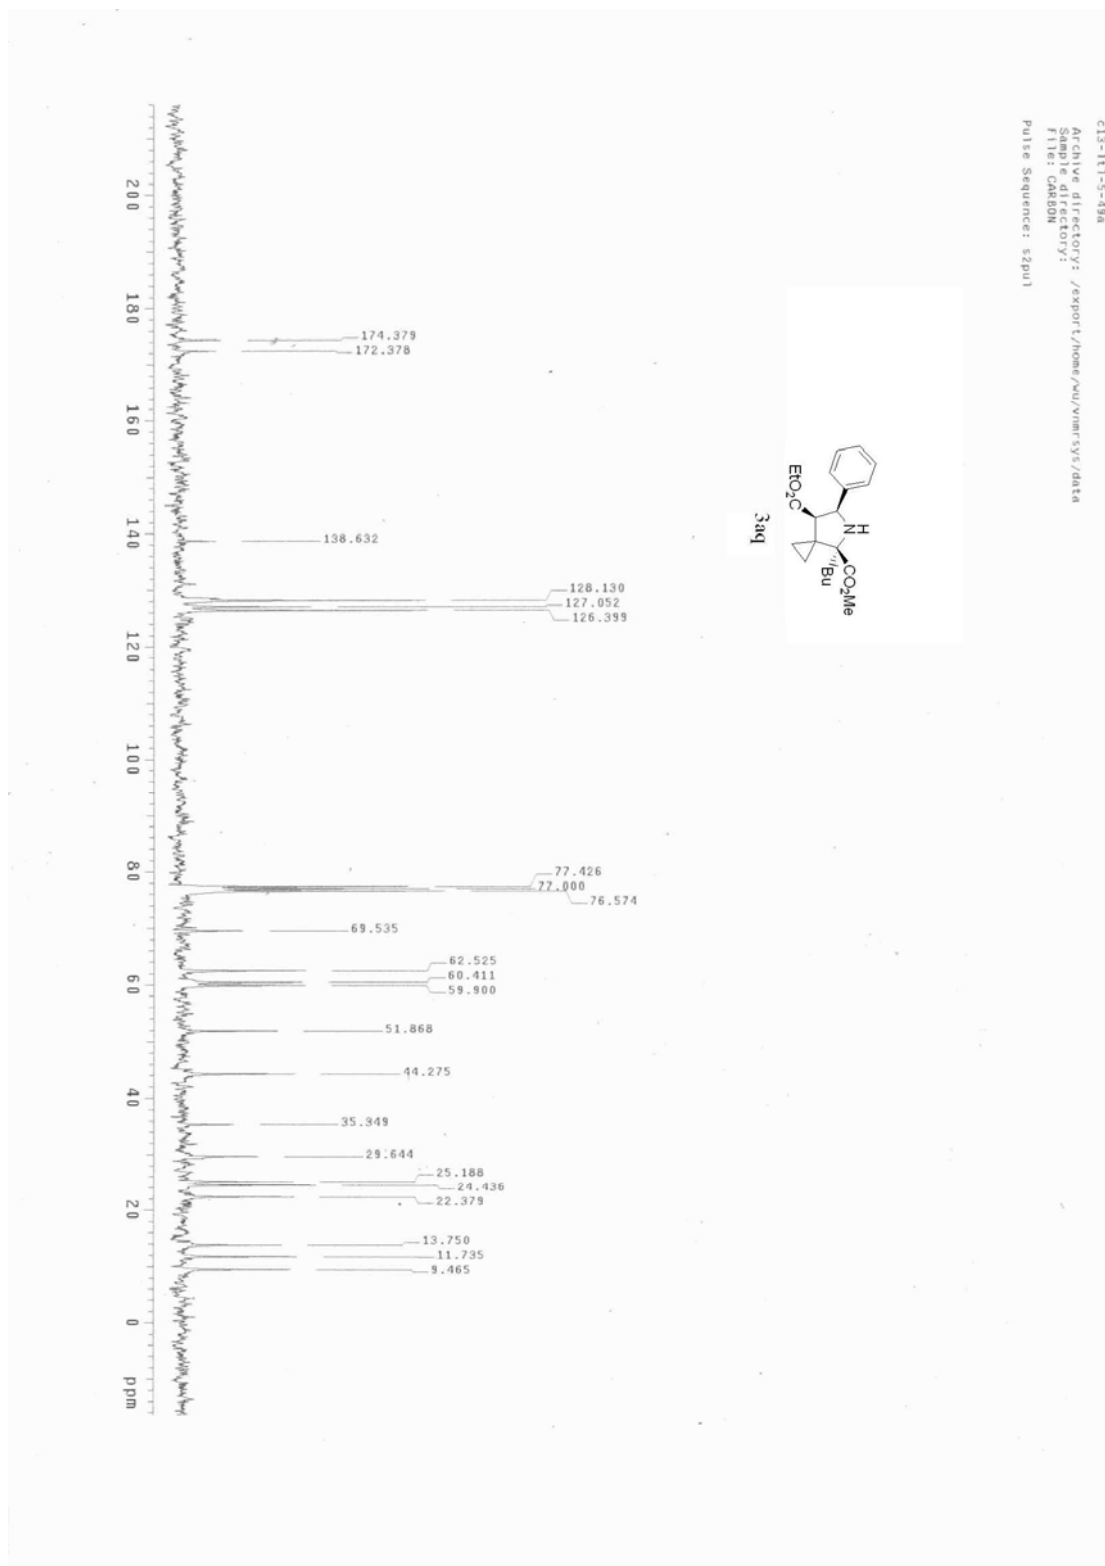

Data File D:\LC\LTL\DATA\LTL-5-7\LTL-5-7-10-AS-220 2010-03-31 16-05-42\SIG1000002.D  
 Sample Name: LTL-5-7-1.0-AS-220

```

=====
Acq. Operator   : LTL                               Seq. Line :    2
Acq. Instrument : Instrument 1                       Location  : Vial 32
Injection Date  : 3/31/2010 4:18:05 PM              Inj       :    1
                                                    Inj Volume: 5 µl
Acq. Method     : D:\LC\LTL\data\LTL-5-7\LTL-5-7-10-AS-220 2010-03-31 16-05-42\ASH-10-90-
10ML-220NM-60MIN.M
Last changed    : 11/15/2009 6:41:50 PM by DXQ
Analysis Method : D:\LC\LTL\DATA\LTL-5-7\LTL-5-7-10-AS-220 2010-03-31 16-05-42\SIG1000002.D\
D.M (ASH-10-90-10ML-220NM-60MIN.M)
Last changed    : 4/3/2010 9:49:57 AM by THL
(modified after loading)
    
```

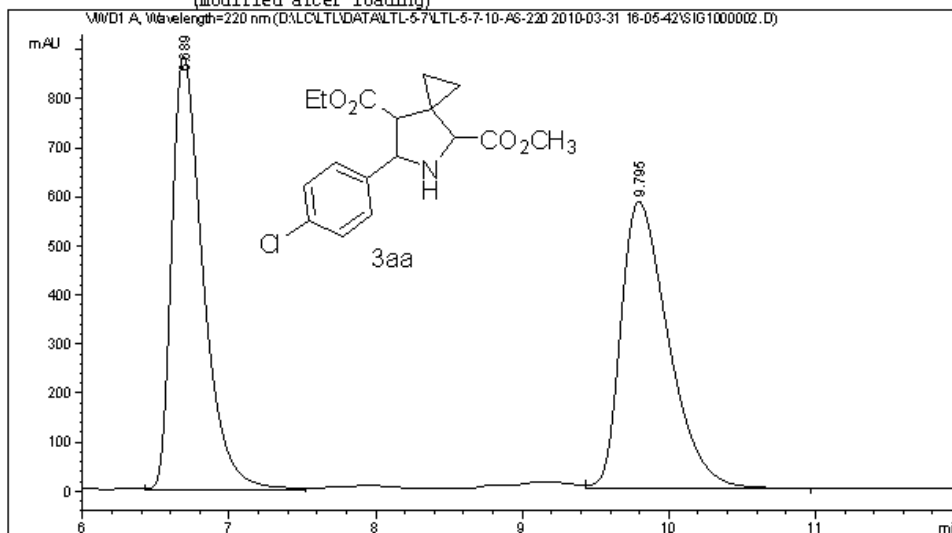

Area Percent Report

```

Sorted By      :      Signal
Multiplier     :      1.0000
Dilution       :      1.0000
Use Multiplier & Dilution Factor with ISTDs
    
```

Signal 1: WVD1 A, Wavelength=220 nm

| Peak # | RetTime [min] | Type | Width [min] | Area mAU  | Height [mAU] | Area %  |
|--------|---------------|------|-------------|-----------|--------------|---------|
| 1      | 6.689         | WV   | 0.2253      | 1.30994e4 | 883.82678    | 49.8755 |
| 2      | 9.795         | WB   | 0.3455      | 1.31648e4 | 585.05493    | 50.1245 |

Totals :                      2.62643e4  1468.88171

Data File D:\LC\LTL\DATA\LTL-5-18\LTL-5-18 2010-04-10 10-52-58\SIG1000002.D  
 Sample Name: LTL-5-18

```

=====
Acq. Operator   : LTL                               Seq. Line :    2
Acq. Instrument : Instrument 1                       Location  : Vial 25
Injection Date  : 4/10/2010 11:05:26 AM             Inj       :    1
                                                    Inj Volume: 5 µl
Acq. Method     : D:\LC\LTL\data\LTL-5-18\LTL-5-18 2010-04-10 10-52-58\ASH-10-90-10ML-220NM-
14MIN.M
Last changed    : 4/3/2010 9:58:28 AM by THL
Analysis Method : D:\LC\LTL\DATA\LTL-5-18\LTL-5-18 2010-04-10 10-52-58\SIG1000002.D\DA.M (
ASH-10-90-10ML-220NM-14MIN.M)
Last changed    : 4/10/2010 11:22:17 AM by tmc
(modified after loading)
    
```

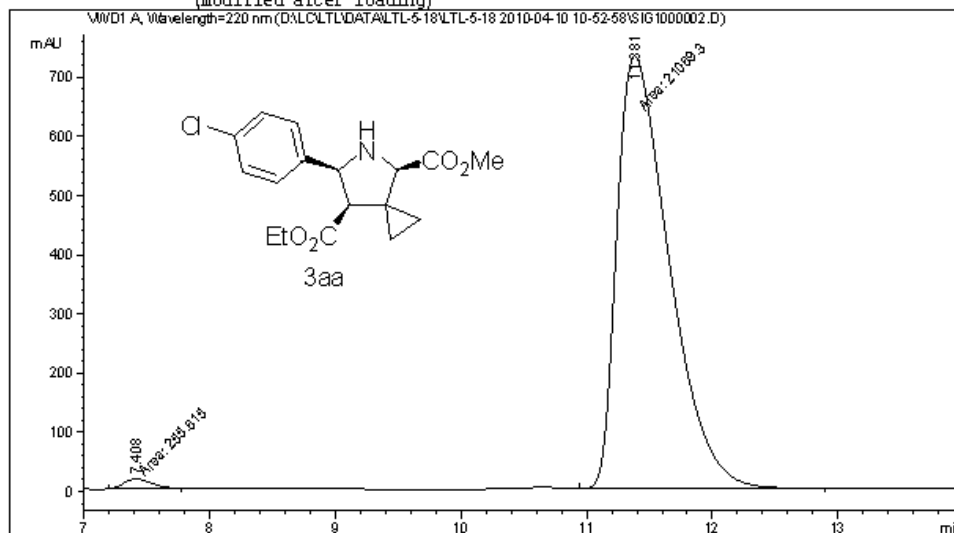

Area Percent Report

```

=====
Sorted By      :      Signal
Multiplier     :      1.0000
Dilution       :      1.0000
Use Multiplier & Dilution Factor with ISTDs
    
```

Signal 1: VMD1 A, Wavelength=220 nm

| Peak #   | RetTime [min] | Type | Width [min] | Area mAU  | Height [mAU] | Area %  |
|----------|---------------|------|-------------|-----------|--------------|---------|
| 1        | 7.408         | MM   | 0.2554      | 255.61493 | 16.67875     | 1.1987  |
| 2        | 11.381        | MM   | 0.4807      | 2.10693e4 | 730.46185    | 98.8013 |
| Totals : |               |      |             | 2.13250e4 | 747.14061    |         |

Instrument 1 4/10/2010 11:22:23 AM tmc

Page 1 of 1

Data File D:\LC\LTL\DATA\LTL-5-28\LTL-5-28 2010-04-16 08-14-35\SIG1000002.D  
 Sample Name: LTL-5-28A

```

=====
Acq. Operator   : LTL                      Seq. Line :    2
Acq. Instrument : Instrument 1              Location  : Vial 24
Injection Date  : 4/16/2010 8:27:09 AM     Inj       :    1
                                                Inj Volume: 5 µl
Acq. Method     : D:\LC\LTL\data\LTL-5-28\LTL-5-28 2010-04-16 08-14-35\ASH-10-90-10ML-220NM-
20MIN.M
Last changed    : 3/31/2010 4:54:37 PM by LTL
Analysis Method : D:\LC\LTL\DATA\LTL-5-28\LTL-5-28 2010-04-16 08-14-35\SIG1000002.D\DA.M (
ASH-10-90-10ML-220NM-20MIN.M)
Last changed    : 4/16/2010 9:38:00 AM by TMC
(modified after loading)
    
```

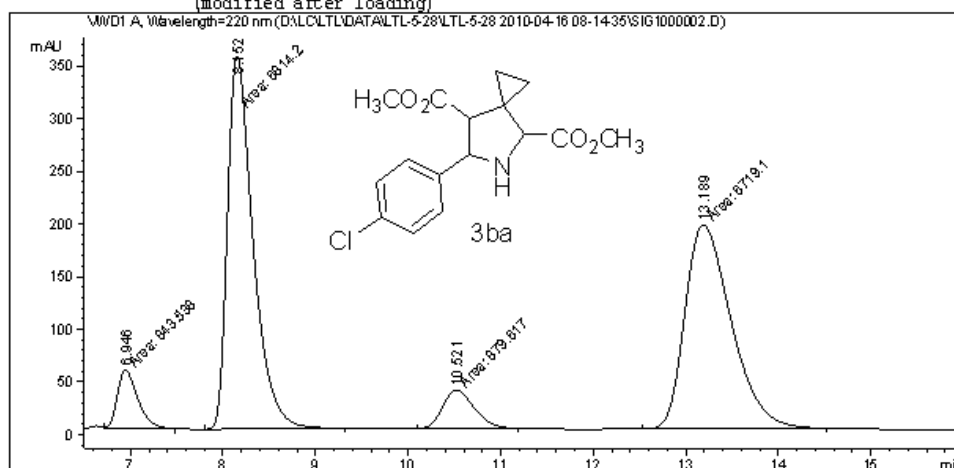

=====  
 Area Percent Report  
 =====

```

Sorted By      :      Signal
Multiplier     :      1.0000
Dilution       :      1.0000
Use Multiplier & Dilution Factor with ISTDs
    
```

Signal 1: VMD1 A, Wavelength=220 nm

| Peak # | RetTime [min] | Type | Width [min] | Area mAU   | Height [mAU] | Area %  |
|--------|---------------|------|-------------|------------|--------------|---------|
| 1      | 6.946         | MM   | 0.2547      | 843.53784  | 55.20173     | 5.5291  |
| 2      | 8.152         | MM   | 0.3208      | 6814.19873 | 354.07333    | 44.6644 |
| 3      | 10.521        | MM   | 0.3992      | 879.61652  | 36.72753     | 5.7655  |
| 4      | 13.189        | MM   | 0.5782      | 6719.09766 | 193.67729    | 44.0410 |

Totals :                      1.52565e4    639.67988

=====  
 \*\*\* End of Report \*\*\*

Data File D:\LC\LTL\DATA\LTL-5-28\LTL-5-28 2010-04-16 08-14-35\SIG1000003.D  
 Sample Name: LTL-5-28B

```

=====
Acq. Operator   : LTL                      Seq. Line :    3
Acq. Instrument : Instrument 1              Location  : Vial 25
Injection Date  : 4/16/2010 8:48:29 AM     Inj       :    1
                                           Inj Volume: 5 µl
Acq. Method     : D:\LC\LTL\data\LTL-5-28\LTL-5-28 2010-04-16 08-14-35\ASH-10-90-10ML-220NM-
20MIN.M
Last changed    : 3/31/2010 4:54:37 PM by LTL
Analysis Method : D:\LC\LTL\DATA\LTL-5-28\LTL-5-28 2010-04-16 08-14-35\SIG1000003.D\DA.M (
ASH-10-90-10ML-220NM-20MIN.M)
Last changed    : 4/16/2010 9:36:37 AM by TMC
(modified after loading)
    
```

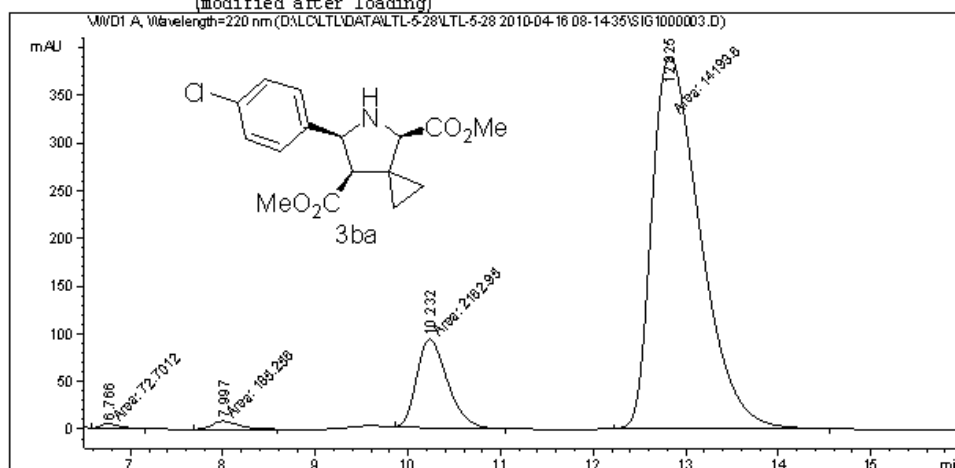

=====  
 Area Percent Report  
 =====

```

Sorted By      :      Signal
Multiplier     :      1.0000
Dilution       :      1.0000
Use Multiplier & Dilution Factor with ISTDs
    
```

Signal 1: VMD1 A, Wavelength=220 nm

| Peak # | RetTime [min] | Type | Width [min] | Area mAU   | Height [mAU] | Area %  |
|--------|---------------|------|-------------|------------|--------------|---------|
| 1      | 6.766         | MM   | 0.2508      | 72.70116   | 4.83173      | 0.4376  |
| 2      | 7.997         | MM   | 0.3480      | 185.25603  | 8.87340      | 1.1150  |
| 3      | 10.232        | MM   | 0.3886      | 2162.94849 | 92.77558     | 13.0184 |
| 4      | 12.825        | MM   | 0.6055      | 1.41936e4  | 390.71750    | 85.4290 |

Totals :                                    1.66145e4    497.19820

=====  
 \*\*\* End of Report \*\*\*

Data File D:\LC\LTL\DATA\LTL-5-32-33\LTL-5-32A 2010-04-17 15-17-50\SIG1000002.D  
 Sample Name: LTL-5-32A

```

=====
Acq. Operator   : LTL                               Seq. Line :    2
Acq. Instrument : Instrument 1                       Location  : Vial 61
Injection Date  : 4/17/2010 3:30:13 PM             Inj       :    1
                                                    Inj Volume: 5 µl
Acq. Method     : D:\LC\LTL\data\LTL-5-32-33\LTL-5-32A 2010-04-17 15-17-50\ASH-10-90-10ML-
                220NM-60MIN.M
Last changed    : 11/15/2009 6:41:50 PM by DXQ
Analysis Method : D:\LC\LTL\DATA\LTL-5-32-33\LTL-5-32A 2010-04-17 15-17-50\SIG1000002.D\DA.M
                (ASH-10-90-10ML-220NM-60MIN.M)
Last changed    : 4/17/2010 5:36:32 PM by LTL
                (modified after loading)
    
```

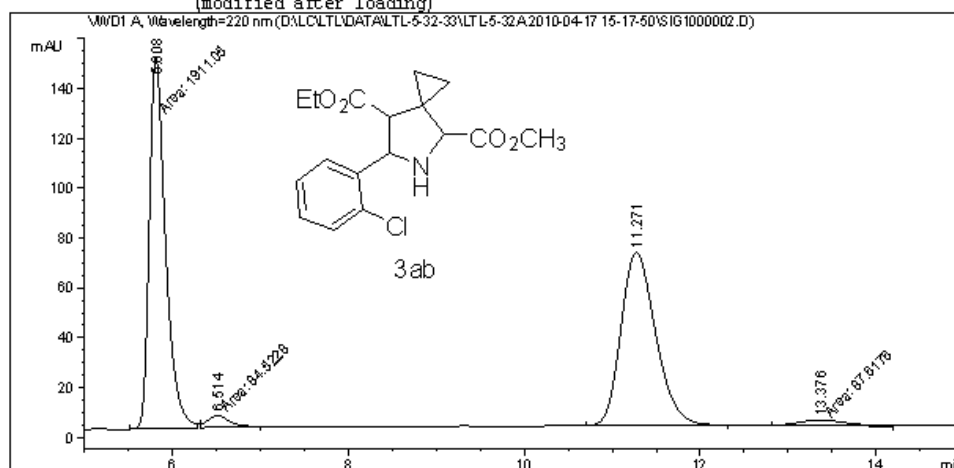

=====  
 Area Percent Report  
 =====

Sorted By : Signal  
 Multiplier : 1.0000  
 Dilution : 1.0000  
 Use Multiplier & Dilution Factor with ISTDs

Signal 1: WWD1 A, Wavelength=220 nm

| Peak # | RetTime [min] | Type | Width [min] | Area mAU   | Area %  | Height [mAU] |
|--------|---------------|------|-------------|------------|---------|--------------|
| 1      | 5.808         | MF   | 0.2130      | 1911.05139 | 47.8540 | 149.55931    |
| 2      | 6.514         | MM   | 0.2842      | 84.52280   | 2.1165  | 4.95612      |
| 3      | 11.271        | BF   | 0.4253      | 1910.31030 | 47.8355 | 69.54221     |
| 4      | 13.376        | MM   | 0.6479      | 87.61762   | 2.1940  | 2.25378      |

Totals : 3993.50212 226.31142

=====  
 \*\*\* End of Report \*\*\*





Data File D:\LC\TONG...2-LTL-5-19A-1\TMC-2-12-LTL-5-19A-1 2010-04-14 08-50-59\SIG1000003.D  
 Sample Name: LTL-5-19A-1

```

=====
Acq. Operator   : TMC                      Seq. Line :    3
Acq. Instrument : Instrument 1              Location  : Vial 16
Injection Date  : 4/14/2010 10:05:05 AM    Inj       :    1
                                           Inj Volume: 5 µl
Acq. Method     : D:\LC\Tong\Data\TMC-2-12-LTL-5-19A-1\TMC-2-12-LTL-5-19A-1 2010-04-14 08-
50-59\ASH-10-90-10ML-220NM-20MIN.M
Last changed    : 3/31/2010 4:54:37 PM by LTL
Analysis Method : D:\LC\TONG\DATA\TMC-2-12-LTL-5-19A-1\TMC-2-12-LTL-5-19A-1 2010-04-14 08-
50-59\SIG1000003.D\DA.M (ASH-10-90-10ML-220NM-20MIN.M)
Last changed    : 4/17/2010 3:20:08 PM by LTL
                  (modified after loading)
    
```

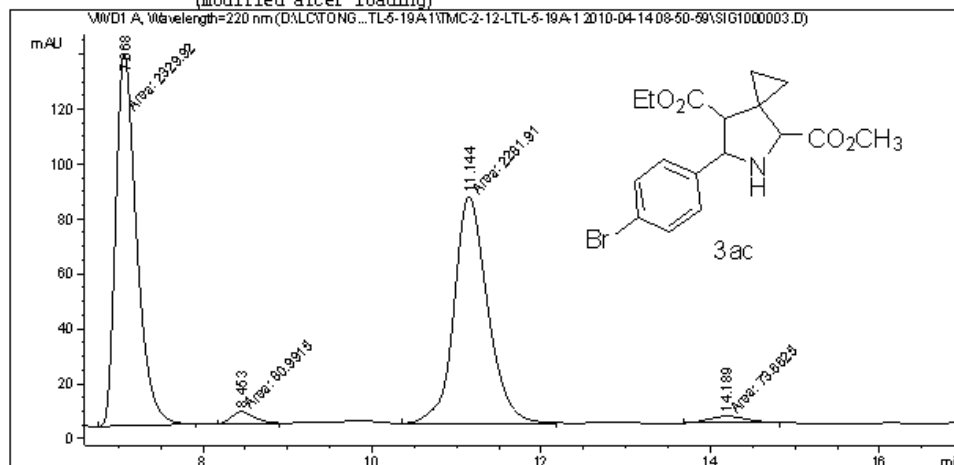

=====  
 Area Percent Report  
 =====

```

Sorted By      :      Signal
Multiplier     :      1.0000
Dilution       :      1.0000
Use Multiplier & Dilution Factor with ISTDs
    
```

Signal 1: VWD1 A, Wavelength=220 nm

| Peak # | RetTime [min] | Type | Width [min] | Area mAU *s | Height [mAU] | Area %  |
|--------|---------------|------|-------------|-------------|--------------|---------|
| 1      | 7.068         | MM   | 0.2862      | 2329.92407  | 135.66257    | 48.8813 |
| 2      | 8.453         | MM   | 0.3132      | 80.99151    | 4.31001      | 1.6992  |
| 3      | 11.144        | MM   | 0.4609      | 2281.91309  | 82.51217     | 47.8741 |
| 4      | 14.189        | MM   | 0.5210      | 73.66246    | 2.35661      | 1.5454  |

Totals :                    4766.49113   224.84135

=====  
 \*\*\* End of Report \*\*\*

Data File D:\LC\LTL\DATA\LTL-5-23\LTL-5-20-23-XZY 2010-04-13 11-20-17\SIG1000006.D  
Sample Name: LTL-5-22

```
=====
Acq. Operator   : LTL                      Seq. Line :    6
Acq. Instrument : Instrument 1              Location  : Vial 6
Injection Date  : 4/13/2010 1:09:13 PM     Inj       :    1
                                           Inj Volume: 5 µl
Acq. Method     : D:\LC\LTL\data\LTL-5-23\LTL-5-20-23-XZY 2010-04-13 11-20-17\ASH-10-90-
10ML-220NM-20MIN.M
Last changed    : 3/31/2010 4:54:37 PM by LTL
Analysis Method : D:\LC\LTL\DATA\LTL-5-23\LTL-5-20-23-XZY 2010-04-13 11-20-17\SIG1000006.D\
D.M (ASH-10-90-10ML-220NM-20MIN.M)
Last changed    : 4/24/2010 9:15:05 AM by LTL
                 (modified after loading)
=====
```

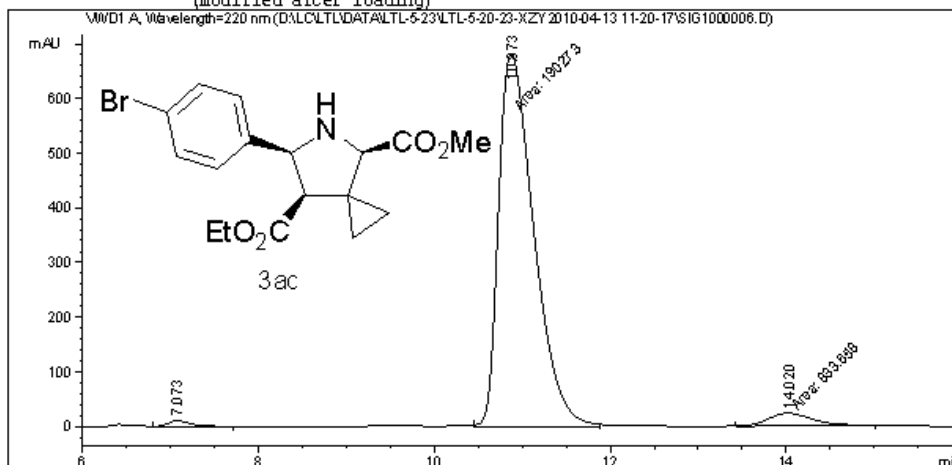

=====  
Area Percent Report  
=====

Sorted By : Signal  
Multiplier : 1.0000  
Dilution : 1.0000  
Use Multiplier & Dilution Factor with ISTDs

Signal 1: WVD1 A, Wavelength=220 nm

| Peak # | RetTime [min] | Type | Width [min] | Area mAU  | Height [mAU] | Area %  |
|--------|---------------|------|-------------|-----------|--------------|---------|
| 1      | 7.073         | VE   | 0.2572      | 180.70602 | 10.51890     | 0.9017  |
| 2      | 10.873        | MM   | 0.4636      | 1.90273e4 | 683.97577    | 94.9387 |
| 3      | 14.020        | MM   | 0.5959      | 833.65845 | 23.31755     | 4.1596  |

Totals : 2.00417e4 717.81222

=====  
\*\*\* End of Report \*\*\*  
=====

Data File D:\LC\LTL\DATA\LTL-5-23\LTL-5-20-23-XZY 2010-04-13 11-20-17\SIG1000004.D  
 Sample Name: LTL-5-21A

```

=====
Acq. Operator   : LTL                               Seq. Line :    4
Acq. Instrument : Instrument 1                       Location  : Vial 4
Injection Date  : 4/13/2010 12:26:01 PM             Inj       :    1
                                                    Inj Volume: 5 µl
Acq. Method     : D:\LC\LTL\data\LTL-5-23\LTL-5-20-23-XZY 2010-04-13 11-20-17\ASH-10-90-
                10ML-220NM-20MIN.M
Last changed    : 3/31/2010 4:54:37 PM by LTL
Analysis Method : D:\LC\LTL\DATA\LTL-5-23\LTL-5-20-23-XZY 2010-04-13 11-20-17\SIG1000004.D\
                DA.M (ASH-10-90-10ML-220NM-20MIN.M)
Last changed    : 4/13/2010 9:08:43 PM by LTL
                (modified after loading)
    
```

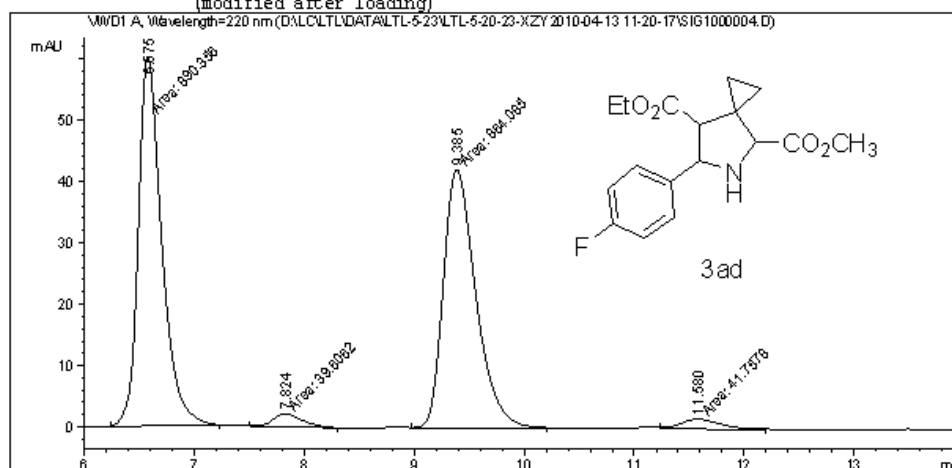

Area Percent Report

```

Sorted By      :      Signal
Multiplier     :      1.0000
Dilution       :      1.0000
Use Multiplier & Dilution Factor with ISTDs
    
```

Signal 1: VWD1 A, Wavelength=220 nm

| Peak # | RetTime [min] | Type | Width [min] | Area mAU *s | Height [mAU] | Area %  |
|--------|---------------|------|-------------|-------------|--------------|---------|
| 1      | 6.575         | MM   | 0.2465      | 890.35608   | 60.20549     | 48.4995 |
| 2      | 7.824         | MM   | 0.3099      | 39.60619    | 2.13029      | 2.1574  |
| 3      | 9.385         | MM   | 0.3421      | 864.08478   | 42.09634     | 47.0684 |
| 4      | 11.580        | MM   | 0.4273      | 41.75775    | 1.62868      | 2.2746  |

Totals : 1835.80480 106.06081

\*\*\* End of Report \*\*\*

数据文件: C:\1000526\2\LC\LTL\DATA\LTL-5-31\LTL-5-31 2010-04-16 19-22-27\SIG1000001.D  
样品名称: LTL-5-31A

```

=====
操作者       : LTL                      序列行 : 1
仪器         : Instrument 1              位置   : 样品瓶 43
进样日期     : 2010-4-17 10:24:00 上午  进样次数: 1
                                           进样量 : 5 µl
采集方法     : D:\LC\LTL\data\LTL-5-31\LTL-5-31 2010-04-16 19-22-27\ASH-10-90-10ML-
                                           220NM-20MIN.M
最后修改     : 2010-4-1 8:54:37 上午 : LTL
分析方法     : C:\1000526\2\LC\LTL\DATA\LTL-5-31\LTL-5-31 2010-04-16 19-22-27\
                                           SIG1000001.D\DA.M (ASH-10-90-10ML-220NM-20MIN.M)
最后修改     : 2010-7-24 10:28:32 上午
                                           (调用后修改)
=====
    
```

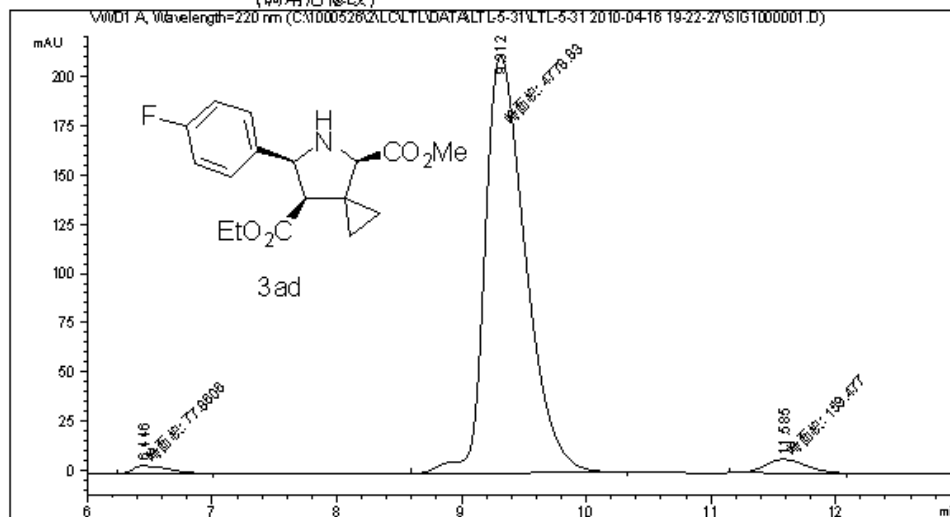

面积百分比报告

```

=====
排序       : 信号
乘积因子   : 1.0000
稀释因子   : 1.0000
内标使用乘积因子和稀释因子
    
```

信号 1: WVD1 A, Wavelength=220 nm

| 峰 # | 保留时间 [min] | 类型 | 峰宽 [min] | 峰面积 mAU *s | 峰高 [mAU]  | 峰面积 %   |
|-----|------------|----|----------|------------|-----------|---------|
| 1   | 6.446      | MM | 0.3187   | 77.86063   | 4.07179   | 1.5522  |
| 2   | 9.312      | MM | 0.3757   | 4778.83447 | 211.98970 | 95.2686 |
| 3   | 11.585     | MM | 0.3825   | 159.47664  | 6.94917   | 3.1792  |

总量 : 5016.17175 223.01067

\*\*\* 报告结束 \*\*\*

Data File D:\LC\LTL\DATA\LTL-5-23\LTL-5-20-23-XZY 2010-04-13 11-20-17\SIG1000001.D  
 Sample Name: LTL-5-23A

```

=====
Acq. Operator   : LTL                               Seq. Line :    1
Acq. Instrument : Instrument 1                       Location  : Vial 1
Injection Date  : 4/13/2010 11:21:32 AM             Inj       :    1
                                                    Inj Volume: 5 µl
Acq. Method     : D:\LC\LTL\data\LTL-5-23\LTL-5-20-23-XZY 2010-04-13 11-20-17\ASH-10-90-
                10ML-220NM-20MIN.M
Last changed    : 3/31/2010 4:54:37 PM by LTL
Analysis Method : D:\LC\LTL\DATA\LTL-5-23\LTL-5-20-23-XZY 2010-04-13 11-20-17\SIG1000001.D\
                DA.M (ASH-10-90-10ML-220NM-20MIN.M)
Last changed    : 4/13/2010 9:01:15 PM by LTL
                (modified after loading)
    
```

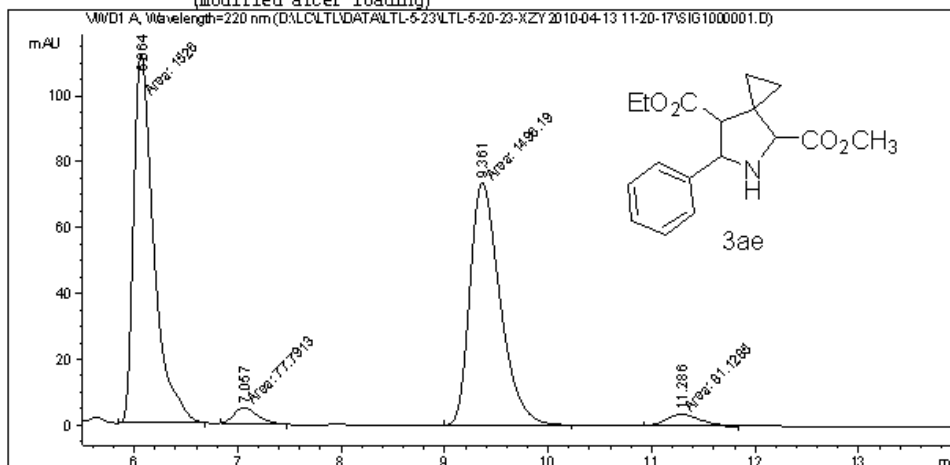

Area Percent Report

```

Sorted By      :      Signal
Multiplier     :      1.0000
Dilution       :      1.0000
Use Multiplier & Dilution Factor with ISTDs
    
```

Signal 1: VWD1 A, Wavelength=220 nm

| Peak # | RetTime [min] | Type | Width [min] | Area mAU   | Area %  | Height [mAU] |
|--------|---------------|------|-------------|------------|---------|--------------|
| 1      | 6.064         | MM   | 0.2265      | 1525.99890 | 47.9707 | 112.28498    |
| 2      | 7.057         | MM   | 0.2611      | 77.79130   | 2.4454  | 4.96639      |
| 3      | 9.361         | MM   | 0.3387      | 1496.19031 | 47.0336 | 73.62195     |
| 4      | 11.286        | MM   | 0.3822      | 81.12847   | 2.5503  | 3.53753      |

Totals : 3181.10898 194.41085

\*\*\* End of Report \*\*\*

Data File D:\LC\LTL\DATA\LTL-5-23\LTL-5-20-23-XZY 2010-04-13 11-20-17\SIG1000002.D  
Sample Name: LTL-5-23B

```

=====
Acq. Operator   : LTL                               Seq. Line :    2
Acq. Instrument : Instrument 1                       Location  : Vial 2
Injection Date  : 4/13/2010 11:43:10 AM             Inj       :    1
                                                    Inj Volume: 5 µl
Acq. Method     : D:\LC\LTL\data\LTL-5-23\LTL-5-20-23-XZY 2010-04-13 11-20-17\ASH-10-90-
                10ML-220NM-20MIN.M
Last changed    : 3/31/2010 4:54:37 PM by LTL
Analysis Method : D:\LC\LTL\DATA\LTL-5-23\LTL-5-20-23-XZY 2010-04-13 11-20-17\SIG1000002.D\
                D\M (ASH-10-90-10ML-220NM-20MIN.M)
Last changed    : 4/13/2010 9:03:22 PM by LTL
                (modified after loading)
    
```

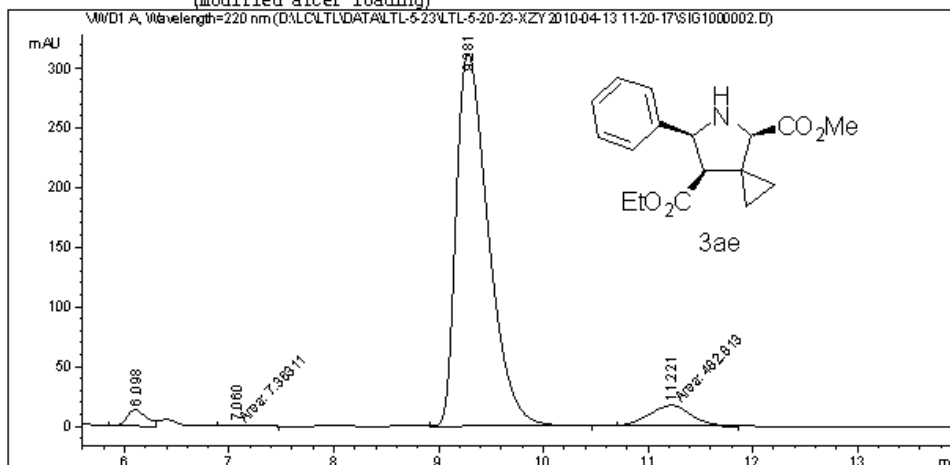

=====  
Area Percent Report  
=====

```

Sorted By      :      Signal
Multiplier     :      1.0000
Dilution       :      1.0000
Use Multiplier & Dilution Factor with ISTDs
    
```

Signal 1: WVD1 A, Wavelength=220 nm

| Peak # | RetTime [min] | Type | Width [min] | Area mAU   | Area *s    | Height [mAU] | Area % |
|--------|---------------|------|-------------|------------|------------|--------------|--------|
| 1      | 6.098         | VV   | 0.1954      | 174.70584  | 13.69851   | 2.3876       |        |
| 2      | 7.060         | MM   | 0.2400      | 7.36311    | 5.11364e-1 | 0.1006       |        |
| 3      | 9.281         | VE   | 0.3286      | 6652.47070 | 312.32367  | 90.9136      |        |
| 4      | 11.221        | MM   | 0.4672      | 482.81299  | 17.22181   | 6.5982       |        |

Totals :                                 7317.35264   343.75536

=====  
\*\*\* End of Report \*\*\*

Data File D:\LC\LTL\DATA\LTL-5-20\LTL-5-20 2010-04-12 16-12-37\SIG1000002.D  
 Sample Name: LTL-5-20A

```

=====
Acq. Operator   : LTL                      Seq. Line :    2
Acq. Instrument : Instrument 1              Location  : Vial 51
Injection Date  : 4/12/2010 4:25:00 PM     Inj       :    1
                                           Inj Volume: 5 µl
Acq. Method     : D:\LC\LTL\data\LTL-5-20\LTL-5-20 2010-04-12 16-12-37\ASH-10-90-10ML-220NM-
20MIN.M
Last changed    : 3/31/2010 4:54:37 PM by LTL
Analysis Method : D:\LC\LTL\DATA\LTL-5-20\LTL-5-20 2010-04-12 16-12-37\SIG1000002.D\DA.M (
ASH-10-90-10ML-220NM-20MIN.M)
Last changed    : 4/13/2010 9:04:58 PM by LTL
(modified after loading)
    
```

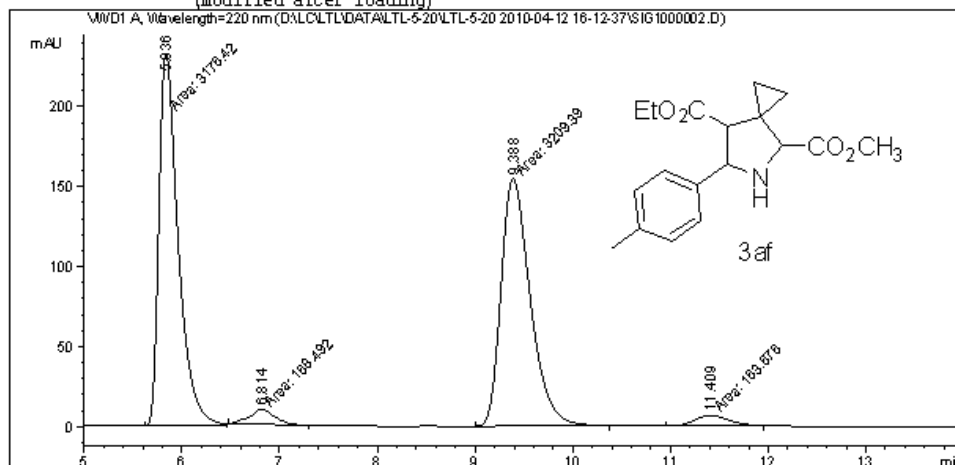

Area Percent Report

```

Sorted By      : Signal
Multiplier     : 1.0000
Dilution       : 1.0000
Use Multiplier & Dilution Factor with ISTDs
    
```

Signal 1: VMD1 A, Wavelength=220 nm

| Peak # | RetTime [min] | Type | Width [min] | Area mAU   | Area %  | Height [mAU] |
|--------|---------------|------|-------------|------------|---------|--------------|
| 1      | 5.836         | MM   | 0.2274      | 3176.42310 | 47.2824 | 232.76852    |
| 2      | 6.814         | MM   | 0.3047      | 168.49199  | 2.5081  | 9.21537      |
| 3      | 9.388         | MM   | 0.3463      | 3209.38770 | 47.7731 | 154.45337    |
| 4      | 11.409        | MM   | 0.4078      | 163.67644  | 2.4364  | 6.68915      |

Totals : 6717.97922 403.12641

\*\*\* End of Report \*\*\*



数据文件: C:\1000526\2\LC\LTL\DATA\LTL-5-30\LTL-5-30 2010-04-16 18-21-40\SIG1000002.D  
样品名称: LTL-5-30A

```

=====
操作者       : LTL                      序列行 : 2
仪器        : Instrument 1              位置   : 样品瓶 41
进样日期    : 2010-4-17 9:34:01 上午   进样次数 : 1
                                           进样量 : 5 µl
采集方法    : D:\LC\LTL\data\LTL-5-30\LTL-5-30 2010-04-16 18-21-40\ASH-10-90-10ML-
                                           220NM-20MIN.M
最后修改    : 2010-4-1 8:54:37 上午 : LTL
分析方法    : C:\1000526\2\LC\LTL\DATA\LTL-5-30\LTL-5-30 2010-04-16 18-21-40\
                                           SIG1000002.D\DA.M (ASH-10-90-10ML-220NM-20MIN.M)
最后修改    : 2010-7-24 10:22:17 上午
                                           (调用后修改)
=====
    
```

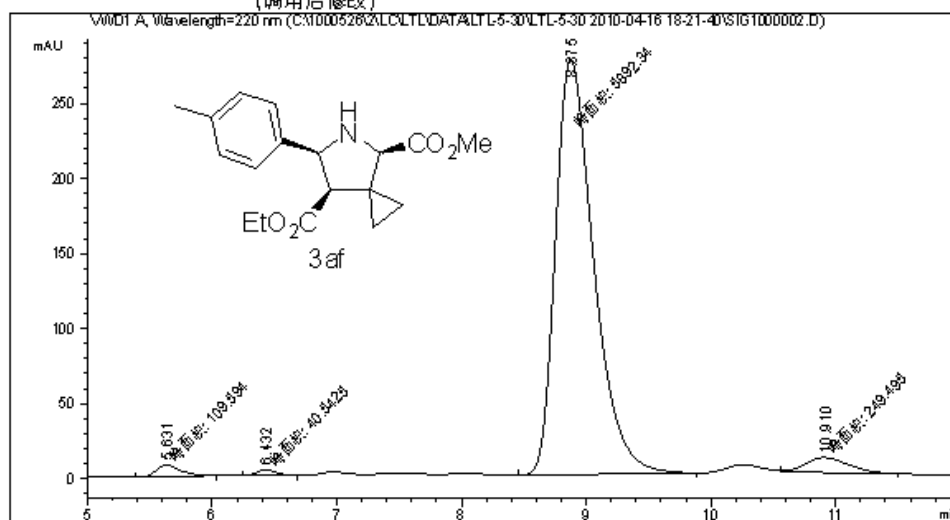

面积百分比报告

```

=====
排序       : 信号
乘积因子   : 1.0000
稀释因子   : 1.0000
内标使用乘积因子和稀释因子
    
```

信号 1: WVD1 A, Wavelength=220 nm

| 峰 # | 保留时间 [min] | 类型 | 峰宽 [min] | 峰面积 mAU *s | 峰高 [mAU]  | 峰面积 %   |
|-----|------------|----|----------|------------|-----------|---------|
| 1   | 5.631      | MM | 0.2327   | 109.59352  | 7.84948   | 1.7418  |
| 2   | 6.432      | MM | 0.1748   | 40.54253   | 3.86616   | 0.6444  |
| 3   | 8.875      | MM | 0.3549   | 5892.34473 | 276.70813 | 93.6486 |
| 4   | 10.910     | MM | 0.4124   | 249.49547  | 10.08218  | 3.9653  |

总量 : 6291.97625 298.50595

\*\*\* 报告结束 \*\*\*

Data File D:\LC\LTL\DATA\LTL-5-35\LTL-5-35A 2010-04-17 17-23-26\SIG1000001.D  
 Sample Name: LTL-5-35A

```

=====
Acq. Operator   : LTL                               Seq. Line :    1
Acq. Instrument : Instrument 1                       Location  : Vial 66
Injection Date  : 4/17/2010 5:24:58 PM             Inj       :    1
                                                    Inj Volume: 5 µl
Acq. Method    : D:\LC\LTL\data\LTL-5-35\LTL-5-35A 2010-04-17 17-23-26\ASH-10-90-10ML-
                220NM-60MIN.M
Last changed   : 11/15/2009 6:41:50 PM by DXQ
Analysis Method : D:\LC\LTL\DATA\LTL-5-35\LTL-5-35A 2010-04-17 17-23-26\SIG1000001.D\DA.M (
                ASH-10-90-10ML-220NM-60MIN.M)
Last changed   : 4/17/2010 5:49:12 PM by LTL
                (modified after loading)
    
```

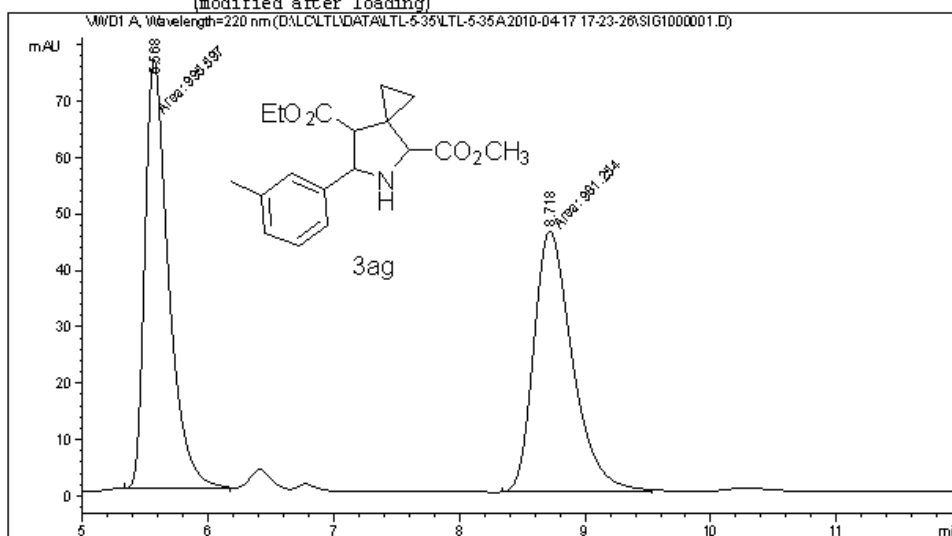

Area Percent Report

```

=====
Sorted By      :      Signal
Multiplier     :      1.0000
Dilution       :      1.0000
Use Multiplier & Dilution Factor with ISTDs
    
```

Signal 1: WVD1 A, Wavelength=220 nm

| Peak # | RetTime [min] | Type | Width [min] | Area mAU  | Height [mAU] | Area %  |
|--------|---------------|------|-------------|-----------|--------------|---------|
| 1      | 5.568         | MM   | 0.2181      | 995.59680 | 76.07470     | 50.3628 |
| 2      | 8.718         | MM   | 0.3545      | 981.25439 | 46.13061     | 49.6372 |

Totals : 1976.85120 122.20531

Data File D:\LC\LTL\DATA\LTL-5-34-35B\LTL-5-34-35B 2010-04-19 16-07-43\SIG1000003.D  
 Sample Name: LTL-5-35B

```

=====
Acq. Operator   : LTL                               Seq. Line :    3
Acq. Instrument : Instrument 1                       Location  : Vial 72
Injection Date  : 4/19/2010 4:41:29 PM             Inj       :    1
                                                    Inj Volume: 5 µl
Acq. Method     : D:\LC\LTL\data\LTL-5-34-35B\LTL-5-34-35B 2010-04-19 16-07-43\ASH-10-90-
10ML-220NM-20MIN.M
Last changed    : 3/31/2010 4:54:37 PM by LTL
Analysis Method : D:\LC\LTL\DATA\LTL-5-34-35B\LTL-5-34-35B 2010-04-19 16-07-43\SIG1000003.D\
D.A.M (ASH-10-90-10ML-220NM-20MIN.M)
Last changed    : 4/19/2010 5:19:06 PM by LTL
(modified after loading)
    
```

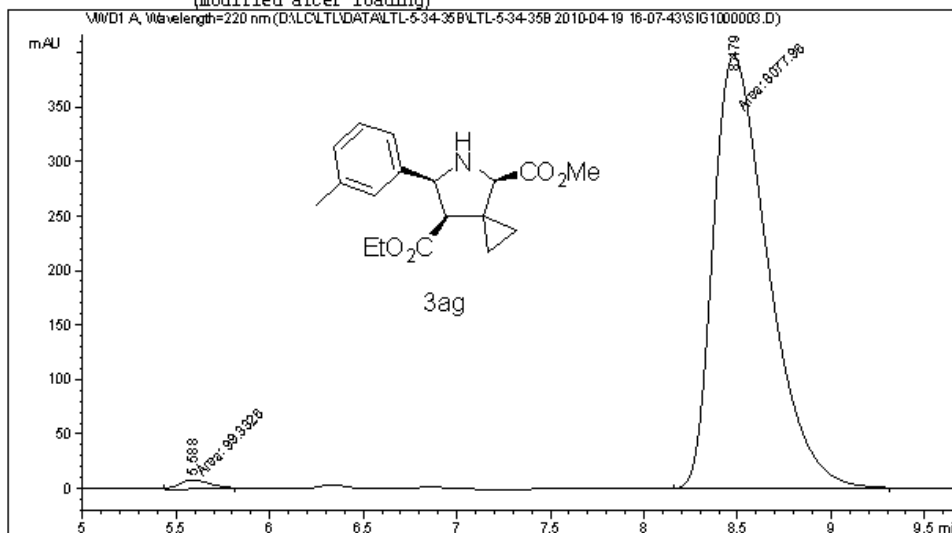

Area Percent Report

```

=====
Sorted By      :      Signal
Multiplier     :      1.0000
Dilution       :      1.0000
Use Multiplier & Dilution Factor with ISTDs
    
```

Signal 1: WMD1 A, Wavelength=220 nm

| Peak # | RetTime [min] | Type | Width [min] | Area mAU   | Height [mAU] | Area %  |
|--------|---------------|------|-------------|------------|--------------|---------|
| 1      | 5.588         | MM   | 0.1947      | 99.33256   | 8.50452      | 1.2147  |
| 2      | 8.479         | MM   | 0.3395      | 8077.96289 | 396.52243    | 98.7853 |

Totals : 8177.29545 405.02695



Data File D:\LC\LTL\DATA\LTL-5-34-35B\LTL-5-34-35B 2010-04-19 16-07-43\SIG1000002.D  
Sample Name: LTL-5-34B

```
=====
Acq. Operator   : LTL                               Seq. Line :    2
Acq. Instrument : Instrument 1                       Location  : Vial 71
Injection Date  : 4/19/2010 4:20:03 PM              Inj       :    1
                                                    Inj Volume: 5 µl
Acq. Method     : D:\LC\LTL\data\LTL-5-34-35B\LTL-5-34-35B 2010-04-19 16-07-43\ASH-10-90-
                10ML-220NM-20MIN.M
Last changed    : 3/31/2010 4:54:37 PM by LTL
Analysis Method : D:\LC\LTL\DATA\LTL-5-34-35B\LTL-5-34-35B 2010-04-19 16-07-43\SIG1000002.D\
                DA.M (ASH-10-90-10ML-220NM-20MIN.M)
Last changed    : 4/19/2010 5:15:53 PM by LTL
                (modified after loading)
=====
```

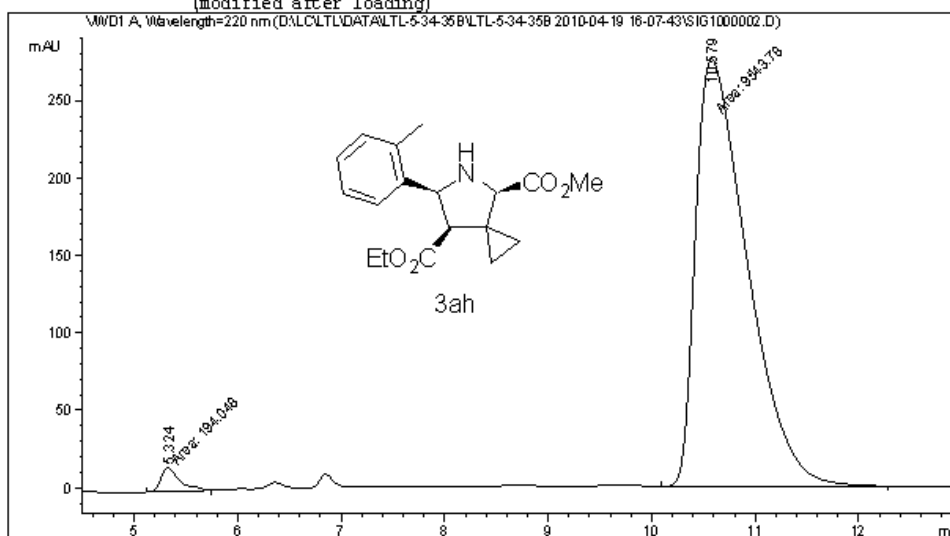

Area Percent Report

```
Sorted By      : Signal
Multiplier     : 1.0000
Dilution       : 1.0000
Use Multiplier & Dilution Factor with ISTDs
```

Signal 1: WVD1 A, Wavelength=220 nm

| Peak # | RetTime [min] | Type | Width [min] | Area mAU *s | Height [mAU] | Area %  |
|--------|---------------|------|-------------|-------------|--------------|---------|
| 1      | 5.324         | MM   | 0.2137      | 194.04799   | 15.13305     | 1.9927  |
| 2      | 10.579        | MM   | 0.5770      | 9543.77930  | 275.69281    | 98.0073 |

Totals : 9737.82729 290.82586

Instrument 1 4/19/2010 5:15:57 PM LTL

Page 1 of 1



数据文件: C:\1000526\2\LC\LTL\DATA\LTL-5-30\LTL-5-30 2010-04-16 18-21-40\SIG1000003.D  
样品名称: LTL-5-30B

```

=====
操作者       : LTL                      序列行 : 3
仪器         : Instrument 1              位置   : 样品瓶 42
进样日期     : 2010-4-17 9:55:36 上午   进样次数 : 1
                                           进样量 : 5 µl
采集方法     : D:\LC\LTL\data\LTL-5-30\LTL-5-30 2010-04-16 18-21-40\ASH-10-90-10ML-
                                           220NM-20MIN.M
最后修改     : 2010-4-1 8:54:37 上午 : LTL
分析方法     : C:\1000526\2\LC\LTL\DATA\LTL-5-30\LTL-5-30 2010-04-16 18-21-40\
                                           SIG1000003.D\DA.M (ASH-10-90-10ML-220NM-20MIN.M)
最后修改     : 2010-7-24 10:25:46 上午
                                           (调用后修改)
=====
    
```

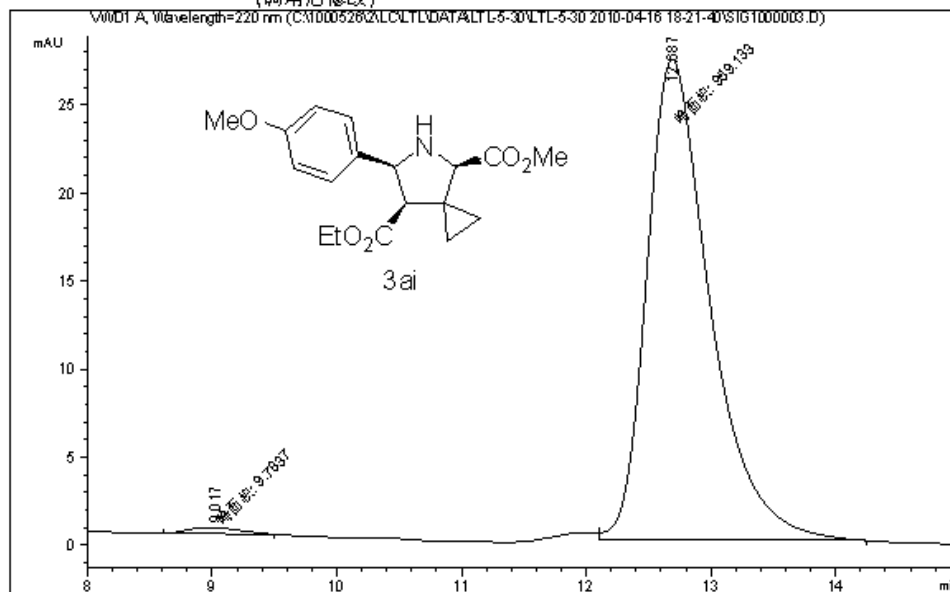

=====  
面积百分比报告  
=====

```

排序       : 信号
乘积因子   : 1.0000
稀释因子   : 1.0000
内标使用乘积因子和稀释因子
    
```

信号 1: WVD1 A, Wavelength=220 nm

| 峰 # | 保留时间 [min] | 类型 | 峰宽 [min] | 峰面积 mAU *s | 峰高 [mAU]   | 峰面积 %   |
|-----|------------|----|----------|------------|------------|---------|
| 1   | 9.017      | MM | 0.5045   | 9.78370    | 3.23239e-1 | 1.0098  |
| 2   | 12.687     | MM | 0.5857   | 959.13269  | 27.29437   | 98.9902 |

总量 : 968.91639 27.61761

=====  
\*\*\* 报告结束 \*\*\*





Data File D:\LC\LTL\DATA\LTL-6-21\LTL-6-24 2010-06-09 16-35-54\SIG1000002.D  
Sample Name: LTL-6-24

```
=====
Acq. Operator   : LTL                               Seq. Line :    2
Acq. Instrument : Instrument 1                       Location  : Vial 43
Injection Date  : 6/9/2010 4:48:19 PM              Inj       :    1
                                                    Inj Volume: 5 µl
Acq. Method     : D:\LC\LTL\data\LTL-6-21\LTL-6-24 2010-06-09 16-35-54\ASH-10-90-10ML-220NM-
20MIN.M
Last changed    : 3/31/2010 4:54:37 PM by LTL
Analysis Method : D:\LC\LTL\DATA\LTL-6-21\LTL-6-24 2010-06-09 16-35-54\SIG1000002.D\DA.M (
ASH-10-90-10ML-220NM-20MIN.M)
Last changed    : 6/9/2010 5:09:46 PM by LTL
(modified after loading)
=====
```

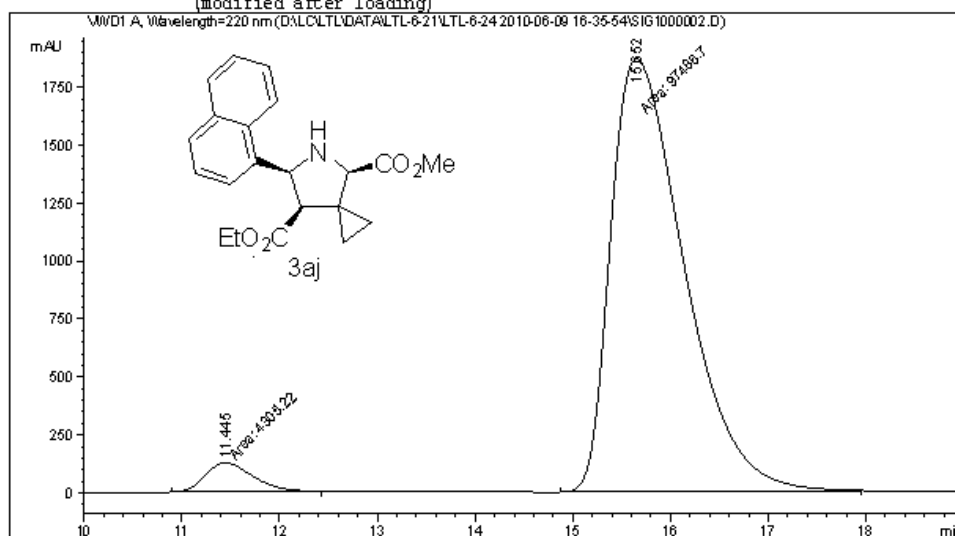

=====  
Area Percent Report  
=====

```
Sorted By      :      Signal
Multiplier     :      1.0000
Dilution       :      1.0000
Use Multiplier & Dilution Factor with ISTDs
```

Signal 1: VMD1 A, Wavelength=220 nm

| Peak # | RetTime [min] | Type | Width [min] | Area mAU   | Area *s    | Height [mAU] | Area % |
|--------|---------------|------|-------------|------------|------------|--------------|--------|
| 1      | 11.445        | MM   | 0.5668      | 4305.21631 | 126.59375  | 4.2294       |        |
| 2      | 15.652        | MM   | 0.8702      | 9.74867e4  | 1867.12585 | 95.7706      |        |

Totals :                      1.01792e5    1993.71960

Instrument 1 6/9/2010 5:09:50 PM LTL

Page 1 of 1

Data File D:\LC\LTL\DATA\LTL-6-25\LTL-6-25 2010-06-09 19-34-35\SIG1000002.D  
 Sample Name: LTL-6-25

```

=====
Acq. Operator   : LTL                               Seq. Line :    2
Acq. Instrument : Instrument 1                       Location  : Vial 44
Injection Date  : 6/9/2010 7:47:00 PM              Inj       :    1
                                                    Inj Volume: 5 µl
Acq. Method     : D:\LC\LTL\data\LTL-6-25\LTL-6-25 2010-06-09 19-34-35\ASH-5-95-10ML-220NM-
60MIN.M
Last changed    : 6/9/2010 8:05:19 PM by LTL
(modified after loading)
Analysis Method : D:\LC\LTL\DATA\LTL-6-25\LTL-6-25 2010-06-09 19-34-35\SIG1000002.D\DA.M (
ASH-5-95-10ML-220NM-60MIN.M)
Last changed    : 6/9/2010 8:08:42 PM by LTL
(modified after loading)
    
```

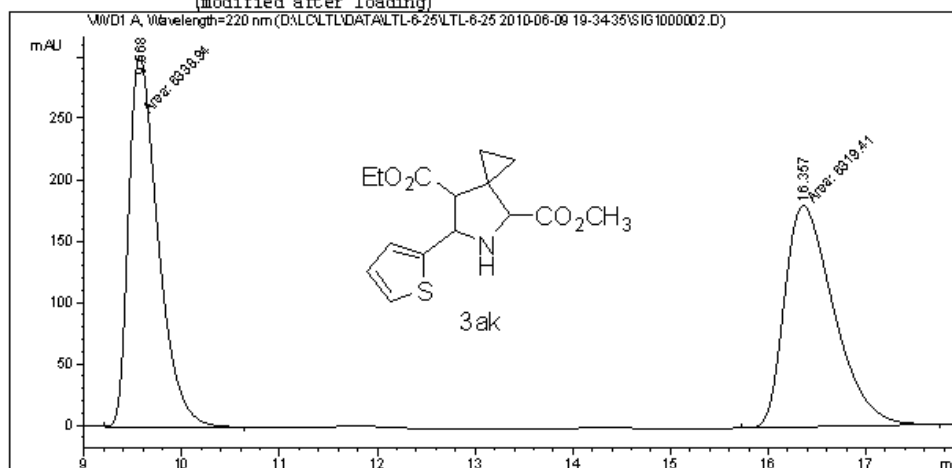

=====  
 Area Percent Report  
 =====

```

Sorted By      :      Signal
Multiplier     :      1.0000
Dilution      :      1.0000
Use Multiplier & Dilution Factor with ISTDs
    
```

Signal 1: VWD1 A, Wavelength=220 nm

| Peak # | RetTime [min] | Type | Width [min] | Area mAU   | Height [mAU] | Area %  |
|--------|---------------|------|-------------|------------|--------------|---------|
| 1      | 9.568         | MM   | 0.3494      | 6338.94092 | 302.37076    | 50.0772 |
| 2      | 16.357        | MM   | 0.5855      | 6319.40674 | 179.87982    | 49.9228 |

Totals :                    1.26583e4    482.25058

=====  
 \*\*\* End of Report \*\*\*

Data File D:\LC\LTL\DATA\LTL-6-30\LTL-6-30A-1 2010-06-14 11-03-07\SIG1000002.D  
 Sample Name: LTL-6-30A-1

```

=====
Acq. Operator   : LTL                               Seq. Line :    2
Acq. Instrument : Instrument 1                       Location  : Vial 64
Injection Date  : 6/14/2010 11:15:35 AM            Inj       :    1
                                                    Inj Volume: 5 µl
Acq. Method     : D:\LC\LTL\data\LTL-6-30\LTL-6-30A-1 2010-06-14 11-03-07\ASH-10-90-10ML-
                220NM-20MIN.M
Last changed    : 3/31/2010 4:54:37 PM by LTL
Analysis Method : D:\LC\LTL\DATA\LTL-6-30\LTL-6-30A-1 2010-06-14 11-03-07\SIG1000002.D\DA.M
                (ASH-10-90-10ML-220NM-20MIN.M)
Last changed    : 6/14/2010 11:37:14 AM by LTL
                (modified after loading)
    
```

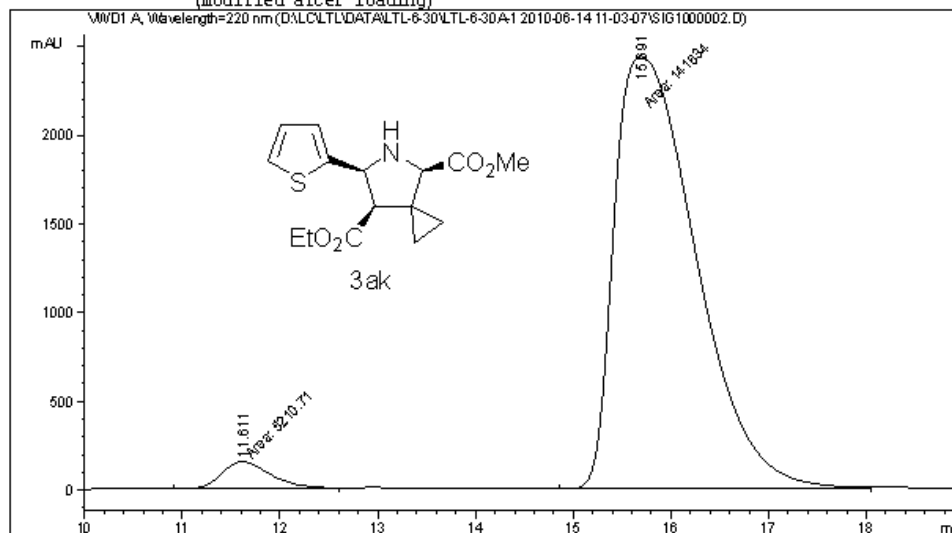

=====  
 Area Percent Report  
 =====

```

Sorted By      :      Signal
Multiplier     :      1.0000
Dilution       :      1.0000
Use Multiplier & Dilution Factor with ISTDs
    
```

Signal 1: WVD1 A, Wavelength=220 nm

| Peak # | RetTime [min] | Type | Width [min] | Area mAU   | Height [mAU] | Area %  |
|--------|---------------|------|-------------|------------|--------------|---------|
| 1      | 11.611        | MM   | 0.5741      | 5210.70508 | 151.27429    | 3.5484  |
| 2      | 15.691        | MF   | 0.9677      | 1.41634e5  | 2439.41235   | 96.4516 |

Totals :                      1.46845e5    2590.68665

Data File D:\LC\LTL\DATA\LTL-5-51\LTL-5-51A 2010-04-29 09-52-13\SIG1000002.D  
Sample Name: LTL-5-51A

```
=====
Acq. Operator   : LTL                               Seq. Line :    2
Acq. Instrument : Instrument 1                       Location  : Vial 84
Injection Date  : 4/29/2010 10:04:35 AM             Inj       :    1
                                                    Inj Volume: 5 µl
Acq. Method     : D:\LC\LTL\data\LTL-5-51\LTL-5-51A 2010-04-29 09-52-13\ASH-10-90-10ML-
                220NM-60MIN.M
Last changed    : 11/15/2009 6:41:50 PM by DXQ
Analysis Method : D:\LC\LTL\DATA\LTL-5-51\LTL-5-51A 2010-04-29 09-52-13\SIG1000002.D\A.M (
                ASH-10-90-10ML-220NM-60MIN.M)
Last changed    : 5/25/2010 8:09:43 PM by thl
                (modified after loading)
=====
```

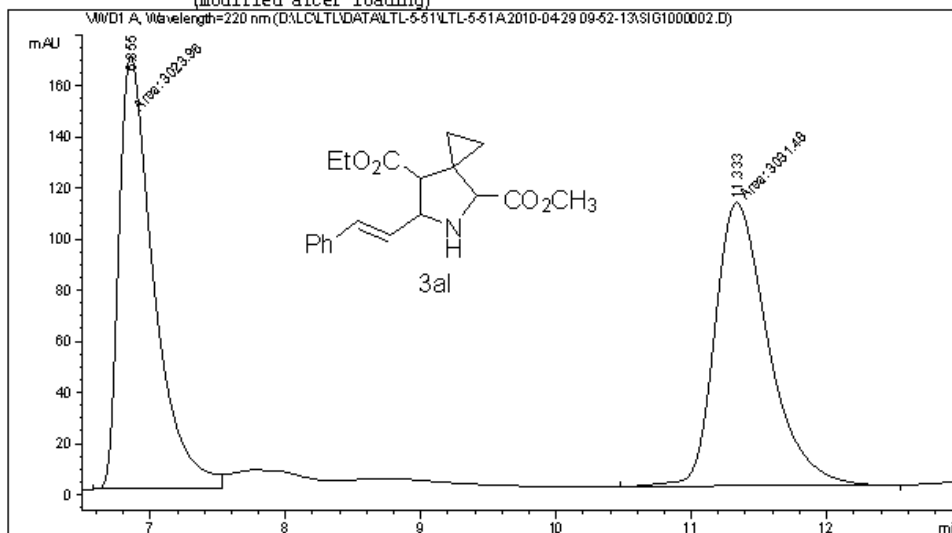

=====  
Area Percent Report  
=====

```
Sorted By      :      Signal
Multiplier     :      1.0000
Dilution       :      1.0000
Use Multiplier & Dilution Factor with ISTDs
```

Signal 1: WMD1 A, Wavelength=220 nm

| Peak # | RetTime [min] | Type | Width [min] | Area mAU *s | Height [mAU] | Area %  |
|--------|---------------|------|-------------|-------------|--------------|---------|
| 1      | 6.855         | MF   | 0.2975      | 3023.96216  | 169.41603    | 49.9379 |
| 2      | 11.333        | NM   | 0.4558      | 3031.48486  | 110.84300    | 50.0621 |

Totals :                   6055.44702   280.25903

Instrument 1 5/25/2010 8:09:47 PM thl

Page 1 of 1





Data File D:\LC\LTL\DATA\LTL-5-43-44\LTL-5-43-44 2010-04-27 08-40-08\SIG1000005.D  
 Sample Name: LTL-5-44B

```

=====
Acq. Operator   : LTL                               Seq. Line :    5
Acq. Instrument : Instrument 1                       Location  : Vial 97
Injection Date  : 4/27/2010 9:57:04 AM             Inj       :    1
                                                    Inj Volume: 5 µl
Acq. Method     : D:\LC\LTL\data\LTL-5-43-44\LTL-5-43-44 2010-04-27 08-40-08\ADH-5-95-10ML-
                220NM-20MIN.M
Last changed    : 4/27/2010 8:37:49 AM by LTL
Analysis Method : D:\LC\LTL\DATA\LTL-5-43-44\LTL-5-43-44 2010-04-27 08-40-08\SIG1000005.D\
                DA.M (ADH-5-95-10ML-220NM-20MIN.M)
Last changed    : 5/4/2010 8:43:45 PM by TMC
                (modified after loading)
    
```

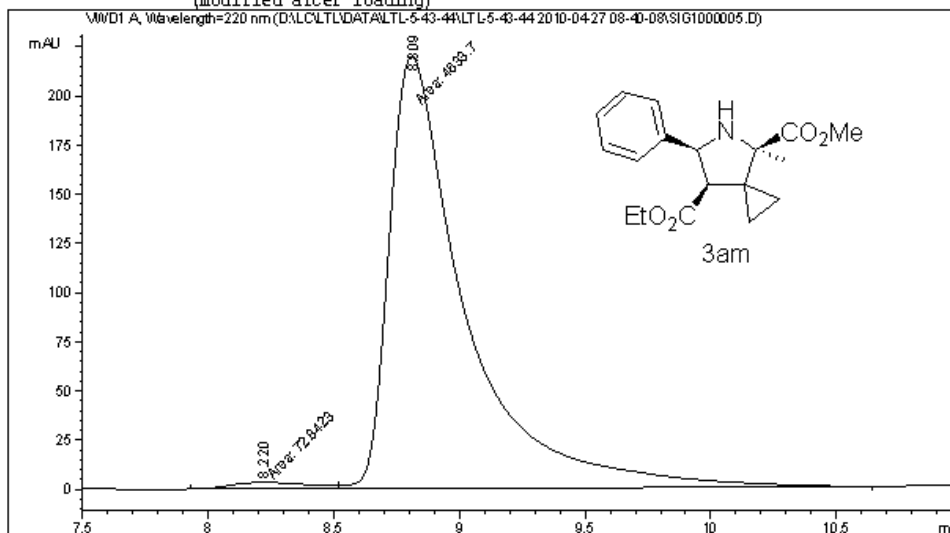

Area Percent Report

```

=====
Sorted By      : Signal
Multiplier     : 1.0000
Dilution       : 1.0000
Use Multiplier & Dilution Factor with ISTDs
    
```

Signal 1: WMD1 A, Wavelength=220 nm

| Peak # | RetTime [min] | Type | Width [min] | Area mAU   | Height [mAU] | Area %  |
|--------|---------------|------|-------------|------------|--------------|---------|
| 1      | 8.220         | MF   | 0.3677      | 72.84235   | 3.30209      | 1.5477  |
| 2      | 8.809         | FM   | 0.3513      | 4633.69922 | 219.85823    | 98.4523 |

Totals : 4706.54156 223.16032

Instrument 1 5/4/2010 8:43:59 PM TMC

Page 1 of 1

Data File D:\LC\LTL\DATA\LTL-5-38\LTL-5-39 2010-04-21 16-53-56\SIG1000002.D  
Sample Name: LTL-5-38A

```

=====
Acq. Operator   : LTL                               Seq. Line :    2
Acq. Instrument : Instrument 1                       Location  : Vial 67
Injection Date  : 4/21/2010 5:06:40 PM             Inj       :    1
                                                    Inj Volume: 5 µl
Acq. Method     : D:\LC\LTL\data\LTL-5-38\LTL-5-39 2010-04-21 16-53-56\ADH-5-95-10ML-220NM-
30MIN.M
Last changed    : 4/21/2010 4:53:23 PM by LTL
Analysis Method : D:\LC\LTL\DATA\LTL-5-38\LTL-5-39 2010-04-21 16-53-56\SIG1000002.D\DA.M (
ADH-5-95-10ML-220NM-30MIN.M)
Last changed    : 4/21/2010 6:58:01 PM by LTL
(modified after loading)
    
```

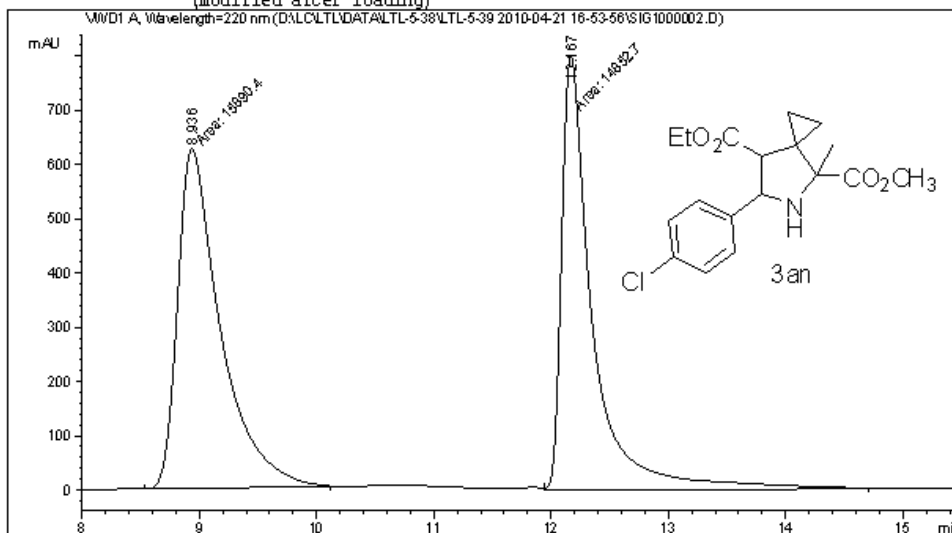

=====  
Area Percent Report  
=====

```

Sorted By      :      Signal
Multiplier     :      1.0000
Dilution       :      1.0000
Use Multiplier & Dilution Factor with ISTDs
    
```

Signal 1: VMD1 A, Wavelength=220 nm

| Peak # | RetTime [min] | Type | Width [min] | Area mAU  | Area *s   | Height [mAU] | Area % |
|--------|---------------|------|-------------|-----------|-----------|--------------|--------|
| 1      | 8.936         | MM   | 0.4228      | 1.58904e4 | 626.41632 | 51.6876      |        |
| 2      | 12.167        | MM   | 0.3089      | 1.48527e4 | 801.25385 | 48.3124      |        |

Totals :                    3.07431e4  1427.67017

Instrument 1 4/21/2010 6:58:06 PM LTL

Page 1 of 1



Data File D:\LC\LTL\DATA\LTL-5-38\LTL-5-39 2010-04-21 16-53-56\SIG1000003.D  
Sample Name: LTL-5-39

```
=====
Acq. Operator   : LTL                               Seq. Line :    3
Acq. Instrument : Instrument 1                       Location  : Vial 69
Injection Date  : 4/21/2010 5:38:00 PM             Inj       :    1
                                                    Inj Volume: 5 µl
Acq. Method     : D:\LC\LTL\data\LTL-5-38\LTL-5-39 2010-04-21 16-53-56\ADH-5-95-10ML-220NM-
30MIN.M
Last changed    : 4/21/2010 4:53:23 PM by LTL
Analysis Method : D:\LC\LTL\DATA\LTL-5-38\LTL-5-39 2010-04-21 16-53-56\SIG1000003.D\DA.M (
ADH-5-95-10ML-220NM-30MIN.M)
Last changed    : 4/21/2010 6:55:47 PM by LTL
(modified after loading)
=====
```

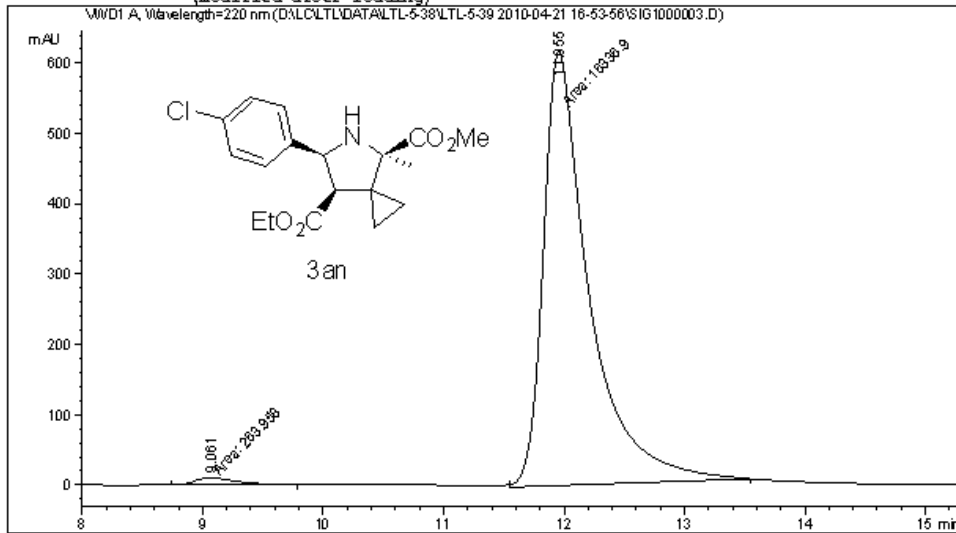

=====  
Area Percent Report  
=====

Sorted By : Signal  
Multiplier : 1.0000  
Dilution : 1.0000  
Use Multiplier & Dilution Factor with ISTDs

Signal 1: VMD1 A, Wavelength=220 nm

| Peak #   | RetTime [min] | Type | Width [min] | Area mAU  | Height [mAU] | Area %  |
|----------|---------------|------|-------------|-----------|--------------|---------|
| 1        | 9.061         | MM   | 0.4165      | 263.95801 | 10.56129     | 1.5900  |
| 2        | 11.955        | MM   | 0.4414      | 1.63369e4 | 616.88617    | 98.4100 |
| Totals : |               |      |             | 1.66008e4 | 627.44746    |         |

Instrument 1 4/21/2010 6:56:07 PM LTL

Page 1 of 1

Data File D:\LC\LTL\DATA\LTL-5-43-44\LTL-5-43-44 2010-04-27 08-40-08\SIG1000004.D  
 Sample Name: LTL-5-44A

```

=====
Acq. Operator   : LTL                      Seq. Line :    4
Acq. Instrument : Instrument 1              Location  : Vial 95
Injection Date  : 4/27/2010 9:35:39 AM     Inj       :    1
                                           Inj Volume: 5 µl
Acq. Method    : D:\LC\LTL\data\LTL-5-43-44\LTL-5-43-44 2010-04-27 08-40-08\ADH-5-95-10ML-
                220NM-20MIN.M
Last changed   : 4/27/2010 8:37:49 AM by LTL
Analysis Method: D:\LC\LTL\DATA\LTL-5-43-44\LTL-5-43-44 2010-04-27 08-40-08\SIG1000004.D\
                DA.M (ADH-5-95-10ML-220NM-20MIN.M)
Last changed   : 5/4/2010 8:45:11 PM by TMC
                (modified after loading)
    
```

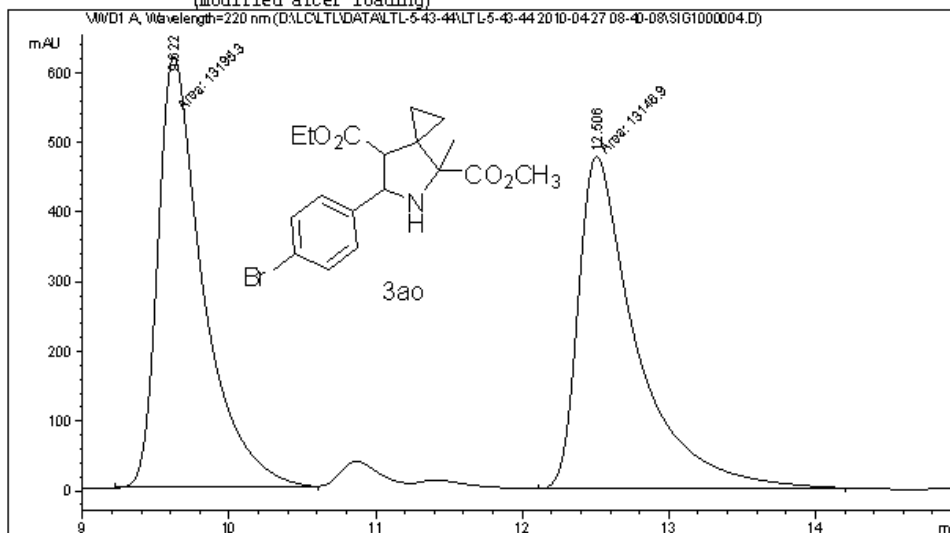

Area Percent Report

```

=====
Sorted By      :      Signal
Multiplier     :      1.0000
Dilution       :      1.0000
Use Multiplier & Dilution Factor with ISTDs
    
```

Signal 1: WVD1 A, Wavelength=220 nm

| Peak # | RetTime [min] | Type | Width [min] | Area mAU *s | Height [mAU] | Area %  |
|--------|---------------|------|-------------|-------------|--------------|---------|
| 1      | 9.622         | MM   | 0.3556      | 1.31952e4   | 618.37079    | 50.0918 |
| 2      | 12.506        | MM   | 0.4594      | 1.31469e4   | 476.90692    | 49.9082 |

Totals : 2.63421e4 1095.27771

Instrument 1 5/4/2010 8:45:14 PM TMC

Page 1 of 1

Data File D:\LC\LTL\DATA\LTL-5-43-44\LTL-5-43-44 2010-04-27 08-40-08\SIG1000003.D  
 Sample Name: LTL-5-43B

```

=====
Acq. Operator   : LTL                               Seq. Line :    3
Acq. Instrument : Instrument 1                       Location  : Vial 96
Injection Date  : 4/27/2010 9:14:16 AM             Inj       :    1
                                                    Inj Volume: 5 µl
Acq. Method    : D:\LC\LTL\data\LTL-5-43-44\LTL-5-43-44 2010-04-27 08-40-08\ADH-5-95-10ML-
                220NM-20MIN.M
Last changed   : 4/27/2010 8:37:49 AM by LTL
Analysis Method : D:\LC\LTL\DATA\LTL-5-43-44\LTL-5-43-44 2010-04-27 08-40-08\SIG1000003.D\
                DA.M (ADH-5-95-10ML-220NM-20MIN.M)
Last changed   : 5/4/2010 8:46:35 PM by TMC
                (modified after loading)
    
```

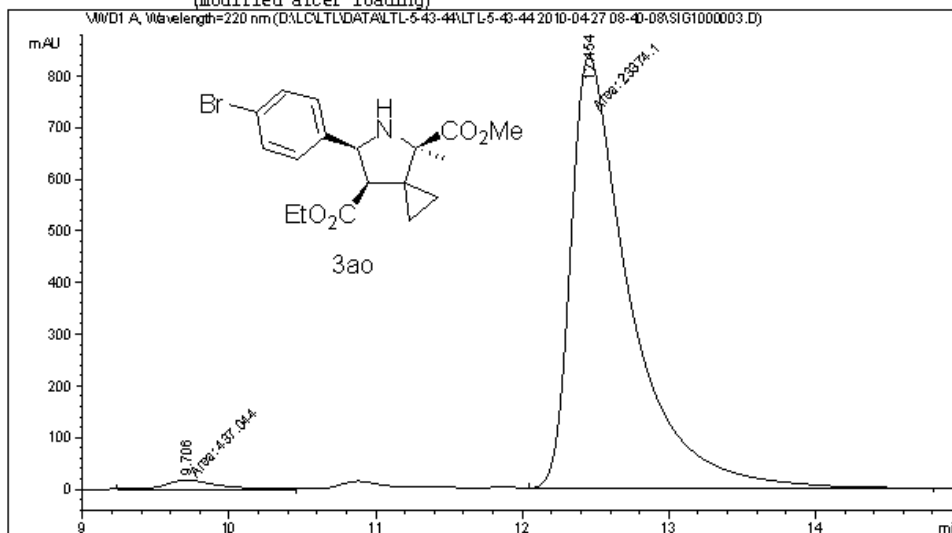

Area Percent Report

```

=====
Sorted By      :      Signal
Multiplier     :      1.0000
Dilution       :      1.0000
Use Multiplier & Dilution Factor with ISTDs
    
```

Signal 1: WVD1 A, Wavelength=220 nm

| Peak # | RetTime [min] | Type | Width [min] | Area mAU  | Height [mAU] | Area %  |
|--------|---------------|------|-------------|-----------|--------------|---------|
| 1      | 9.706         | MM   | 0.4029      | 437.04388 | 18.08111     | 1.8355  |
| 2      | 12.454        | MM   | 0.4661      | 2.33741e4 | 835.77728    | 98.1645 |

Totals :                    2.38111e4    853.85840



Data File D:\LC\LTL\DATA\LTL-5-47\LTL-5-47B 2010-04-28 17-10-24\SIG1000001.D  
 Sample Name: LTL-5-47B

```

=====
Acq. Operator   : LTL                               Seq. Line :    1
Acq. Instrument : Instrument 1                       Location  : Vial 8
Injection Date  : 4/28/2010 5:12:02 PM              Inj       :    1
                                                    Inj Volume: 5 µl
Acq. Method     : D:\LC\LTL\data\LTL-5-47\LTL-5-47B 2010-04-28 17-10-24\ADH-5-95-10ML-210MM-20MIN.M
Last changed    : 4/26/2010 9:35:52 PM by DXQ
Analysis Method : D:\LC\LTL\DATA\LTL-5-47\LTL-5-47B 2010-04-28 17-10-24\SIG1000001.D\DA.M (
                ADH-5-95-10ML-210MM-20MIN.M)
Last changed    : 4/28/2010 6:13:55 PM by LTL
                (modified after loading)
    
```

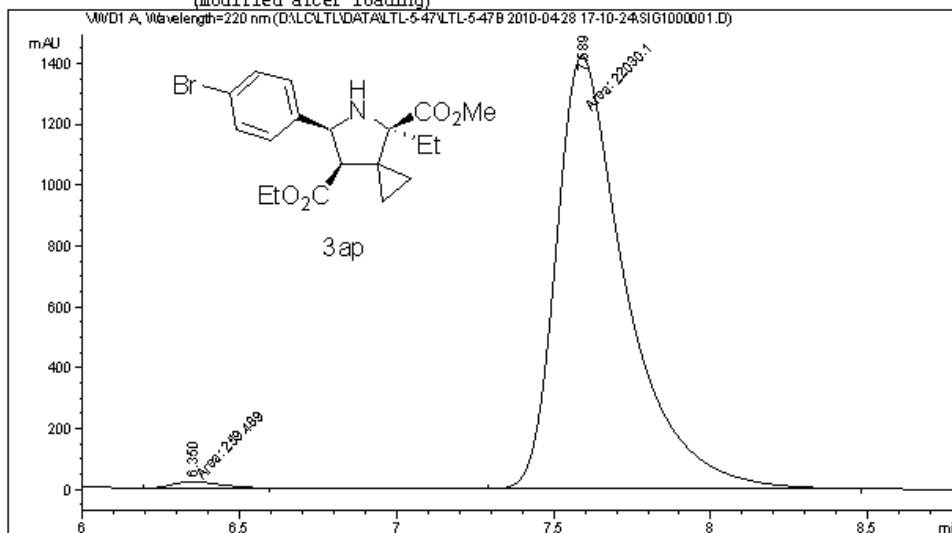

=====  
 Area Percent Report  
 =====

```

Sorted By      :      Signal
Multiplier     :      1.0000
Dilution       :      1.0000
Use Multiplier & Dilution Factor with ISTDs
    
```

Signal 1: WVD1 A, Wavelength=220 nm

| Peak # | RetTime [min] | Type | Width [min] | Area mAU  | Height [mAU] | Area %  |
|--------|---------------|------|-------------|-----------|--------------|---------|
| 1      | 6.350         | MM   | 0.1928      | 259.48907 | 22.43086     | 1.1642  |
| 2      | 7.589         | MM   | 0.2579      | 2.20301e4 | 1423.69861   | 98.8358 |

Totals :                                      2.22896e4    1446.12947

Data File D:\LC\LTL\DATA\LTL-5-49\LTL-5-49A-1 2010-04-28 16-17-11\SIG1000001.D  
 Sample Name: LTL-5-49A

```

=====
Acq. Operator   : LTL                               Seq. Line :    1
Acq. Instrument : Instrument 1                       Location  : Vial 6
Injection Date  : 4/28/2010 4:18:50 PM              Inj       :    1
                                                    Inj Volume: 5 µl
Acq. Method     : D:\LC\LTL\data\LTL-5-49\LTL-5-49A-1 2010-04-28 16-17-11\ADH-5-95-10ML-
220NM-20MIN.M
Last changed    : 4/27/2010 8:37:49 AM by LTL
Analysis Method : D:\LC\LTL\DATA\LTL-5-49\LTL-5-49A-1 2010-04-28 16-17-11\SIG1000001.D\DA.M
(ADH-5-95-10ML-220NM-20MIN.M)
Last changed    : 4/28/2010 8:33:25 PM by LTL
(modified after loading)
    
```

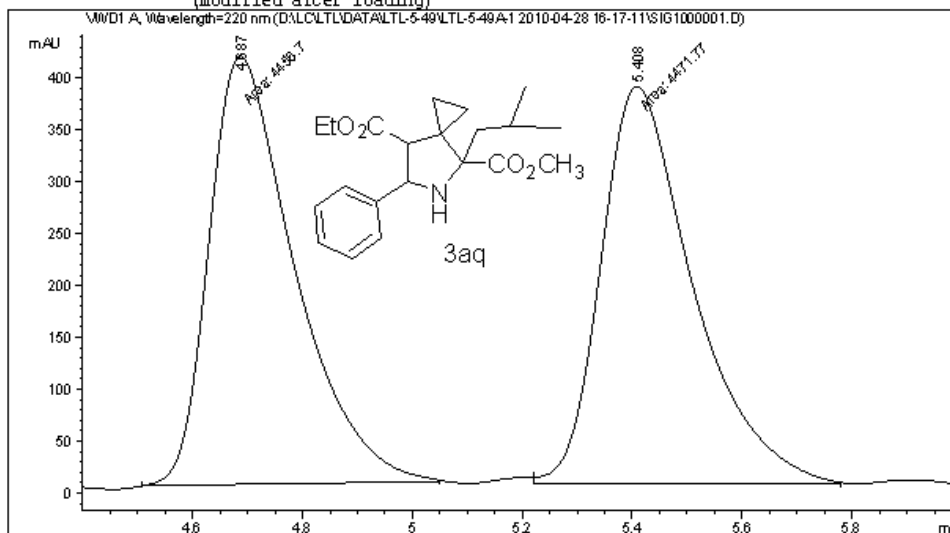

Area Percent Report

```

Sorted By      :      Signal
Multiplier     :      1.0000
Dilution       :      1.0000
Use Multiplier & Dilution Factor with ISTDs
    
```

Signal 1: WVD1 A, Wavelength=220 nm

| Peak # | RetTime [min] | Type | Width [min] | Area mAU   | Height [mAU] | Area %  |
|--------|---------------|------|-------------|------------|--------------|---------|
| 1      | 4.687         | MM   | 0.1797      | 4456.70459 | 413.35596    | 49.9156 |
| 2      | 5.408         | MM   | 0.1941      | 4471.77148 | 383.97849    | 50.0844 |

Totals : 8928.47607 797.33444

Data File D:\LC\LTL\DATA\LTL-5-49\LTL-5-49B 2010-05-04 15-00-56\SIG1000002.D  
 Sample Name: LTL-5-49B

```

=====
Acq. Operator   : LTL                      Seq. Line :    2
Acq. Instrument : Instrument 1              Location  : Vial 12
Injection Date  : 5/4/2010 3:13:34 PM      Inj       :    1
                                           Inj Volume: 5 µl
Acq. Method     : D:\LC\LTL\data\LTL-5-49\LTL-5-49B 2010-05-04 15-00-56\ADH-5-95-10ML-220NM-
20MIN.M
Last changed    : 4/27/2010 8:37:49 AM by LTL
Analysis Method : D:\LC\LTL\DATA\LTL-5-49\LTL-5-49B 2010-05-04 15-00-56\SIG1000002.D\DA.M (
ADH-5-95-10ML-220NM-20MIN.M)
Last changed    : 5/4/2010 3:52:19 PM by TMC
(modified after loading)
    
```

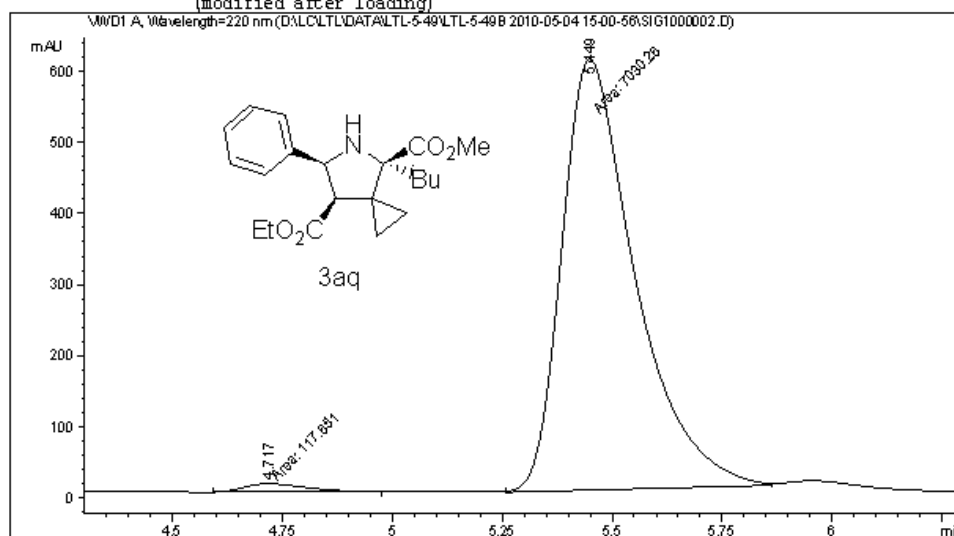

Area Percent Report

```

=====
Sorted By      :      Signal
Multiplier     :      1.0000
Dilution       :      1.0000
Use Multiplier & Dilution Factor with ISTDs
    
```

Signal 1: WVD1 A, Wavelength=220 nm

| Peak # | RetTime [min] | Type | Width [min] | Area mAU   | Height [mAU] | Area %  |
|--------|---------------|------|-------------|------------|--------------|---------|
| 1      | 4.717         | MM   | 0.1646      | 117.65134  | 11.91053     | 1.6460  |
| 2      | 5.449         | MM   | 0.1930      | 7030.26367 | 607.06598    | 98.3540 |

Totals :                    7147.91502   618.97650
